# Supplementary material for: One-electron reduction induced spin transition in Fe(ii) spin crossover molecules and the effect of the ligand
Source: Royal Society of Chemistry journal article supplement (doi:10.1039/d1tc00041a), 2021-01-01
Supplement: d1tc00041a1.pdf [file d1tc00041a1.pdf]

## Supplementary Information

### One-Electron Reduction Induced Spin Transition in Fe(II) Spin Crossover Molecules and Effect of Ligand

Hua Hao<sup>\*a,b</sup>, Ting Jia<sup>a</sup>, Xiaohong Zheng<sup>a</sup>, Peng Liu<sup>b</sup>, and Zhi Zeng<sup>a</sup>

a) Key Laboratory of Materials Physics, Institute of Solid State Physics, HFIPS, Chinese Academy of Sciences, Hefei 230031, China. E-mail: [lhao@theory.issp.ac.cn](mailto:lhao@theory.issp.ac.cn)

b) Department of Chemistry, University of Pittsburgh, 219 Parkman Avenue, Pittsburgh, Pennsylvania 15260, United States.

#### Table of Contents

- S1. Details of structural and electronic properties of considered molecules
- S2. Details of energy composition analysis (EDA) calculations
- S3. Cartesian coordinates of important molecules and fragments

## S1. Details of structural and electronic properties of considered molecules

### ➤ Electronic configurations considered for each molecule

For each molecule, three spin configurations were considered in the neutral state ( $LS^0$ ,  $HS^0$ , and  $MS^0$ ). The  $LS^0$  configuration is related to a low-spin FeII ion with  $S_{Fe}=0$  and  $S=0$ . The  $HS^0$  configuration is related to a high-spin FeII ion with  $S_{Fe}=2$  and  $S=2$ . The  $MS^0$  configuration of the whole molecule is related to a middle-spin FeII ion with  $S_{Fe}=1$  and  $S=1$ .  $S_{Fe}$  and  $S$  denote the spin quantum number of the FeII ion and the whole molecule. In the reduced state, only one  $LS^-$  configuration is formed and related to  $S_{Fe}=0$  and  $S=1/2$ . Two  $HS^-$  configurations can be formed: one related to  $S_{Fe}=2$  and  $S=5/2$ ; the other related to  $S_{Fe}=2$  and  $S=3/2$ . Similarly, there are two possible  $MS^-$  configurations, that is,  $S_{Fe}=1$  along with  $S=3/2$  and  $S_{Fe}=1$  along with  $S=1/2$ . In summary, eight electronic configurations are considered here. It is pointed out that only  $LS^0$  ( $S_{Fe}=0, S=0$ ),  $HS^0$  ( $S_{Fe}=2, S=2$ ),  $LS^-$  ( $S_{Fe}=0, S=1/2$ ), and  $HS^-$  ( $S_{Fe}=2, S=3/2$ ) were demonstrated and discussed in the main paper since they were directly associated with the spin transition under the reduction, indicated by Table S1. Figures and tables, except Table S1, in the Supplementary Information are only related to  $LS^0$  ( $S_{Fe}=0, S=0$ ),  $HS^0$  ( $S_{Fe}=2, S=2$ ),  $LS^-$  ( $S_{Fe}=0, S=1/2$ ), and  $HS^-$  ( $S_{Fe}=2, S=3/2$ ).

Table S1. Zero-point corrected total energies ( $E$ ) of  $HS^0$  and  $MS^0$  relative to  $LS^0$  ( $S=0, S_{Fe}=0$ ) for the neutral molecules and those of  $HS^-$  and  $MS^-$  relative to  $LS^-$  ( $S=1/2, S_{Fe}=0$ ) for the reduced molecules. The energy unit is kcal/mol.

| $N_c$ | Neutral ( $Q = 0$ )                 |                                     | Reduced ( $Q = -1$ )                  |                                       |                                       |                                       |
|-------|-------------------------------------|-------------------------------------|---------------------------------------|---------------------------------------|---------------------------------------|---------------------------------------|
|       | $\delta E^0(HS)$<br>$S_{Fe}=2, S=2$ | $\delta E^0(MS)$<br>$S_{Fe}=1, S=1$ | $\delta E^-(HS)$<br>$S_{Fe}=2, S=3/2$ | $\delta E^-(HS)$<br>$S_{Fe}=2, S=5/2$ | $\delta E^-(MS)$<br>$S_{Fe}=1, S=1/2$ | $\delta E^-(MS)$<br>$S_{Fe}=1, S=3/2$ |
| 2     | 4.5                                 | 10.8                                | 0.1                                   | 2.8                                   | 12.0                                  | 11.4                                  |
| 3     | 4.0                                 | 10.2                                | -0.6                                  | 2.4                                   | 12.3                                  | 10.6                                  |
| 4     | 4.6                                 | 10.7                                | -0.1                                  | 3.0                                   | 11.7                                  | 19.9                                  |
| 5     | 4.6                                 | 10.7                                | 2.3                                   | 3.6                                   | 11.3                                  | 19.7                                  |
| 6     | 4.3                                 | 10.7                                | 3.4                                   | 3.4                                   | 10.7                                  | 10.7                                  |
| 7     | 4.3                                 | 10.7                                | 3.3                                   | 4.0                                   | 10.6                                  | 10.6                                  |

Table S2. Comparison of selected bond lengths (unit=Å) and bond angles (unit=deg) for  $Fe[H_2B(Pz)_2]_2(bpy)$  with  $N_c = 2$  and  $Fe[H_2B(Pz)_2]_2(phen)$  with  $N_c = 3$ . 'Exp' and 'Cal' mean experimental values reported in Ref. 25 and calculated values based on our DFT calculations.

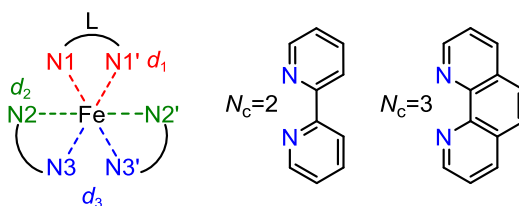

| Bond lengths & Bond angles | $LS^0$ ( $N_c=2$ ) |       | $HS^0$ ( $N_c=2$ ) |       | $HS^0$ ( $N_c=3$ ) |       |
|----------------------------|--------------------|-------|--------------------|-------|--------------------|-------|
|                            | Exp                | Cal   | Exp                | Cal   | Exp                | Cal   |
| $d(Fe-N1)$                 | 2.013              | 1.987 | 2.213              | 2.254 | 2.212              | 2.268 |
| $d(Fe-N2)$                 | 2.046              | 2.029 | 2.190              | 2.192 | 2.184              | 2.186 |
| $d(Fe-N3)$                 | 2.039              | 2.012 | 2.157              | 2.152 | 2.158              | 2.150 |
| $\angle(N1-Fe-N2)$         | 92.3               | 92.0  | 93.9               | 94.4  | 89.8               | 93.6  |
| $\angle(N1-Fe-N3)$         | 97.0               | 95.8  | 97.2               | 96.1  | 97.2               | 95.3  |
| $\angle(N2-Fe-N3)$         | 90.1               | 91.0  | 88.7               | 88.7  | 90.9               | 88.9  |
| $\angle(N1-Fe-N1')$        | 78.9               | 81.5  | 73.2               | 72.4  | 75.0               | 73.5  |
| $\angle(N3-Fe-N3')$        | 87.1               | 86.9  | 92.6               | 95.8  | 90.7               | 96.3  |

Table S3. Enthalpy and Gibbs free energy differences between LS and HS at 150 K. Definitions for  $\delta E_{\text{H}}^0$ ,  $\delta E_{\text{G}}^0$ ,  $\Delta(\delta E_{\text{H}})$ , and  $\Delta(\delta E_{\text{G}})$  are similar to  $\delta E^0$  and  $\Delta(\delta E)$  displayed in Fig. 3 in the main paper. It shows that the LS configuration is the ground state for  $N_{\text{c}}=2$  and 3 at 150 K, consistent with Ref. 25 in the main paper.

| $N_{\text{c}}$ | Neutral                 |                         | Reduced                 |                         | Reduced–Neutral               |                               |
|----------------|-------------------------|-------------------------|-------------------------|-------------------------|-------------------------------|-------------------------------|
|                | $\delta E_{\text{H}}^0$ | $\delta E_{\text{G}}^0$ | $\delta E_{\text{H}}^-$ | $\delta E_{\text{G}}^-$ | $\Delta(\delta E_{\text{H}})$ | $\Delta(\delta E_{\text{G}})$ |
| <b>2</b>       | 5.3                     | 2.8                     | 0.9                     | -1.2                    | -4.4                          | -4.0                          |
| <b>3</b>       | 4.7                     | 2.2                     | 0.2                     | -2.0                    | -4.5                          | -4.2                          |
| <b>4</b>       | 5.4                     | 2.9                     | 0.6                     | -1.6                    | -4.8                          | -4.5                          |
| <b>5</b>       | 5.4                     | 2.9                     | 3.1                     | 0.9                     | -2.3                          | -2.0                          |
| <b>6</b>       | 5.1                     | 2.7                     | 4.2                     | 2.0                     | -0.9                          | -0.7                          |
| <b>7</b>       | 5.1                     | 2.6                     | 4.0                     | 1.8                     | -1.1                          | -0.8                          |

Table S4. Source data for Fig. 3 in the main paper

| $N_{\text{c}}$ | Neutral ( $Q = 0$ )     |                         |              | Reduced ( $Q = -1$ )    |                         |              | Reduced–Neutral               |                    |
|----------------|-------------------------|-------------------------|--------------|-------------------------|-------------------------|--------------|-------------------------------|--------------------|
|                | $\delta E_{\text{e}}^0$ | $\delta(\text{ZPVE})^0$ | $\delta E^0$ | $\delta E_{\text{e}}^-$ | $\delta(\text{ZPVE})^-$ | $\delta E^-$ | $\Delta(\delta E_{\text{e}})$ | $\Delta(\delta E)$ |
| 2              | 7.1                     | -2.6                    | 4.5          | 2.6                     | -2.5                    | 0.1          | -4.5                          | -4.4               |
| 3              | 6.5                     | -2.5                    | 4.0          | 1.7                     | -2.3                    | -0.6         | -4.8                          | -4.6               |
| 4              | 7.1                     | -2.5                    | 4.6          | 2.2                     | -2.3                    | -0.1         | -4.9                          | -4.7               |
| 5              | 7.1                     | -2.5                    | 4.6          | 4.7                     | -2.4                    | 2.3          | -2.4                          | -2.3               |
| 6              | 6.8                     | -2.5                    | 4.3          | 6.0                     | -2.6                    | 3.4          | -0.8                          | -0.9               |
| <b>7</b>       | 6.8                     | -2.5                    | 4.3          | 5.8                     | -2.5                    | 3.3          | -1.0                          | -1.0               |

➤ Temperature effect on the spin transition induced by the reduction

The temperature effect is not important for the spin transition induced by the one-electron reduction, thus not discussed in the main paper. The reason is as follows.

For molecular devices of SCO molecules, it is important to switch LS and HS by voltages. For this purpose, it is necessary to retain the LS configuration when voltages are not applied. Thus related STM or similar experiments were usually conducted at low temperatures (about 5 Kelvin, Refs. 16, 18, and 19) since most SCO molecules have low transition temperatures ( $T_{\text{c}}$ ). Once the temperature is above  $T_{\text{c}}$  in experiments, the HS configuration is favored in Gibbs free energy and the spin switch is out of control by voltages. In these experiments, the temperature effect is little and ignorable.

In other experiments (Refs. 17 and 20) SCO molecules with high  $T_{\text{c}}$  were involved. Although the temperature is lower than  $T_{\text{c}}$  for retaining the LS configuration, the temperature effect seems not to be neglected. We take 150 K as an example to demonstrate the temperature effect on the spin transition of our considered SCO molecules. The calculation shows that at 150 K the LS configuration is retained in Gibbs free energy ( $\delta E_{\text{G}}^0 \approx 2.5$  kcal/mol) in the neutral state, and the key quantity for the spin transition induced by electron reduction is  $\Delta(\delta E_{\text{G}})$ . However, Table S3 reveals that  $\Delta(\delta E_{\text{G}})$  is determined by electronic effects, i.e.,  $\Delta(\delta E_{\text{e}})$  in Table S2. Therefore, the spin transition induced by the reduction is little affected by the temperature.

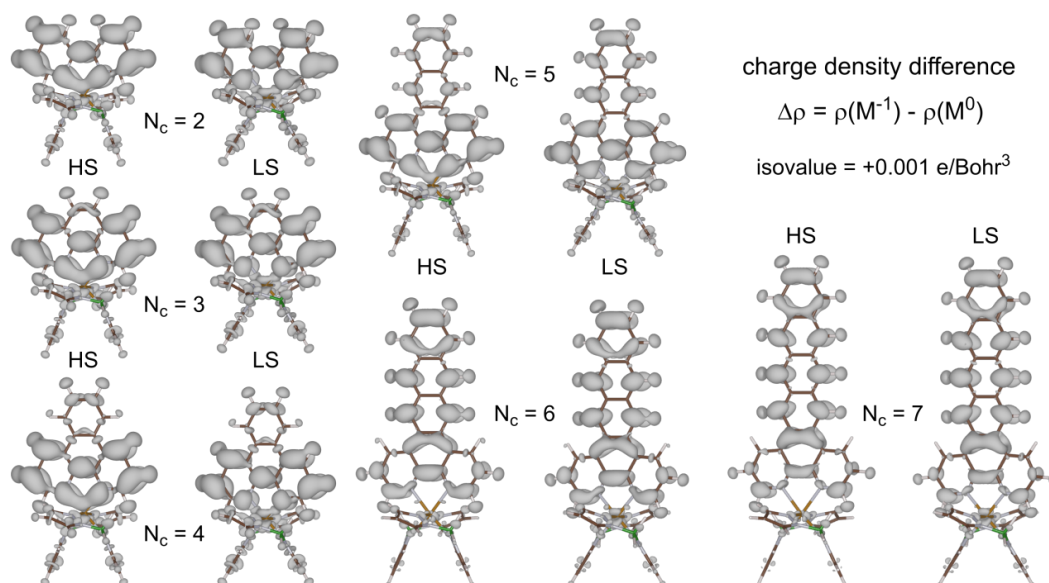

Fig. S1. Charge density difference ( $\Delta\rho$ ) between neutral and reduced molecules.  $\Delta\rho$  surfaces are drawn with the isovalue of  $+0.001 \text{ e/Bohr}^3$ , which indicate the distributions of the electron increase. Surfaces related to the isovalue of  $-0.001 \text{ e/Bohr}^3$  is trivial and not shown for clarity. The shown  $\Delta\rho$  surfaces are calculated using the optimized structures of reduced molecules. These electron-increase distributions are well consistent with HOMOs of reduced molecules shown in Fig. 4 and Fig. S2.  $\Delta\rho$  is also calculated using the optimized structures of neutral molecules, and the corresponding results are quite close to these displayed here.

Table S5. Mulliken charges of two fragments of considered molecules and spin density ( $\alpha-\beta$ ) of Fe in the HS configuration. They were calculated at the B3LYP\*/Def2-TZVP level. The L ligand and  $\text{Fe}[\text{H}_2\text{B}(\text{Pz})_2]_2$  are respectively denoted by Frag1 and Frag2. The spin density equals to majority-spin (or  $\alpha$ ) electrons minus beta-spin (or  $\beta$ ) ones.

| Nc | Neutral |       |                              | Reduced |       |                              | Reduced-Neutral      |                      |
|----|---------|-------|------------------------------|---------|-------|------------------------------|----------------------|----------------------|
|    | Frag1   | Frag2 | $(\alpha-\beta)_{\text{Fe}}$ | Frag1   | Frag2 | $(\alpha-\beta)_{\text{Fe}}$ | $\Delta\text{Frag1}$ | $\Delta\text{Frag2}$ |
| 2  | 0.27    | -0.27 | 3.76                         | -0.40   | -0.60 | 3.70                         | <b>-0.67</b>         | <b>-0.33</b>         |
| 3  | 0.25    | -0.25 | 3.76                         | -0.40   | -0.60 | 3.70                         | <b>-0.65</b>         | <b>-0.35</b>         |
| 4  | 0.26    | -0.26 | 3.76                         | -0.41   | -0.59 | 3.70                         | <b>-0.67</b>         | <b>-0.33</b>         |
| 5  | 0.26    | -0.26 | 3.82                         | -0.47   | -0.53 | 3.72                         | <b>-0.73</b>         | <b>-0.27</b>         |
| 6  | 0.26    | -0.26 | 3.76                         | -0.59   | -0.41 | 3.76                         | <b>-0.85</b>         | <b>-0.15</b>         |
| 7  | 0.27    | -0.27 | 3.76                         | -0.61   | -0.39 | 3.76                         | <b>-0.88</b>         | <b>-0.12</b>         |

Table S6. Mulliken charges of two fragments of considered complexes and spin density of Fe in the LS configuration. Other details are the same as those in Table S4.

| Nc | Neutral |       |                              | Reduced |       |                              | Reduced-Neutral      |                      |
|----|---------|-------|------------------------------|---------|-------|------------------------------|----------------------|----------------------|
|    | Frag1   | Frag2 | $(\alpha-\beta)_{\text{Fe}}$ | Frag1   | Frag2 | $(\alpha-\beta)_{\text{Fe}}$ | $\Delta\text{Frag1}$ | $\Delta\text{Frag2}$ |
| 2  | 0.56    | -0.56 | 0.00                         | -0.21   | -0.79 | 0.02                         | <b>-0.77</b>         | <b>-0.23</b>         |
| 3  | 0.56    | -0.56 | 0.00                         | -0.21   | -0.79 | 0.03                         | <b>-0.77</b>         | <b>-0.23</b>         |
| 4  | 0.57    | -0.57 | 0.00                         | -0.21   | -0.79 | 0.03                         | <b>-0.78</b>         | <b>-0.22</b>         |
| 5  | 0.57    | -0.57 | 0.00                         | -0.25   | -0.75 | 0.01                         | <b>-0.82</b>         | <b>-0.18</b>         |
| 6  | 0.57    | -0.57 | 0.00                         | -0.30   | -0.70 | 0.00                         | <b>-0.87</b>         | <b>-0.13</b>         |
| 7  | 0.57    | -0.57 | 0.00                         | -0.31   | -0.69 | 0.00                         | <b>-0.88</b>         | <b>-0.12</b>         |

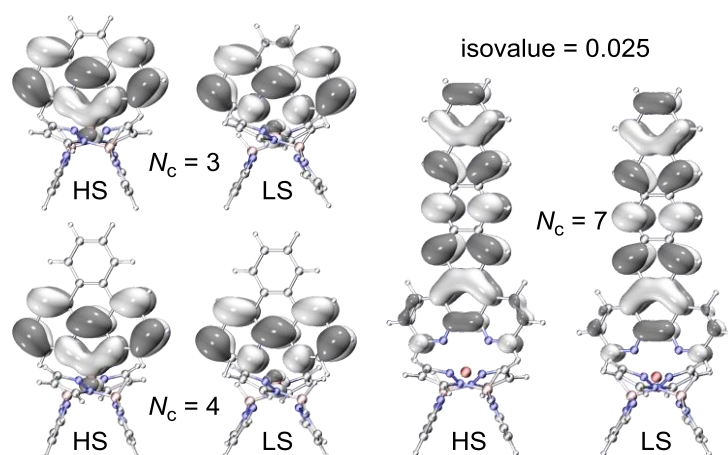

Fig. S2. Isosurfaces of HOMO for reduced HS and LS configurations.

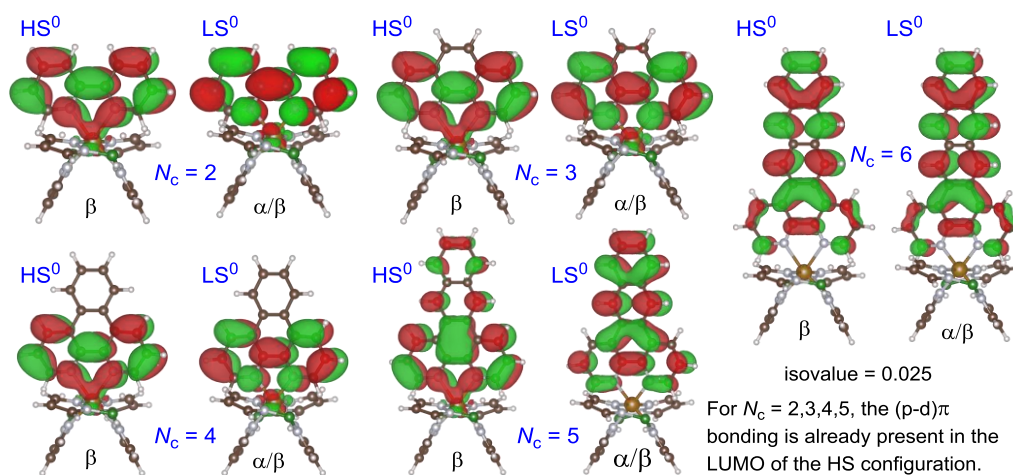

Fig. S3. Lowest unoccupied molecular orbitals (LUMOs) in the HS<sup>0</sup> and LS<sup>0</sup> configurations. These LUMOs were calculated using the optimized structures of neutral molecules.  $\beta$  denotes the beta-spin molecular orbitals.  $\alpha/\beta$  means the spin-degenerate molecular orbitals.

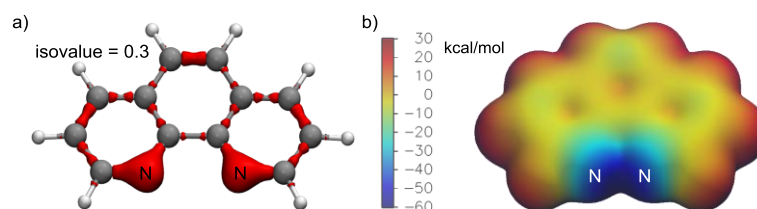

Fig. S4. a) Electron density of the gas-phase (or equilibrium) L ligand ( $N_c=2$ ) in the neutral state. It shows high electron density around nitrogen atoms. b) Electrostatic potential (ESP) mapped to the electron density isosurface (isovalue =  $0.002 \text{ e/au}^3$ ). It consistently shows high electric potential around nitrogen atoms.

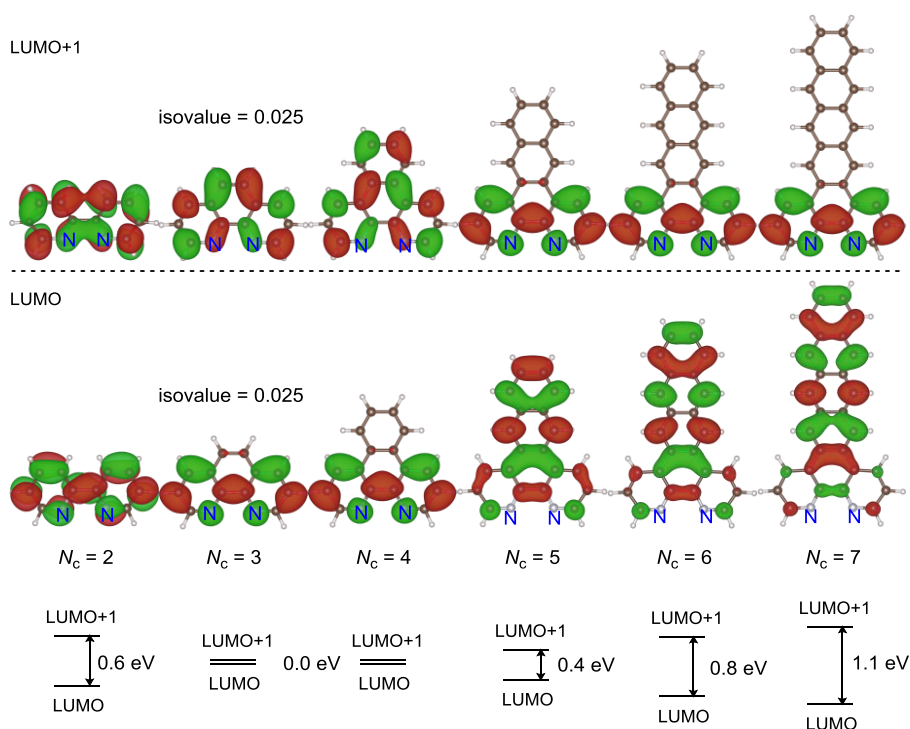

Fig. S5. LUMO and LUMO+1 of the neutral gas-phase L ligand. Energy gaps between LUMO and LUMO+1 are marked as well. These were calculated at the B3LYP\*/Def2-TZVP level.

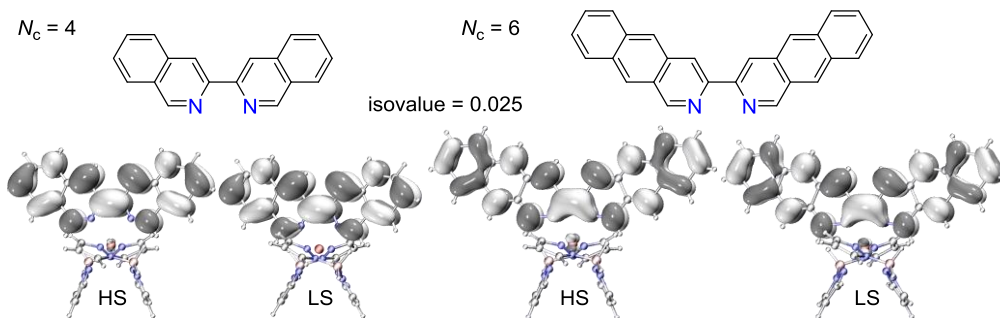

Fig. S6. Two other considered molecules for  $N_c = 4, 6$  and HOMOs of  $HS^-$  and  $LS^-$  configurations for these two molecules. Ignorable (p-d) $\pi$  bonding is witnessed in their HOMOs of the  $HS^-$  configuration.

Table S7. Energy differences between LS and HS ( $\delta E_e$  and  $\delta E$ ) and variation of  $\delta E_e$  ( $\delta E$ ) induced by the added electron for  $N_c = 2$  and for  $N_c = 4, 6$  shown in Fig. S6.

| Nc | Neutral ( $Q = 0$ ) |                  |              | Reduced ( $Q = -1$ ) |                  |              | Reduced-Neutral      |                    |
|----|---------------------|------------------|--------------|----------------------|------------------|--------------|----------------------|--------------------|
|    | $\delta E_e^0$      | $\delta(ZPVE)^0$ | $\delta E^0$ | $\delta E_e^-$       | $\delta(ZPVE)^-$ | $\delta E^-$ | $\Delta(\delta E_e)$ | $\Delta(\delta E)$ |
| 2  | 7.1                 | -2.6             | 4.5          | 2.6                  | -2.5             | 0.1          | -4.5                 | -4.4               |
| 4  | 6.6                 | -2.5             | 4.1          | 5.6                  | -2.8             | 2.8          | -1.0                 | -1.3               |
| 6  | 6.9                 | -2.5             | 4.4          | 4.9                  | -2.5             | 2.4          | -2.0                 | -2.0               |

Table S8. Variations of Fe-N bond lengths induced by the added electron in different spin configurations. The Fe-N bond lengths are decreased due to the (p-d) $\pi$  bonding in the HS<sup>-</sup> configuration. As  $N_c$  increasing, the magnitude of  $\Delta(d_1)$  grows smaller, consistent with the weakening of the (p-d) $\pi$  bonding. Magnitudes of  $\Delta(d_{1,2,3})$  in the HS state are larger than those in the LS state, consistent with larger deformation energies in the HS<sup>-</sup> configuration (see Table S10 below).

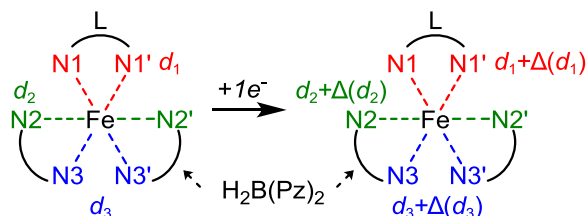

| $N_c$ | HS <sup>-</sup> – HS <sup>0</sup> |               |               | LS <sup>-</sup> – LS <sup>0</sup> |               |               |
|-------|-----------------------------------|---------------|---------------|-----------------------------------|---------------|---------------|
|       | $\Delta(d_1)$                     | $\Delta(d_2)$ | $\Delta(d_3)$ | $\Delta(d_1)$                     | $\Delta(d_2)$ | $\Delta(d_3)$ |
| 2     | -0.099                            | 0.031         | 0.081         | 0.006                             | 0.002         | 0.019         |
| 3     | -0.105                            | 0.033         | 0.079         | 0.005                             | 0.003         | 0.019         |
| 4     | -0.099                            | 0.030         | 0.075         | 0.004                             | 0.002         | 0.019         |
| 5     | -0.075                            | 0.023         | 0.062         | 0.005                             | 0.000         | 0.016         |
| 6     | -0.038                            | 0.011         | 0.036         | 0.007                             | 0.000         | 0.012         |
| 7     | -0.032                            | 0.008         | 0.031         | 0.006                             | 0.000         | 0.011         |

Table S9. Variations of Fe-N bond angles ( $\alpha_1$ – $\alpha_6$ ) induced by the added electron in different spin configurations. Magnitudes of  $\Delta(\alpha_1)$ – $\Delta(\alpha_6)$  in the HS<sup>-</sup> configuration are similarly larger than those in the LS configuration. Variations of  $\Delta(\alpha_1)$ – $\Delta(\alpha_6)$  in the HS<sup>-</sup> configuration are correlated with the (p-d) $\pi$  bonding in HOMOs of the HS<sup>-</sup> configuration.

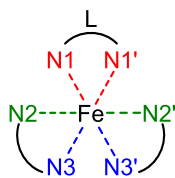

$\alpha_1 = \angle(\text{N1-Fe-N2})$   
 $\alpha_2 = \angle(\text{N1-Fe-N3})$   
 $\alpha_3 = \angle(\text{N2-Fe-N3})$   
 $\alpha_4 = \angle(\text{N1-Fe-N1'})$   
 $\alpha_5 = \angle(\text{N3-Fe-N3'})$   
 $\alpha_6 = \angle(\text{N2-Fe-N2'})$

| HS <sup>-</sup> – HS <sup>0</sup> | $N_c=2$ | $N_c=3$ | $N_c=4$ | $N_c=5$ | $N_c=6$ | $N_c=7$ |
|-----------------------------------|---------|---------|---------|---------|---------|---------|
| $\Delta(\alpha_1)$                | 2.1     | 2.7     | 2.3     | 1.5     | 0.5     | 0.4     |
| $\Delta(\alpha_2)$                | 2.6     | 2.6     | 2.6     | 2.3     | 2.2     | 1.9     |
| $\Delta(\alpha_3)$                | -2.0    | -2.2    | -2.1    | -1.5    | -0.5    | -0.3    |
| $\Delta(\alpha_4)$                | 3.6     | 3.6     | 3.4     | 3.1     | 1.9     | 1.5     |
| $\Delta(\alpha_5)$                | -9.4    | -9.4    | -8.9    | -8.0    | -6.2    | -5.5    |
| $\Delta(\alpha_6)$                | -7.5    | -8.1    | -7.5    | -5.9    | -3.2    | -2.6    |
| LS <sup>-</sup> – LS <sup>0</sup> | $N_c=2$ | $N_c=3$ | $N_c=4$ | $N_c=5$ | $N_c=6$ | $N_c=7$ |
| $\Delta(\alpha_1)$                | -0.9    | -0.8    | -0.7    | -1.1    | -1.1    | -0.9    |
| $\Delta(\alpha_2)$                | 0.3     | 0.5     | 0.3     | 0.3     | 0.4     | 0.4     |
| $\Delta(\alpha_3)$                | 0.4     | 0.4     | 0.3     | 0.4     | 0.5     | 0.4     |
| $\Delta(\alpha_4)$                | 0.8     | 0.5     | 0.6     | 0.7     | 0.3     | 0.2     |
| $\Delta(\alpha_5)$                | -1.4    | -1.5    | -1.4    | -1.3    | -1.2    | -1.0    |
| $\Delta(\alpha_6)$                | 0.7     | 0.4     | 0.4     | 0.3     | 0.3     | 0.3     |

## S2. Details of energy composition analysis (EDA) calculations

### 1) Definitions of fragments for the EDA calculation and necessary explanations

a) For simplicity, the neutral HS configuration is marked by HS<sup>0</sup> with  $S=2$ ,  $S_{\text{Fe}}=2$ . When performing the EDA calculation for this configuration, Frag1 directly used the L-ligand part in the HS<sup>0</sup> structure. This part is in the neutral state with  $S=0$ , and denoted by F1<sup>0</sup>(HS<sup>0</sup>) in the following. Frag2 directly used the Fe[H<sub>2</sub>B(Pz)<sub>2</sub>]<sub>2</sub> part in the HS<sup>0</sup> structure. This part is in the neutral state with  $S=2$ ,  $S_{\text{Fe}}=2$ , and denoted by F2<sup>0</sup>(HS<sup>0</sup>) in the following.

b) The neutral LS configuration is marked by  $LS^0$  with  $S = 0$ ,  $S_{Fe} = 0$ . When performing the EDA calculation for this configuration, Frag1 directly used the L-ligand part in the  $LS^0$  structure. This part is in the neutral state with  $S = 0$ , and denoted by  $F1^0(LS^0)$  in the following. Frag2 directly used the  $Fe[H_2B(Pz)_2]_2$  part in the  $LS^0$  structure. This part is in the neutral state with  $S = 0$ ,  $S_{Fe} = 0$ , and denoted by  $F2^0(LS^0)$  in the following.

c) The reduced HS configuration is marked by  $HS^-$  with  $S = 3/2$ ,  $S_{Fe} = 2$ . When performing the EDA calculation for this configuration, Frag1 used the L-ligand part in the  $HS^-$  structure. This part is in the reduced state (i.e.  $L^-$ ) with  $S = 1/2$ , and denoted by  $F1^-(HS^-)$  in the following. Frag2 used the  $Fe[H_2B(Pz)_2]_2$  part in the  $HS^-$  structure. This part is still in the neutral state with  $S = 2$ ,  $S_{Fe} = 2$ , and denoted by  $F2^0(HS^-)$  in the following.

d) The reduced LS configuration is marked by  $LS^-$  with  $S = 1/2$ ,  $S_{Fe} = 0$ . When performing the EDA calculation for this configuration, Frag1 used the L-ligand part in the  $LS^-$  structure. This part is in the reduced state (i.e.  $L^-$ ) with  $S = 1/2$  as well, and denoted by  $F1^-(LS^-)$  in the following. Frag2 used the  $Fe[H_2B(Pz)_2]_2$  part in the  $LS^-$  structure. This part is in the neutral state with  $S = 0$ ,  $S_{Fe} = 0$ , and denoted by  $F2^0(LS^-)$  in the following.

e) The gas-phase Frag1 and Frag2 are required for the calculation of the deformation energy. The neutral Frag1 in the gas phase is marked by  $F1^0(GP)$  with  $S = 0$ , and the reduced Frag1 in the gas phase is marked by  $F1^-(GP)$  with  $S = 1/2$  in the following. The neutral HS Frag2 in the gas phase is marked by  $F2^0(HS/GP)$  with  $S = 2$ ,  $S_{Fe} = 2$  and the LS Frag2 in the gas phase is by  $F2^0(LS/GP)$  with  $S = 0$ ,  $S_{Fe} = 0$  in the following.

f)  $E_e$  denotes single-point or total electronic energy with the Grimme-D3(BJ) dispersion correction.

## 2) Energy terms given by the EDA study for the binding energy between Frag1 and Frag2

The binding energy ( $E_b$ ) between Frag1 and Frag2 is dissected into seven energy terms in the EDA study, that is, the deformation energy ( $E_{\text{deform}}$ ), the spin-excitation energy ( $E_s$ ), the electrostatic interaction energy ( $E_{\text{elstat}}$ ), the Pauli repulsion energy ( $E_{\text{Pauli}}$ ), the dispersion interaction energy ( $E_{\text{disp}}$ ), the polarization energy ( $E_{\text{pol}}$ ) and the charge transfer energy ( $E_{\text{ct}}$ ).  $E_{\text{deform}}$  is the energy consumed to deform fragments from their free (or equilibrium) geometries to combination geometries (in the overall molecular system).  $E_s$  is the energy increase from the HS configuration of the free Frag2 to its LS configuration. The HS configuration is the ground state of the free Frag2, while the LS configuration is an excited state of the free Frag2.  $E_{\text{elstat}}$  denotes the Coulomb interaction energy between unperturbed charge distributions of deformed fragments.  $E_{\text{Pauli}}$  accounts for the destabilizing interactions between occupied orbitals of Frag1 and Frag2.  $E_{\text{disp}}$  arises from interactions of instantaneous multipoles in fragments due to electron fluctuations in time and in this work it is calculated by the Grimme's D3 scheme with Becke-Johnson damping.  $E_{\text{pol}}$  describes the energy lowering resulting from the intra-fragment density relaxation of each fragment in response to all other fragments in the overall system.  $E_{\text{ct}}$  reflects donor-acceptor inter-fragment orbital interactions and electron-pairing bonding that bring about energy lowering in the system. The preparation energy ( $E_{\text{prep}}$  mentioned in the main paper) is the sum of  $E_{\text{deform}}$  and  $E_s$ . The through-space interaction energy ( $E_{\text{space}}$  mentioned in the main paper) is the sum of  $E_{\text{elstat}}$ ,  $E_{\text{Pauli}}$  and  $E_{\text{disp}}$ . The orbital interaction energy ( $E_{\text{orb}}$  mentioned in the main paper) is the sum of  $E_{\text{pol}}$  and  $E_{\text{ct}}$ .

## 3) Calculation of deformation energy ( $E_{\text{deform}}$ )

For the neutral HS configuration,

$$E_{\text{deform}}(HS^0) = E_e[F1^0(HS^0)] - E_e[F1^0(GP)] + E_e[F2^0(HS^0)] - E_e[F2^0(HS/GP)] \quad -- (1)$$

For the neutral LS configuration,

$$E_{\text{deform}}(LS^0) = E_e[F1^0(LS^0)] - E_e[F1^0(GP)] + E_e[F2^0(LS^0)] - E_e[F2^0(LS/GP)] \quad -- (2)$$

For the reduced HS configuration,



$$E_{\text{deform}}(\text{HS}^-) = E_e[\text{F1}^-(\text{HS}^-)] - E_e[\text{F1}^-(\text{GP})] + E_e[\text{F2}^0(\text{HS}^-)] - E_e[\text{F2}^0(\text{HS/GP})] \quad -- (3)$$

For the reduced LS configuration,

$$E_{\text{deform}}(\text{LS}^-) = E_e[\text{F1}^-(\text{LS}^-)] - E_e[\text{F1}^-(\text{GP})] + E_e[\text{F2}^0(\text{LS}^-)] - E_e[\text{F2}^0(\text{LS/GP})] \quad -- (4)$$

#### 4) Calculation of spin-excitation energy ( $E_s$ )

Since the metal ion is contained only in Frag2 (i.e.  $\text{Fe}[\text{H}_2\text{B}(\text{Pz})_2]_2$ ), the spin-excitation energy is only determined by this fragment. Our calculation showed that the HS configuration with  $S = 2$  and  $S_{\text{Fe}} = 2$  is the ground state of the neutral Frag2 in the gas phase, while the LS configuration with  $S = 0$  and  $S_{\text{Fe}} = 0$  is an excited state of the neutral Frag2 in the gas phase. Thus,

$$E_s(\text{HS}^0) = E_s(\text{HS}^-) = E_e[\text{F2}^0(\text{HS/GP})] - E_e[\text{F2}^0(\text{HS/GP})] = 0 \quad --(5)$$

$$E_s(\text{LS}^0) = E_s(\text{LS}^-) = E_e[\text{F2}^0(\text{LS/GP})] - E_e[\text{F2}^0(\text{HS/GP})] > 0 \quad --(6)$$

In the present work, the key quantity is the variation of energy induced by the added electron, and meanwhile, Frag2 is both  $[\text{Fe}[\text{H}_2\text{B}(\text{Pz})_2]_2]^0$  in the neutral and reduced configuration. Thus,

$$\Delta E_s(\text{HS}) = E_s(\text{HS}^-) - E_s(\text{HS}^0) = 0,$$

$$\Delta E_s(\text{LS}) = E_s(\text{LS}^-) - E_s(\text{LS}^0) = 0, \text{ and}$$

$$\Delta(\delta E_s) = \Delta E_s(\text{HS}) - \Delta E_s(\text{LS}) = 0.$$

#### 5) Calculations of electrostatic interaction energy ( $E_{\text{elstat}}$ ), Pauli repulsion energy ( $E_{\text{Pauli}}$ ), dispersion interaction energy ( $E_{\text{disp}}$ ), polarization energy ( $E_{\text{pol}}$ ), and charge-transfer energy ( $E_{\text{ct}}$ )

One can refer to references<sup>1,2</sup> for details about calculations of  $E_{\text{elstat}}$ ,  $E_{\text{Pauli}}$ ,  $E_{\text{pol}}$ , and  $E_{\text{ct}}$ . The dispersion interaction energy  $E_{\text{disp}}$  was calculated by the DFT-D3 package developed by the Grimme group.<sup>3</sup> Since the coefficient for B3LYP\* (15%HF) is not available,  $E_{\text{disp}}$  was calculated using the coefficient for B3LYP (20% HF). Besides, it is pointed out that these EDA energy terms were calculated based on  $\text{F1}^0(\text{HS}^0)$  and  $\text{F2}^0(\text{HS}^0)$  for the  $\text{HS}^0$  configuration; they were based on  $\text{F1}^0(\text{LS}^0)$  and  $\text{F2}^0(\text{LS}^0)$  for the  $\text{LS}^0$  configuration; they were based on  $\text{F1}^-(\text{HS}^-)$  and  $\text{F2}^0(\text{HS}^-)$  for the  $\text{HS}^-$  configuration; they were based on  $\text{F1}^-(\text{LS}^-)$  and  $\text{F2}^0(\text{LS}^-)$  for the  $\text{LS}^-$  configuration.

#### 6) Calculation of preparation energy ( $E_{\text{prep}}$ ), through-space interaction energy ( $E_{\text{space}}$ ), and through-bond interaction energy ( $E_{\text{bond}}$ )

$$E_{\text{prep}} = E_{\text{deform}} + E_s \quad --(7)$$

$$E_{\text{space}} = E_{\text{elstat}} + E_{\text{Pauli}} + E_{\text{disp}} \quad --(8)$$

$$E_{\text{orb}} = E_{\text{pol}} + E_{\text{ct}} \quad --(9)$$

#### 7) Calculation of $\delta E_i$ and $\Delta(\delta E_i)$

$$\delta E_i^0 = E_i(\text{HS}^0) - E_i(\text{LS}^0) \quad --(10-1)$$

$$\delta E_i^- = E_i(\text{HS}^-) - E_i(\text{LS}^-) \quad --(10-2)$$

$$\Delta(\delta E_i) = \delta E_i^- - \delta E_i^0 \quad --(11)$$

or

$$\Delta E_i(\text{HS}) = E_i(\text{HS}^-) - E_i(\text{HS}^0) \quad \text{--(10'-1)}$$

$$\Delta E_i(\text{LS}) = E_i(\text{LS}^-) - E_i(\text{LS}^0) \quad \text{--(10'-2)}$$

$$\Delta(\delta E_i) = \Delta E_i(\text{HS}) - \Delta E_i(\text{LS}) \quad \text{--(11')}$$

### References:

- 1 P. R. Horn, Y. Mao and M. Head-Gordon, Defining the contributions of permanent electrostatics, Pauli repulsion, and dispersion in density functional theory calculations of intermolecular interaction energies, *J. Chem. Phys.*, 2016, **144**, 114107.
- 2 R. Z. Khaliullin, E. A. Cobar, R. C. Lochan, A. T. Bell, and M. Head-Gordon, Unravelling the Origin of Intermolecular Interactions Using Absolutely Localized Molecular Orbitals, *J. Phys. Chem. A*, 2007, **111**, 8753–8765.
- 3 A. Grimme, <https://www.chemie.uni-bonn.de/pctc/mulliken-center/software/dft-d3>.

Table S10. Source data for Figure 6a. These data were calculated using equations 10' and 11' shown in the above and data listed in Table S10.

| Energy (kcal/mol)                  | $N_c = 2$ | $N_c = 3$ | $N_c = 4$ | $N_c = 5$ | $N_c = 6$ | $N_c = 7$ |
|------------------------------------|-----------|-----------|-----------|-----------|-----------|-----------|
| $\Delta(\delta E_b)$               | -4.5      | -4.8      | -4.9      | -2.4      | -0.8      | -1.0      |
| $\Delta(\delta E_{\text{prep}})$   | 8.6       | 8.6       | 8.3       | 6.7       | 3.4       | 2.5       |
| $\Delta(\delta E_{\text{space}})$  | 1.5       | 1.8       | 1.7       | 2.5       | 1.8       | 1.6       |
| $\Delta(\delta E_{\text{orb}})$    | -14.6     | -15.2     | -14.9     | -11.6     | -6.0      | -5.1      |
| $\Delta(\delta E_{\text{deform}})$ | 8.6       | 8.6       | 8.3       | 6.7       | 3.4       | 2.5       |
| $\Delta(\delta E_s)$               | 0.0       | 0.0       | 0.0       | 0.0       | 0.0       | 0.0       |
| $\Delta(\delta E_{\text{elstat}})$ | -21.6     | -21.8     | -20.9     | -16.3     | -8.1      | -6.6      |
| $\Delta(\delta E_{\text{Pauli}})$  | 22.6      | 23.1      | 22.0      | 18.2      | 9.4       | 7.8       |
| $\Delta(\delta E_{\text{disp}})$   | 0.5       | 0.5       | 0.6       | 0.6       | 0.5       | 0.4       |
| $\Delta(\delta E_{\text{pol}})$    | -7.2      | -8.3      | -8.1      | -6.8      | -3.7      | -2.8      |
| $\Delta(\delta E_{\text{ct}})$     | -7.4      | -6.9      | -6.8      | -4.8      | -2.3      | -2.3      |

Table S11. The variation of EDA energy terms ( $\Delta E_i$ ) induced by the extra electron in the HS and LS configurations. They were calculated by Eq. 10'-1 and 10'-2 in the above.

| Energy (kcal/mol)          | $N_c = 2$ |       | $N_c = 3$ |       | $N_c = 4$ |       |
|----------------------------|-----------|-------|-----------|-------|-----------|-------|
|                            | HS        | LS    | HS        | LS    | HS        | LS    |
| $\Delta E_b$               | -28.9     | -24.4 | -26.5     | -21.7 | -26.3     | -21.4 |
| $\Delta E_{\text{prep}}$   | 10.8      | 2.2   | 12.2      | 3.6   | 10.9      | 2.6   |
| $\Delta E_{\text{space}}$  | -11.3     | -12.8 | -10.5     | -12.3 | -10.2     | -11.9 |
| $\Delta E_{\text{orb}}$    | -28.4     | -13.8 | -28.2     | -13.0 | -27.0     | -12.1 |
| $\Delta E_{\text{deform}}$ | 10.8      | 2.2   | 12.2      | 3.6   | 10.9      | 2.6   |
| $\Delta E_s$               | 0.0       | 0.0   | 0.0       | 0.0   | 0.0       | 0.0   |
| $\Delta E_{\text{elstat}}$ | -36.0     | -14.4 | -35.4     | -13.6 | -34.1     | -13.2 |
| $\Delta E_{\text{Pauli}}$  | 23.7      | 1.1   | 23.9      | 0.8   | 22.8      | 0.8   |
| $\Delta E_{\text{disp}}$   | 1.0       | 0.5   | 1.0       | 0.5   | 1.1       | 0.5   |
| $\Delta E_{\text{pol}}$    | -21.0     | -13.8 | -21.5     | -13.2 | -20.5     | -12.4 |
| $\Delta E_{\text{ct}}$     | -7.4      | 0.0   | -6.7      | 0.2   | -6.5      | 0.3   |
| Energy (kcal/mol)          | $N_c = 5$ |       | $N_c = 6$ |       | $N_c = 7$ |       |
|                            | HS        | LS    | HS        | LS    | HS        | LS    |
| $\Delta E_b$               | -16.2     | -13.8 | -10.7     | -9.8  | -9.3      | -8.3  |

|                            |       |      |       |      |       |      |
|----------------------------|-------|------|-------|------|-------|------|
| $\Delta E_{\text{prep}}$   | 10.2  | 3.5  | 5.5   | 2.1  | 4.2   | 1.7  |
| $\Delta E_{\text{space}}$  | -6.2  | -8.7 | -5.5  | -7.3 | -4.8  | -6.4 |
| $\Delta E_{\text{orb}}$    | -20.2 | -8.6 | -10.7 | -4.7 | -8.7  | -3.6 |
| $\Delta E_{\text{deform}}$ | 10.2  | 3.5  | 5.5   | 2.1  | 4.2   | 1.7  |
| $\Delta E_{\text{s}}$      | 0.0   | 0.0  | 0.0   | 0.0  | 0.0   | 0.0  |
| $\Delta E_{\text{elstat}}$ | -22.9 | -6.6 | -12.7 | -4.6 | -10.5 | -3.9 |
| $\Delta E_{\text{Pauli}}$  | 15.7  | -2.5 | 6.4   | -3.0 | 5.0   | -2.8 |
| $\Delta E_{\text{disp}}$   | 1.0   | 0.4  | 0.8   | 0.3  | 0.7   | 0.3  |
| $\Delta E_{\text{pol}}$    | -16.2 | -9.4 | -9.7  | -6.0 | -7.8  | -5.0 |
| $\Delta E_{\text{ct}}$     | -4.0  | 0.8  | -1.0  | 1.3  | -0.9  | 1.4  |

Table S12. Energy decomposition analysis of  $\Delta(\delta E_{\text{b}})$  for  $N_{\text{c}} = 2$  and for  $N_{\text{c}} = 4, 6$  in Fig. S6.

| $N_{\text{c}}$ | $\Delta(\delta E_{\text{b}})$ | $\Delta(\delta E_{\text{prep}})$ | $\Delta(\delta E_{\text{space}})$ | $\Delta(\delta E_{\text{orb}})$ |
|----------------|-------------------------------|----------------------------------|-----------------------------------|---------------------------------|
| 2              | -4.6                          | 8.8                              | 1.5                               | -14.9                           |
| 4              | -1.0                          | 3.7                              | 1.0                               | -5.7                            |
| 6              | -2.0                          | 3.6                              | 1.5                               | -7.1                            |

### S3. Cartesian coordinates of involved molecular systems (Unit = Å)

1) Neutral LS configuration for  $N_{\text{c}} = 2$ , Charge = 0,  $S = 0$  ( $S$  is the spin quantum number)

|   |             |             |             |
|---|-------------|-------------|-------------|
| H | -0.43242700 | 3.59190400  | 0.26848300  |
| H | -1.29363800 | 3.89759500  | 2.07607100  |
| H | -3.11402400 | -0.59216400 | -0.40855600 |
| H | -5.09092300 | 1.10010700  | 0.48013700  |
| H | -3.65665500 | 3.22335400  | 1.56404300  |
| H | 0.63500300  | 3.56535400  | 3.66186300  |
| H | 2.58209800  | 1.67913500  | 4.27702900  |
| H | 2.30504700  | -0.18137500 | 2.25337800  |
| B | -0.84926700 | 3.06471100  | 1.29578400  |
| C | -3.00902700 | 0.37936500  | 0.06530000  |
| C | -4.01311800 | 1.24025600  | 0.53092000  |
| C | -3.31293400 | 2.30947000  | 1.08394500  |
| C | 0.91937000  | 2.64974100  | 3.14720800  |
| C | 1.89128100  | 1.69515800  | 3.43652700  |
| C | 1.76508000  | 0.74949100  | 2.40787200  |
| N | -1.79511100 | 0.89653100  | 0.31519400  |
| N | 0.79603800  | 1.11986200  | 1.55623800  |
| N | -1.99240100 | 2.07856900  | 0.93940000  |
| N | 0.27793400  | 2.28237800  | 2.01820000  |
| H | 0.43372300  | -3.59368300 | -0.25618400 |
| H | 1.59257000  | -4.11077200 | 1.32249000  |
| H | 3.00236000  | 0.66919400  | -0.87110400 |
| H | 5.08457300  | -1.09897800 | -0.55565900 |
| H | 3.83751500  | -3.35372900 | 0.49359100  |
| H | -0.02710300 | -3.99756000 | 3.24811900  |
| H | -1.81385400 | -2.22099600 | 4.42239900  |
| H | -1.87178300 | -0.12170900 | 2.62722200  |
| B | 1.02841400  | -3.19284200 | 0.74014200  |
| C | 2.97060400  | -0.35409500 | -0.50868100 |
| C | 4.03068500  | -1.25529200 | -0.33481500 |
| C | 3.42568800  | -2.39137900 | 0.19676800  |
| C | -0.38600200 | -3.02818300 | 2.90815800  |
| C | -1.28077600 | -2.12623600 | 3.47859100  |
| C | -1.32467100 | -1.05935700 | 2.56854000  |

|    |             |             |             |
|----|-------------|-------------|-------------|
| N  | 1.81317800  | -0.91039300 | -0.11571600 |
| N  | -0.52403400 | -1.31214300 | 1.52138400  |
| N  | 2.10293400  | -2.15803000 | 0.31468200  |
| N  | 0.05270100  | -2.51776900 | 1.73850700  |
| Fe | 0.00805400  | -0.00576500 | 0.08731100  |
| H  | 1.52692900  | 2.61436400  | -0.26457300 |
| H  | 2.12661500  | 4.06188100  | -2.21446000 |
| H  | 1.39317400  | 3.33787600  | -4.52541400 |
| H  | 0.11485700  | 1.20690800  | -4.75644100 |
| H  | -0.95583300 | -0.60855500 | -4.77599300 |
| H  | -2.19717200 | -2.76581200 | -4.59214000 |
| H  | -2.52303400 | -3.77996100 | -2.29694200 |
| H  | -1.57604700 | -2.57975600 | -0.31715100 |
| C  | 1.21635300  | 2.35137700  | -1.27420000 |
| C  | 1.55586000  | 3.14359000  | -2.36921100 |
| C  | 1.14960800  | 2.74057700  | -3.64259000 |
| C  | 0.43214200  | 1.55277000  | -3.77194900 |
| C  | 0.13134900  | 0.80543200  | -2.62686600 |
| C  | -0.59557300 | -0.47533800 | -2.64315600 |
| C  | -1.09992000 | -1.07773500 | -3.80201900 |
| C  | -1.79657600 | -2.28032900 | -3.69810400 |
| C  | -1.97827900 | -2.84318800 | -2.43354900 |
| C  | -1.44408200 | -2.18960200 | -1.32477300 |
| N  | 0.51201400  | 1.21780200  | -1.39428300 |
| N  | -0.75948700 | -1.04202800 | -1.42401600 |

2) Reduced LS configuration for  $N_c = 2$ , Charge =  $-1$ ,  $S = 1/2$

|   |             |             |             |
|---|-------------|-------------|-------------|
| H | -0.45115200 | 3.64902300  | 0.47243500  |
| H | -1.34718200 | 3.77934400  | 2.29109500  |
| H | -3.07013700 | -0.48279900 | -0.62100200 |
| H | -5.08513500 | 1.17056100  | 0.29527400  |
| H | -3.68138700 | 3.18749600  | 1.60532800  |
| H | 0.61512400  | 3.42843900  | 3.81067800  |
| H | 2.65297300  | 1.59040700  | 4.27671200  |
| H | 2.38931900  | -0.16880000 | 2.15751300  |
| B | -0.87508100 | 3.02510100  | 1.44025300  |
| C | -2.99108800 | 0.44418000  | -0.06054700 |
| C | -4.00947400 | 1.28731800  | 0.41603800  |
| C | -3.32698600 | 2.30202300  | 1.08109700  |
| C | 0.92168700  | 2.55142400  | 3.24380900  |
| C | 1.93844700  | 1.62397800  | 3.45595500  |
| C | 1.81926500  | 0.73015700  | 2.37810400  |
| N | -1.78887000 | 0.92059700  | 0.29207100  |
| N | 0.81260900  | 1.10363200  | 1.57477600  |
| N | -2.00198300 | 2.05873900  | 0.98801000  |
| N | 0.26541700  | 2.21607000  | 2.11229900  |
| H | 0.48644500  | -3.67495300 | -0.06793400 |
| H | 1.68469700  | -4.01920500 | 1.53604600  |
| H | 2.92046000  | 0.58938000  | -1.08073900 |
| H | 5.04589200  | -1.14308000 | -0.74244600 |
| H | 3.86977900  | -3.32221100 | 0.53149100  |
| H | 0.02271600  | -3.87938600 | 3.40675300  |
| H | -1.88226700 | -2.13532300 | 4.44492400  |
| H | -1.97446900 | -0.12570700 | 2.54552900  |
| B | 1.07967700  | -3.17073400 | 0.88049500  |
| C | 2.93002700  | -0.40092400 | -0.63484100 |
| C | 4.00651400  | -1.28561200 | -0.45151400 |

|    |             |             |             |
|----|-------------|-------------|-------------|
| C  | 3.43921400  | -2.38241900 | 0.19107000  |
| C  | -0.36877900 | -2.94261300 | 3.01476000  |
| C  | -1.32269000 | -2.05962700 | 3.51408800  |
| C  | -1.38419900 | -1.03856000 | 2.55048900  |
| N  | 1.80244100  | -0.93055200 | -0.14018100 |
| N  | -0.53770600 | -1.29914600 | 1.54365100  |
| N  | 2.12103800  | -2.14385300 | 0.36127100  |
| N  | 0.08301800  | -2.46322300 | 1.83599000  |
| Fe | 0.00674100  | -0.00502100 | 0.07644600  |
| H  | 1.49972500  | 2.65228000  | -0.28754700 |
| H  | 2.11330100  | 4.09237800  | -2.23349000 |
| H  | 1.37915900  | 3.33836100  | -4.56358000 |
| H  | 0.10971000  | 1.22333500  | -4.79002800 |
| H  | -0.95470800 | -0.62328500 | -4.81183800 |
| H  | -2.18880600 | -2.76350200 | -4.63128200 |
| H  | -2.51474800 | -3.80772200 | -2.32040800 |
| H  | -1.55614400 | -2.61293200 | -0.34795700 |
| C  | 1.20088300  | 2.37268200  | -1.29940100 |
| C  | 1.55097400  | 3.16863600  | -2.38662100 |
| C  | 1.13687800  | 2.74302700  | -3.67641500 |
| C  | 0.42810900  | 1.56853300  | -3.80365100 |
| C  | 0.11242200  | 0.78717900  | -2.65212100 |
| C  | -0.58064200 | -0.45499500 | -2.66879400 |
| C  | -1.10043500 | -1.09125200 | -3.83549100 |
| C  | -1.78927400 | -2.27994200 | -3.73310000 |
| C  | -1.97740800 | -2.86618900 | -2.45360500 |
| C  | -1.43477700 | -2.20712700 | -1.35390100 |
| N  | 0.50998500  | 1.23430500  | -1.39873500 |
| N  | -0.75912000 | -1.05789400 | -1.43032800 |

3) Neutral HS configuration for  $N_c = 2$ , Charge = 0,  $S = 2$

|   |             |             |             |
|---|-------------|-------------|-------------|
| H | -0.49934500 | 3.48736400  | 0.10025900  |
| H | -1.35090100 | 4.12043900  | 1.83875100  |
| H | -3.26544900 | -0.63236100 | -0.01936300 |
| H | -5.20462300 | 1.07181500  | 0.97380300  |
| H | -3.73353400 | 3.30105700  | 1.74323200  |
| H | 0.34752600  | 3.81610100  | 3.67509500  |
| H | 2.37344800  | 2.08448400  | 4.45978500  |
| H | 2.37894100  | 0.18459800  | 2.43953000  |
| B | -0.93283900 | 3.16183300  | 1.20082100  |
| C | -3.15394600 | 0.37398600  | 0.38090900  |
| C | -4.13214700 | 1.23911200  | 0.89432600  |
| C | -3.41040000 | 2.36625600  | 1.28900200  |
| C | 0.72626000  | 2.91398000  | 3.19809600  |
| C | 1.74315400  | 2.03468400  | 3.57400600  |
| C | 1.75812300  | 1.07208500  | 2.55453000  |
| N | -1.94089400 | 0.94077900  | 0.45493200  |
| N | 0.82569600  | 1.35993900  | 1.63252500  |
| N | -2.10789800 | 2.16025400  | 1.01259300  |
| N | 0.19384200  | 2.48760200  | 2.03688000  |
| H | 0.47314900  | -3.46714000 | -0.38400100 |
| H | 1.62692100  | -4.27974500 | 1.08446100  |
| H | 3.20878300  | 0.67085000  | -0.55723300 |
| H | 5.28210600  | -1.11070300 | -0.13438900 |
| H | 3.95778200  | -3.42757300 | 0.64263500  |
| H | 0.29914100  | -4.20425400 | 3.22408700  |
| H | -1.52616500 | -2.59281700 | 4.56206500  |

|    |             |             |             |
|----|-------------|-------------|-------------|
| H  | -1.88410400 | -0.47594800 | 2.80652800  |
| B  | 1.10674200  | -3.26096900 | 0.64610900  |
| C  | 3.16380300  | -0.37475400 | -0.25709500 |
| C  | 4.21190600  | -1.28021700 | -0.03218800 |
| C  | 3.56503500  | -2.45204800 | 0.36212300  |
| C  | -0.15114700 | -3.25762800 | 2.93094800  |
| C  | -1.07052500 | -2.43666800 | 3.58617500  |
| C  | -1.26309700 | -1.36472500 | 2.70299600  |
| N  | 1.98009800  | -0.95983400 | -0.02321500 |
| N  | -0.52116400 | -1.53698100 | 1.59744300  |
| N  | 2.23584700  | -2.23143400 | 0.35571600  |
| N  | 0.16168100  | -2.69699600 | 1.74707300  |
| Fe | 0.01596300  | -0.00762000 | 0.18122300  |
| H  | 1.58148500  | 2.62211500  | -0.52993600 |
| H  | 2.23543300  | 3.99453100  | -2.53871900 |
| H  | 1.46346800  | 3.21405100  | -4.81513800 |
| H  | 0.10839600  | 1.13435200  | -4.97767400 |
| H  | -1.03139300 | -0.59773900 | -4.96489600 |
| H  | -2.35491800 | -2.69573100 | -4.77810800 |
| H  | -2.70842400 | -3.71794200 | -2.49398700 |
| H  | -1.68679300 | -2.55804800 | -0.50470200 |
| C  | 1.27897800  | 2.33309200  | -1.53880800 |
| C  | 1.63841300  | 3.08751200  | -2.65750300 |
| C  | 1.20901800  | 2.65290700  | -3.91150200 |
| C  | 0.44759100  | 1.48708200  | -4.00324400 |
| C  | 0.13351400  | 0.78360000  | -2.83230300 |
| C  | -0.66321900 | -0.47439300 | -2.82586100 |
| C  | -1.19155900 | -1.05398800 | -3.98756600 |
| C  | -1.93514000 | -2.23010800 | -3.88191500 |
| C  | -2.13398000 | -2.79789600 | -2.62341500 |
| C  | -1.56978800 | -2.16184900 | -1.51575300 |
| N  | 0.55018800  | 1.22059800  | -1.63138900 |
| N  | -0.85903800 | -1.03894500 | -1.62180200 |

4) Reduced HS configuration for  $N_c = 2$ , Charge =  $-1$ ,  $S = 3/2$

|   |             |             |             |
|---|-------------|-------------|-------------|
| H | -0.49739600 | 3.55860200  | 0.38279700  |
| H | -1.37005300 | 3.95180000  | 2.18914000  |
| H | -3.25947800 | -0.48920100 | -0.33565500 |
| H | -5.22886600 | 1.10769400  | 0.79984700  |
| H | -3.75963900 | 3.19862000  | 1.90093500  |
| H | 0.25900400  | 3.37525400  | 3.99849700  |
| H | 2.31101400  | 1.58162200  | 4.55897100  |
| H | 2.39750300  | 0.01698000  | 2.26988000  |
| B | -0.94270000 | 3.08786900  | 1.42371100  |
| C | -3.16128200 | 0.45124700  | 0.20457300  |
| C | -4.15110000 | 1.26315700  | 0.78783000  |
| C | -3.43269200 | 2.31893700  | 1.34906600  |
| C | 0.67154800  | 2.56439500  | 3.40059100  |
| C | 1.70020500  | 1.65896600  | 3.66086500  |
| C | 1.75807400  | 0.86689800  | 2.50180900  |
| N | -1.94924400 | 0.98210600  | 0.40134700  |
| N | 0.84034900  | 1.27309400  | 1.61444200  |
| N | -2.12106300 | 2.12368000  | 1.09816100  |
| N | 0.17706300  | 2.30999200  | 2.17209400  |
| H | 0.53490300  | -3.57292200 | -0.11233100 |
| H | 1.72083000  | -4.15177000 | 1.44902800  |
| H | 3.14932700  | 0.56281500  | -0.87476900 |

|    |             |             |             |
|----|-------------|-------------|-------------|
| H  | 5.28138300  | -1.12307700 | -0.30062600 |
| H  | 4.02318200  | -3.34024000 | 0.81482800  |
| H  | 0.45614000  | -3.79872900 | 3.57860100  |
| H  | -1.44639700 | -2.10590200 | 4.69952700  |
| H  | -1.94004800 | -0.30027300 | 2.65206800  |
| B  | 1.16710700  | -3.21427400 | 0.87511300  |
| C  | 3.14468700  | -0.43223200 | -0.43230400 |
| C  | 4.21852400  | -1.29010900 | -0.13233600 |
| C  | 3.60724100  | -2.40987000 | 0.43181900  |
| C  | -0.05345800 | -2.93276000 | 3.15957200  |
| C  | -1.01092500 | -2.07561700 | 3.70197400  |
| C  | -1.27461200 | -1.16164600 | 2.66789200  |
| N  | 1.98529200  | -0.99687100 | -0.07660200 |
| N  | -0.53755300 | -1.45505900 | 1.58840500  |
| N  | 2.27332100  | -2.20527000 | 0.44782000  |
| N  | 0.20946200  | -2.53799400 | 1.89722700  |
| Fe | 0.00073600  | 0.00101700  | -0.01620100 |
| H  | 1.53921500  | 2.65485200  | -0.62206500 |
| H  | 2.19367900  | 4.02997000  | -2.61200100 |
| H  | 1.43375100  | 3.23314700  | -4.91808700 |
| H  | 0.09905100  | 1.15701500  | -5.08762500 |
| H  | -1.06889600 | -0.59582000 | -5.07247600 |
| H  | -2.36898800 | -2.69185300 | -4.88050900 |
| H  | -2.68533500 | -3.74407900 | -2.57336000 |
| H  | -1.65043900 | -2.58772400 | -0.60555000 |
| C  | 1.24633000  | 2.35485500  | -1.63366300 |
| C  | 1.60881900  | 3.11548100  | -2.73682400 |
| C  | 1.17850800  | 2.66785800  | -4.01534800 |
| C  | 0.43301100  | 1.51141900  | -4.10966600 |
| C  | 0.10105800  | 0.77059000  | -2.93977200 |
| C  | -0.65840600 | -0.44692900 | -2.93419900 |
| C  | -1.21449200 | -1.05864800 | -4.09363700 |
| C  | -1.94072700 | -2.22617300 | -3.98642800 |
| C  | -2.12498000 | -2.81548600 | -2.70623300 |
| C  | -1.55142800 | -2.17644100 | -1.61554700 |
| N  | 0.52864900  | 1.22725800  | -1.70723800 |
| N  | -0.84876800 | -1.04021700 | -1.70042400 |

5) Neutral LS configuration for  $N_c = 3$ , Charge = 0,  $S = 0$

|   |             |             |             |
|---|-------------|-------------|-------------|
| H | 3.51760600  | 0.88438100  | -0.17076500 |
| H | 3.99370100  | 1.99521900  | 1.45349800  |
| H | -1.05288300 | 2.94937000  | -0.35238000 |
| H | 0.47892400  | 5.20866200  | -0.00499400 |
| H | 2.92983200  | 4.18148400  | 0.81754600  |
| H | 4.19791300  | 0.25037300  | 3.25867300  |
| H | 2.71123500  | -1.79347400 | 4.41563200  |
| H | 0.51362200  | -1.98124900 | 2.75007900  |
| B | 3.11231800  | 1.36247100  | 0.88520200  |
| C | -0.01019900 | 3.02118600  | -0.05711900 |
| C | 0.77146100  | 4.16981600  | 0.13326900  |
| C | 2.00404700  | 3.67519800  | 0.55211200  |
| C | 3.25313700  | -0.19549000 | 2.95422100  |
| C | 2.49500300  | -1.21905600 | 3.51716700  |
| C | 1.37987500  | -1.32876400 | 2.67265100  |
| N | 0.70289800  | 1.91811200  | 0.22117900  |
| N | 1.47244100  | -0.44348400 | 1.66840600  |
| N | 1.93482600  | 2.32914000  | 0.59373900  |

|    |             |             |             |
|----|-------------|-------------|-------------|
| N  | 2.61978500  | 0.25204300  | 1.84958500  |
| H  | -3.47795100 | -0.87440700 | 0.60520100  |
| H  | -3.60598900 | -1.87141000 | 2.36264400  |
| H  | 0.97824300  | -2.97621100 | -0.35770500 |
| H  | -0.43542100 | -5.19750600 | 0.44197000  |
| H  | -2.67787700 | -4.10199800 | 1.67072200  |
| H  | -3.45380400 | -0.00782900 | 4.05017300  |
| H  | -1.77925300 | 2.09995300  | 4.74240500  |
| H  | 0.03471500  | 2.16126000  | 2.65788300  |
| B  | -2.86309600 | -1.28366000 | 1.58623300  |
| C  | 0.01686200  | -3.02159900 | 0.14550400  |
| C  | -0.70182100 | -4.14989700 | 0.56623800  |
| C  | -1.82840300 | -3.62051600 | 1.19069400  |
| C  | -2.59345500 | 0.41055400  | 3.53167300  |
| C  | -1.74482900 | 1.46494300  | 3.85949700  |
| C  | -0.82435800 | 1.51047500  | 2.80145800  |
| N  | -0.63382500 | -1.89787900 | 0.48693200  |
| N  | -1.11149700 | 0.56014000  | 1.89855500  |
| N  | -1.76228500 | -2.27516500 | 1.12696300  |
| N  | -2.19320800 | -0.11442200 | 2.35445500  |
| Fe | 0.03341100  | 0.00982600  | 0.34604200  |
| H  | 2.81382600  | -1.23764700 | -0.36648300 |
| H  | 3.92875700  | -1.84827400 | -2.52321400 |
| H  | 2.70588200  | -1.47310700 | -4.68909300 |
| H  | 0.55099600  | -0.66183700 | -5.83971900 |
| H  | -1.72484400 | 0.28980600  | -5.63831500 |
| H  | -3.60920700 | 1.18553800  | -4.13083900 |
| H  | -4.37349800 | 1.70386100  | -1.79109400 |
| H  | -2.84307200 | 1.22382700  | 0.13104000  |
| C  | 2.31195500  | -1.06940800 | -1.31861000 |
| C  | 2.92388700  | -1.42023100 | -2.53805300 |
| C  | 2.24975300  | -1.21324800 | -3.72939300 |
| C  | 0.94732400  | -0.66381700 | -3.69462100 |
| C  | 0.41731600  | -0.34727400 | -2.42071900 |
| C  | 0.13770100  | -0.41861300 | -4.85678400 |
| C  | -2.54222500 | 0.99237500  | -0.89005700 |
| C  | -3.38944200 | 1.26936000  | -1.98095300 |
| C  | -2.96758800 | 0.98361600  | -3.26819400 |
| C  | -1.68131900 | 0.42914900  | -3.46180600 |
| C  | -0.90367100 | 0.19013100  | -2.30332300 |
| C  | -1.12062800 | 0.10618300  | -4.74537800 |
| N  | 1.09638800  | -0.53527400 | -1.25930800 |
| N  | -1.33608800 | 0.45548600  | -1.04316500 |

6) Reduced LS configuration for  $N_c = 3$ , Charge =  $-1$ ,  $S = 1/2$

|   |             |             |             |
|---|-------------|-------------|-------------|
| H | 3.59412500  | 0.93484200  | 0.00788000  |
| H | 3.90954000  | 2.06082800  | 1.66880200  |
| H | -0.98513600 | 2.89790000  | -0.55741300 |
| H | 0.50488800  | 5.19287500  | -0.16984300 |
| H | 2.89214500  | 4.21006300  | 0.87361900  |
| H | 4.08765900  | 0.27718300  | 3.42281700  |
| H | 2.63532700  | -1.86981100 | 4.43719600  |
| H | 0.52182100  | -2.07428500 | 2.66224600  |
| B | 3.09227700  | 1.40274200  | 1.02504100  |
| C | 0.02654600  | 2.99956200  | -0.17555900 |
| C | 0.78897400  | 4.16162800  | 0.03273800  |
| C | 1.98796400  | 3.69118600  | 0.56105100  |



|    |             |             |             |
|----|-------------|-------------|-------------|
| C  | 3.17433400  | -0.19327500 | 3.06369300  |
| C  | 2.43578400  | -1.26801900 | 3.55213900  |
| C  | 1.36366900  | -1.38647000 | 2.65134100  |
| N  | 0.71965200  | 1.91502100  | 0.19833100  |
| N  | 1.46220600  | -0.45813400 | 1.68878800  |
| N  | 1.91922000  | 2.34527300  | 0.64599300  |
| N  | 2.56945300  | 0.27102100  | 1.94921800  |
| H  | -3.51541700 | -0.90843500 | 0.79613400  |
| H  | -3.48069900 | -1.92019700 | 2.55695000  |
| H  | 0.86737700  | -2.93577700 | -0.55390100 |
| H  | -0.49927700 | -5.18983500 | 0.27633700  |
| H  | -2.63175400 | -4.12378000 | 1.71499300  |
| H  | -3.31265300 | -0.02366600 | 4.18921700  |
| H  | -1.69755200 | 2.17367200  | 4.74688400  |
| H  | 0.01275200  | 2.24573300  | 2.57225500  |
| B  | -2.81493300 | -1.31149100 | 1.71929500  |
| C  | -0.04537200 | -3.00508000 | 0.03068600  |
| C  | -0.74272200 | -4.14553700 | 0.46446100  |
| C  | -1.81274400 | -3.63296600 | 1.19268900  |
| C  | -2.49351200 | 0.41550400  | 3.62300100  |
| C  | -1.67754100 | 1.51402800  | 3.88099400  |
| C  | -0.81029000 | 1.56541300  | 2.77640200  |
| N  | -0.65495500 | -1.89349300 | 0.46561000  |
| N  | -1.09613000 | 0.57723700  | 1.91625700  |
| N  | -1.73646700 | -2.28490600 | 1.17388500  |
| N  | -2.12368800 | -0.12493600 | 2.44204600  |
| Fe | 0.03269000  | 0.01067500  | 0.33397700  |
| H  | 2.84534100  | -1.21467900 | -0.40192500 |
| H  | 3.94595500  | -1.84995900 | -2.54432300 |
| H  | 2.69014400  | -1.48264600 | -4.73176300 |
| H  | 0.54260400  | -0.66877300 | -5.87134300 |
| H  | -1.72568000 | 0.28277500  | -5.67119400 |
| H  | -3.60398200 | 1.18464100  | -4.17732300 |
| H  | -4.39425700 | 1.70372800  | -1.81028100 |
| H  | -2.87926100 | 1.20370700  | 0.10257500  |
| C  | 2.33004600  | -1.06216800 | -1.35253600 |
| C  | 2.93946300  | -1.42505100 | -2.55682400 |
| C  | 2.24040000  | -1.21830000 | -3.76868100 |
| C  | 0.95695600  | -0.67332800 | -3.72727300 |
| C  | 0.40118800  | -0.34054100 | -2.44685900 |
| C  | 0.13317700  | -0.42407400 | -4.88474200 |
| C  | -2.56558200 | 0.98534500  | -0.92038500 |
| C  | -3.40819900 | 1.27220100  | -1.99790600 |
| C  | -2.96709500 | 0.98135800  | -3.30972600 |
| C  | -1.69811300 | 0.43167400  | -3.49271500 |
| C  | -0.89280500 | 0.18035800  | -2.33194300 |
| C  | -1.12362000 | 0.10100300  | -4.77376700 |
| N  | 1.10881700  | -0.53104000 | -1.26932200 |
| N  | -1.34915300 | 0.45266700  | -1.05084200 |

7) Neutral HS configuration for  $N_c = 3$ , Charge = 0,  $S = 2$

|   |             |            |             |
|---|-------------|------------|-------------|
| H | 3.41055800  | 0.86698600 | -0.26672800 |
| H | 4.17259300  | 2.00245500 | 1.24168300  |
| H | -0.99558000 | 3.14667300 | -0.05640200 |
| H | 0.58454600  | 5.36849700 | 0.41913100  |
| H | 3.06336900  | 4.25162900 | 0.99540400  |
| H | 4.36878300  | 0.51955300 | 3.26583500  |

|    |             |             |             |
|----|-------------|-------------|-------------|
| H  | 3.03738600  | -1.55666800 | 4.54433700  |
| H  | 0.85874200  | -2.00588900 | 2.88767600  |
| B  | 3.19221900  | 1.40492100  | 0.81436800  |
| C  | 0.06384000  | 3.19581900  | 0.19022100  |
| C  | 0.86796800  | 4.31793400  | 0.44146000  |
| C  | 2.11961300  | 3.77564800  | 0.73586900  |
| C  | 3.45512500  | -0.00479900 | 2.99186200  |
| C  | 2.77416400  | -1.05028700 | 3.61770500  |
| C  | 1.67242200  | -1.28922400 | 2.78377300  |
| N  | 0.77928600  | 2.06888200  | 0.31671000  |
| N  | 1.69830300  | -0.45495500 | 1.73247700  |
| N  | 2.03673100  | 2.43343300  | 0.65131200  |
| N  | 2.79119500  | 0.33286600  | 1.86970100  |
| H  | -3.39040200 | -0.85985400 | 0.48582900  |
| H  | -3.82463400 | -1.88905000 | 2.18797100  |
| H  | 0.98204400  | -3.15040900 | -0.05024400 |
| H  | -0.45467400 | -5.32581700 | 0.87846800  |
| H  | -2.77315600 | -4.15716900 | 1.86991000  |
| H  | -3.61719000 | -0.27576200 | 4.10881600  |
| H  | -2.06967100 | 1.87164900  | 4.95244900  |
| H  | -0.27437800 | 2.19727400  | 2.86352500  |
| B  | -2.95470300 | -1.32737700 | 1.53335500  |
| C  | -0.00529500 | -3.17620900 | 0.40811900  |
| C  | -0.73464900 | -4.27414800 | 0.88919000  |
| C  | -1.90449000 | -3.70543600 | 1.39457100  |
| C  | -2.78157300 | 0.22367100  | 3.62189800  |
| C  | -1.99565700 | 1.30378100  | 4.02702800  |
| C  | -1.08700300 | 1.48036200  | 2.97367700  |
| N  | -0.68782300 | -2.03863800 | 0.60290500  |
| N  | -1.31895000 | 0.57897300  | 2.00643400  |
| N  | -1.84924400 | -2.37217100 | 1.20778100  |
| N  | -2.35589700 | -0.19121800 | 2.41329200  |
| Fe | 0.04396100  | 0.01451500  | 0.44278100  |
| H  | 2.78320400  | -1.36054600 | -0.58542700 |
| H  | 3.84798900  | -2.04399600 | -2.76436800 |
| H  | 2.59771300  | -1.62365400 | -4.90505000 |
| H  | 0.50532900  | -0.72986100 | -6.03469900 |
| H  | -1.72418400 | 0.33168100  | -5.84203400 |
| H  | -3.55070000 | 1.31251800  | -4.37396000 |
| H  | -4.34462800 | 1.88217200  | -2.05716400 |
| H  | -2.85604300 | 1.33767900  | -0.09848300 |
| C  | 2.27195100  | -1.19701100 | -1.53710400 |
| C  | 2.86005000  | -1.57777300 | -2.76139900 |
| C  | 2.17047600  | -1.34448200 | -3.93713200 |
| C  | 0.89344200  | -0.73652100 | -3.88840700 |
| C  | 0.38895000  | -0.39430300 | -2.60705100 |
| C  | 0.10144900  | -0.46021400 | -5.05468600 |
| C  | -2.54688400 | 1.10809600  | -1.12100700 |
| C  | -3.37331100 | 1.41067000  | -2.22337700 |
| C  | -2.93441700 | 1.09533900  | -3.49625600 |
| C  | -1.66976900 | 0.48344800  | -3.66688900 |
| C  | -0.91397000 | 0.22367300  | -2.49437500 |
| C  | -1.12842300 | 0.12496600  | -4.94839300 |
| N  | 1.08061600  | -0.62588000 | -1.47048400 |
| N  | -1.36281500 | 0.53474900  | -1.25924800 |

8) Reduced HS configuration for  $N_c = 3$ , Charge =  $-1$ ,  $S = 3/2$

|    |             |             |             |
|----|-------------|-------------|-------------|
| H  | 3.50287000  | 0.92090400  | -0.02686500 |
| H  | 4.06568300  | 2.05476700  | 1.57810200  |
| H  | -0.91925900 | 3.12849700  | -0.33635700 |
| H  | 0.57739500  | 5.38470000  | 0.28932700  |
| H  | 2.98274800  | 4.29659500  | 1.16813300  |
| H  | 4.00158000  | 0.61016000  | 3.61984200  |
| H  | 2.58545300  | -1.52452700 | 4.70550900  |
| H  | 0.68548100  | -2.05333300 | 2.75330600  |
| B  | 3.15118700  | 1.44492600  | 1.02443700  |
| C  | 0.09952600  | 3.20053600  | 0.04169900  |
| C  | 0.86264000  | 4.33663100  | 0.36710700  |
| C  | 2.07523300  | 3.81091400  | 0.81342700  |
| C  | 3.15862300  | 0.04692300  | 3.22313900  |
| C  | 2.43895900  | -1.02636900 | 3.74839900  |
| C  | 1.47879000  | -1.30780500 | 2.76184300  |
| N  | 0.80250200  | 2.08647200  | 0.27409600  |
| N  | 1.61961700  | -0.47258600 | 1.72418400  |
| N  | 2.00889400  | 2.46480700  | 0.74269100  |
| N  | 2.64698900  | 0.35574800  | 2.01423700  |
| H  | -3.43499100 | -0.88535300 | 0.74675300  |
| H  | -3.65517900 | -1.91329600 | 2.49988700  |
| H  | 0.84117100  | -3.14561000 | -0.31656800 |
| H  | -0.48929000 | -5.34664300 | 0.73608300  |
| H  | -2.67060300 | -4.18611600 | 2.01561700  |
| H  | -3.17695000 | -0.34922100 | 4.39411900  |
| H  | -1.57650400 | 1.83523400  | 5.03299200  |
| H  | -0.12145800 | 2.22878800  | 2.70324300  |
| B  | -2.87485900 | -1.34696300 | 1.73498200  |
| C  | -0.07946700 | -3.18579600 | 0.26380300  |
| C  | -0.75668600 | -4.29331400 | 0.80579700  |
| C  | -1.85561400 | -3.73086500 | 1.45541300  |
| C  | -2.43626100 | 0.18199600  | 3.79883400  |
| C  | -1.62829600 | 1.27893400  | 4.09836300  |
| C  | -0.89306200 | 1.49200300  | 2.92004300  |
| N  | -0.72497700 | -2.05357700 | 0.56507700  |
| N  | -1.24124400 | 0.59688500  | 1.98636800  |
| N  | -1.80991100 | -2.39217400 | 1.29048800  |
| N  | -2.18333800 | -0.20360900 | 2.53159900  |
| Fe | 0.02255000  | 0.01041400  | 0.24694000  |
| H  | 2.79537700  | -1.33336500 | -0.67670200 |
| H  | 3.85043000  | -2.04016700 | -2.83018500 |
| H  | 2.58620200  | -1.63874600 | -5.00273500 |
| H  | 0.49342300  | -0.74097400 | -6.13346500 |
| H  | -1.72819700 | 0.32490300  | -5.94411400 |
| H  | -3.55658400 | 1.31300600  | -4.47963200 |
| H  | -4.36006000 | 1.87195400  | -2.12976600 |
| H  | -2.88776800 | 1.30871500  | -0.18967200 |
| C  | 2.27413200  | -1.18640800 | -1.62833100 |
| C  | 2.85969800  | -1.57857500 | -2.83278900 |
| C  | 2.15724700  | -1.35222400 | -4.03664000 |
| C  | 0.89677600  | -0.75006400 | -3.98824300 |
| C  | 0.36420600  | -0.38903700 | -2.70672000 |
| C  | 0.09266400  | -0.46924900 | -5.15050500 |
| C  | -2.56747300 | 1.09336900  | -1.21435900 |
| C  | -3.38663800 | 1.40499300  | -2.30013500 |
| C  | -2.93953000 | 1.09130200  | -3.60241500 |
| C  | -1.69070600 | 0.48554400  | -3.76751600 |
| C  | -0.90806000 | 0.21065600  | -2.59786500 |

|   |             |             |             |
|---|-------------|-------------|-------------|
| C | -1.13544900 | 0.11919000  | -5.04579000 |
| N | 1.07057700  | -0.61328900 | -1.54018900 |
| N | -1.36630600 | 0.51997800  | -1.33116600 |

9) Neutral LS configuration for  $N_c = 4$ , Charge = 0,  $S = 0$

|    |          |          |          |
|----|----------|----------|----------|
| H  | 0.83200  | -3.62400 | -0.23700 |
| H  | 2.53500  | -4.09900 | -1.22400 |
| H  | 0.20400  | 0.45100  | -3.09500 |
| H  | 0.79300  | -1.40900 | -5.03500 |
| H  | 1.85400  | -3.52300 | -3.57200 |
| H  | 4.29300  | -3.78200 | 0.55200  |
| H  | 5.20200  | -1.84000 | 2.32000  |
| H  | 3.29600  | 0.14800  | 2.09100  |
| B  | 1.85200  | -3.19100 | -0.76700 |
| C  | 0.61800  | -0.54500 | -2.97400 |
| C  | 0.93100  | -1.49200 | -3.95900 |
| C  | 1.47100  | -2.55900 | -3.24500 |
| C  | 3.86900  | -2.81600 | 0.81900  |
| C  | 4.30600  | -1.83200 | 1.70200  |
| C  | 3.33900  | -0.82100 | 1.60000  |
| N  | 0.94100  | -1.01200 | -1.75700 |
| N  | 2.38400  | -1.18100 | 0.72800  |
| N  | 1.46300  | -2.24600 | -1.93400 |
| N  | 2.71800  | -2.40200 | 0.24900  |
| H  | 0.83200  | 3.62400  | 0.23700  |
| H  | 2.53500  | 4.09900  | 1.22400  |
| H  | 0.20400  | -0.45100 | 3.09500  |
| H  | 0.79200  | 1.40900  | 5.03500  |
| H  | 1.85400  | 3.52300  | 3.57200  |
| H  | 4.29300  | 3.78200  | -0.55200 |
| H  | 5.20200  | 1.84000  | -2.32000 |
| H  | 3.29600  | -0.14800 | -2.09100 |
| B  | 1.85200  | 3.19100  | 0.76700  |
| C  | 0.61800  | 0.54600  | 2.97300  |
| C  | 0.93100  | 1.49200  | 3.95900  |
| C  | 1.47100  | 2.55900  | 3.24500  |
| C  | 3.86900  | 2.81600  | -0.81900 |
| C  | 4.30600  | 1.83200  | -1.70200 |
| C  | 3.33900  | 0.82100  | -1.60000 |
| N  | 0.94100  | 1.01200  | 1.75700  |
| N  | 2.38500  | 1.18100  | -0.72800 |
| N  | 1.46300  | 2.24600  | 1.93400  |
| N  | 2.71800  | 2.40200  | -0.24900 |
| Fe | 0.93200  | -0.00000 | -0.00000 |
| H  | 0.50300  | -2.54400 | 1.70700  |
| H  | -1.53300 | -3.77600 | 2.50100  |
| H  | -3.78800 | -2.91400 | 1.90700  |
| H  | -3.78800 | 2.91400  | -1.90700 |
| H  | -1.53300 | 3.77600  | -2.50100 |
| H  | 0.50300  | 2.54400  | -1.70700 |
| C  | -0.49700 | -2.20100 | 1.44800  |
| C  | -1.64300 | -2.87300 | 1.89600  |
| C  | -2.89800 | -2.38700 | 1.56100  |
| C  | -3.00800 | -1.21300 | 0.78500  |
| C  | -1.79700 | -0.60900 | 0.38700  |
| C  | -4.27600 | -0.59900 | 0.38700  |
| C  | -0.49700 | 2.20100  | -1.44800 |

|   |          |          |          |
|---|----------|----------|----------|
| C | -1.64300 | 2.87300  | -1.89600 |
| C | -2.89800 | 2.38700  | -1.56100 |
| C | -3.00800 | 1.21300  | -0.78500 |
| C | -1.79700 | 0.60900  | -0.38700 |
| C | -4.27600 | 0.59800  | -0.38800 |
| N | -0.57300 | -1.10200 | 0.70100  |
| N | -0.57300 | 1.10200  | -0.70100 |
| C | -5.51400 | 1.16800  | -0.75600 |
| H | -5.53600 | 2.08400  | -1.34700 |
| C | -5.51400 | -1.16800 | 0.75500  |
| H | -5.53500 | -2.08400 | 1.34700  |
| C | -6.71800 | 0.58900  | -0.38100 |
| H | -7.66200 | 1.05300  | -0.68000 |
| C | -6.71800 | -0.58900 | 0.38100  |
| H | -7.66200 | -1.05300 | 0.68000  |

10) Reduced LS configuration for  $N_c = 4$ , Charge = -1,  $S = 1/2$

|    |          |          |          |
|----|----------|----------|----------|
| H  | -1.00700 | -3.69400 | 0.05200  |
| H  | -2.72600 | -4.08200 | 1.06000  |
| H  | -0.02300 | 0.20000  | 3.05400  |
| H  | -0.63700 | -1.73900 | 4.92300  |
| H  | -1.89700 | -3.69500 | 3.39400  |
| H  | -4.43400 | -3.64000 | -0.72200 |
| H  | -5.22100 | -1.62100 | -2.46900 |
| H  | -3.22600 | 0.27200  | -2.15800 |
| B  | -1.98000 | -3.20800 | 0.62000  |
| C  | -0.51300 | -0.75800 | 2.90800  |
| C  | -0.83700 | -1.74600 | 3.85300  |
| C  | -1.47400 | -2.73400 | 3.10700  |
| C  | -3.96500 | -2.68700 | -0.96100 |
| C  | -4.33900 | -1.66800 | -1.83300 |
| C  | -3.32600 | -0.70400 | -1.68900 |
| N  | -0.92500 | -1.12900 | 1.68700  |
| N  | -2.40900 | -1.12400 | -0.80600 |
| N  | -1.51000 | -2.33900 | 1.81600  |
| N  | -2.80800 | -2.33500 | -0.36100 |
| H  | -1.01000 | 3.69400  | -0.05200 |
| H  | -2.73100 | 4.08100  | -1.05900 |
| H  | -0.02600 | -0.19900 | -3.05500 |
| H  | -0.64600 | 1.73900  | -4.92400 |
| H  | -1.90500 | 3.69400  | -3.39300 |
| H  | -4.43600 | 3.63700  | 0.72600  |
| H  | -5.21900 | 1.61800  | 2.47500  |
| H  | -3.22300 | -0.27300 | 2.16100  |
| B  | -1.98400 | 3.20700  | -0.61900 |
| C  | -0.51700 | 0.75900  | -2.90900 |
| C  | -0.84400 | 1.74600  | -3.85400 |
| C  | -1.48100 | 2.73300  | -3.10700 |
| C  | -3.96600 | 2.68500  | 0.96500  |
| C  | -4.33800 | 1.66500  | 1.83700  |
| C  | -3.32400 | 0.70200  | 1.69200  |
| N  | -0.92800 | 1.12900  | -1.68700 |
| N  | -2.40900 | 1.12200  | 0.80700  |
| N  | -1.51400 | 2.33900  | -1.81600 |
| N  | -2.81000 | 2.33400  | 0.36300  |
| Fe | -0.92700 | 0.00000  | -0.00000 |
| H  | -0.47800 | -2.47600 | -1.84000 |

|   |          |          |          |
|---|----------|----------|----------|
| H | 1.55000  | -3.64000 | -2.72300 |
| H | 3.82500  | -2.78600 | -2.07800 |
| H | 3.82400  | 2.78800  | 2.07500  |
| H | 1.55000  | 3.64300  | 2.71900  |
| H | -0.47800 | 2.47700  | 1.83800  |
| C | 0.52300  | -2.13200 | -1.57100 |
| C | 1.65700  | -2.77200 | -2.06900 |
| C | 2.93100  | -2.28500 | -1.69800 |
| C | 3.03400  | -1.17600 | -0.86300 |
| C | 1.81800  | -0.57100 | -0.40800 |
| C | 4.30000  | -0.57500 | -0.42300 |
| C | 0.52200  | 2.13300  | 1.56800  |
| C | 1.65700  | 2.77500  | 2.06600  |
| C | 2.93100  | 2.28700  | 1.69600  |
| C | 3.03400  | 1.17700  | 0.86200  |
| C | 1.81800  | 0.57200  | 0.40700  |
| C | 4.30000  | 0.57700  | 0.42200  |
| N | 0.57400  | -1.07300 | -0.76400 |
| N | 0.57400  | 1.07400  | 0.76200  |
| C | 5.54400  | 1.11800  | 0.81800  |
| H | 5.55900  | 2.00000  | 1.46200  |
| C | 5.54400  | -1.11700 | -0.81900 |
| H | 5.55900  | -1.99900 | -1.46200 |
| C | 6.75200  | 0.56600  | 0.41400  |
| H | 7.69500  | 1.01500  | 0.74200  |
| C | 6.75200  | -0.56600 | -0.41400 |
| H | 7.69500  | -1.01500 | -0.74100 |

11) Neutral HS configuration for  $N_c = 4$ , Charge = 0,  $S = 2$

|   |         |          |          |
|---|---------|----------|----------|
| H | 0.71700 | -3.52800 | 0.04800  |
| H | 2.33100 | -4.39100 | -0.84300 |
| H | 0.54500 | 0.13300  | -3.30100 |
| H | 1.25000 | -1.90800 | -5.03200 |
| H | 2.04200 | -3.93600 | -3.30500 |
| H | 4.32500 | -3.96700 | 0.63500  |
| H | 5.39000 | -2.01200 | 2.29600  |
| H | 3.49100 | 0.00700  | 2.16900  |
| B | 1.78600 | -3.34200 | -0.52400 |
| C | 0.90100 | -0.87000 | -3.07100 |
| C | 1.26900 | -1.90500 | -3.94400 |
| C | 1.67300 | -2.93500 | -3.09300 |
| C | 3.93800 | -2.98700 | 0.90600  |
| C | 4.45500 | -1.99400 | 1.74000  |
| C | 3.49800 | -0.97000 | 1.68700  |
| N | 1.06500 | -1.25100 | -1.79600 |
| N | 2.48000 | -1.32800 | 0.88900  |
| N | 1.53800 | -2.51700 | -1.81900 |
| N | 2.75900 | -2.56400 | 0.41000  |
| H | 0.72400 | 3.52900  | -0.04800 |
| H | 2.34100 | 4.38900  | 0.84100  |
| H | 0.54800 | -0.13100 | 3.30200  |
| H | 1.26000 | 1.90800  | 5.03200  |
| H | 2.05400 | 3.93500  | 3.30400  |
| H | 4.33200 | 3.96200  | -0.64000 |
| H | 5.39100 | 2.00400  | -2.30200 |
| H | 3.48900 | -0.01100 | -2.17200 |
| B | 1.79300 | 3.34100  | 0.52300  |

|    |          |          |          |
|----|----------|----------|----------|
| C  | 0.90600  | 0.87100  | 3.07200  |
| C  | 1.27700  | 1.90600  | 3.94400  |
| C  | 1.68200  | 2.93400  | 3.09200  |
| C  | 3.94200  | 2.98200  | -0.91000 |
| C  | 4.45600  | 1.98800  | -1.74400 |
| C  | 3.49800  | 0.96600  | -1.69000 |
| N  | 1.06900  | 1.25200  | 1.79600  |
| N  | 2.48200  | 1.32600  | -0.89000 |
| N  | 1.54500  | 2.51600  | 1.81900  |
| N  | 2.76400  | 2.56100  | -0.41200 |
| Fe | 1.04000  | 0.00000  | 0.00000  |
| H  | 0.29700  | -2.34400 | 2.02100  |
| H  | -1.76700 | -3.44500 | 2.97600  |
| H  | -4.00000 | -2.62700 | 2.26500  |
| H  | -4.00000 | 2.62900  | -2.26300 |
| H  | -1.76600 | 3.44700  | -2.97400 |
| H  | 0.29700  | 2.34700  | -2.01800 |
| C  | -0.70600 | -2.01700 | 1.73800  |
| C  | -1.85900 | -2.62100 | 2.26500  |
| C  | -3.10100 | -2.15900 | 1.86200  |
| C  | -3.19800 | -1.09300 | 0.94000  |
| C  | -1.97800 | -0.55300 | 0.47400  |
| C  | -4.46700 | -0.54000 | 0.46400  |
| C  | -0.70600 | 2.01900  | -1.73600 |
| C  | -1.85800 | 2.62300  | -2.26300 |
| C  | -3.10000 | 2.16100  | -1.86000 |
| C  | -3.19800 | 1.09500  | -0.93800 |
| C  | -1.97700 | 0.55500  | -0.47200 |
| C  | -4.46700 | 0.54200  | -0.46300 |
| N  | -0.77600 | -1.01800 | 0.87100  |
| N  | -0.77500 | 1.02000  | -0.86900 |
| C  | -5.70600 | 1.05700  | -0.90400 |
| H  | -5.72900 | 1.88600  | -1.61300 |
| C  | -5.70600 | -1.05500 | 0.90500  |
| H  | -5.72900 | -1.88400 | 1.61400  |
| C  | -6.90900 | 0.53400  | -0.45600 |
| H  | -7.85300 | 0.95400  | -0.81500 |
| C  | -6.91000 | -0.53200 | 0.45700  |
| H  | -7.85400 | -0.95200 | 0.81500  |

12) Reduced HS configuration for  $N_c = 4$ , Charge = -1,  $S = 3/2$

|   |         |          |          |
|---|---------|----------|----------|
| H | 1.00300 | 3.43300  | -1.10800 |
| H | 2.69300 | 4.34400  | -0.40700 |
| H | 0.30300 | 0.94900  | 3.11900  |
| H | 1.14400 | 3.35000  | 4.23400  |
| H | 2.23600 | 4.68700  | 2.05100  |
| H | 4.67300 | 3.29700  | -1.52200 |
| H | 5.53500 | 0.85200  | -2.53200 |
| H | 3.37400 | -0.81400 | -2.02500 |
| B | 2.02800 | 3.30900  | -0.44600 |
| C | 0.78700 | 1.80100  | 2.64300  |
| C | 1.22200 | 3.01700  | 3.20000  |
| C | 1.77600 | 3.70300  | 2.11900  |
| C | 4.17100 | 2.33200  | -1.55900 |
| C | 4.58300 | 1.09800  | -2.06400 |
| C | 3.49100 | 0.24900  | -1.82000 |
| N | 1.05900 | 1.76500  | 1.33400  |

|    |          |          |          |
|----|----------|----------|----------|
| N  | 2.50000  | 0.92500  | -1.22300 |
| N  | 1.66000  | 2.93000  | 1.01900  |
| N  | 2.92400  | 2.19800  | -1.06400 |
| H  | 1.00000  | -3.43200 | 1.10800  |
| H  | 2.68800  | -4.34500 | 0.40600  |
| H  | 0.30000  | -0.94800 | -3.11900 |
| H  | 1.13800  | -3.35000 | -4.23400 |
| H  | 2.23000  | -4.68800 | -2.05200 |
| H  | 4.67000  | -3.30100 | 1.52100  |
| H  | 5.53500  | -0.85700 | 2.53000  |
| H  | 3.37600  | 0.81200  | 2.02400  |
| B  | 2.02400  | -3.31000 | 0.44600  |
| C  | 0.78300  | -1.80000 | -2.64300 |
| C  | 1.21700  | -3.01700 | -3.20000 |
| C  | 1.77100  | -3.70300 | -2.11900 |
| C  | 4.16900  | -2.33500 | 1.55800  |
| C  | 4.58300  | -1.10200 | 2.06200  |
| C  | 3.49100  | -0.25100 | 1.81800  |
| N  | 1.05600  | -1.76500 | -1.33400 |
| N  | 2.49900  | -0.92600 | 1.22200  |
| N  | 1.65600  | -2.93000 | -1.01900 |
| N  | 2.92200  | -2.20000 | 1.06300  |
| Fe | 0.88400  | 0.00000  | 0.00000  |
| H  | 0.23600  | 1.67400  | -2.61500 |
| H  | -1.80700 | 2.41900  | -3.86400 |
| H  | -4.07000 | 1.83000  | -2.94700 |
| H  | -4.07000 | -1.82900 | 2.94800  |
| H  | -1.80700 | -2.41700 | 3.86500  |
| H  | 0.23600  | -1.67200 | 2.61600  |
| C  | -0.76700 | 1.42700  | -2.25300 |
| C  | -1.90300 | 1.83900  | -2.94200 |
| C  | -3.17200 | 1.50500  | -2.41700 |
| C  | -3.26400 | 0.77200  | -1.23400 |
| C  | -2.04500 | 0.38000  | -0.59800 |
| C  | -4.53100 | 0.37800  | -0.60500 |
| C  | -0.76700 | -1.42500 | 2.25400  |
| C  | -1.90300 | -1.83700 | 2.94400  |
| C  | -3.17200 | -1.50400 | 2.41800  |
| C  | -3.26400 | -0.77100 | 1.23500  |
| C  | -2.04500 | -0.37800 | 0.59900  |
| C  | -4.53100 | -0.37700 | 0.60500  |
| N  | -0.81300 | 0.72000  | -1.12100 |
| N  | -0.81300 | -0.71800 | 1.12200  |
| C  | -5.77400 | -0.73300 | 1.17600  |
| H  | -5.79000 | -1.31100 | 2.10200  |
| C  | -5.77400 | 0.73400  | -1.17600 |
| H  | -5.79000 | 1.31200  | -2.10200 |
| C  | -6.98100 | -0.37100 | 0.59600  |
| H  | -7.92500 | -0.66500 | 1.06600  |
| C  | -6.98100 | 0.37200  | -0.59600 |
| H  | -7.92500 | 0.66500  | -1.06600 |

13) Neutral LS configuration for  $N_c = 5$ , Charge = 0,  $S = 0$

|   |          |          |         |
|---|----------|----------|---------|
| H | -1.52500 | -3.56800 | 0.66500 |
| H | -3.22700 | -3.92600 | 1.70300 |
| H | -0.90000 | 0.81600  | 3.02000 |
| H | -1.48700 | -0.80000 | 5.16800 |



|    |          |          |          |
|----|----------|----------|----------|
| H  | -2.54700 | -3.07400 | 3.96600  |
| H  | -4.98800 | -3.82100 | -0.09500 |
| H  | -5.90000 | -2.10200 | -2.08000 |
| H  | -3.99400 | -0.10100 | -2.09100 |
| B  | -2.54500 | -3.07700 | 1.14100  |
| C  | -1.31300 | -0.18800 | 3.01800  |
| C  | -1.62500 | -1.01100 | 4.10900  |
| C  | -2.16400 | -2.15600 | 3.52700  |
| C  | -4.56500 | -2.89300 | -0.47500 |
| C  | -5.00300 | -2.02100 | -1.46900 |
| C  | -4.03600 | -1.00500 | -1.48900 |
| N  | -1.63600 | -0.79600 | 1.86500  |
| N  | -3.08000 | -1.25900 | -0.58200 |
| N  | -2.15600 | -2.00000 | 2.18700  |
| N  | -3.41300 | -2.41500 | 0.04000  |
| H  | -1.52500 | 3.56800  | -0.66500 |
| H  | -3.22700 | 3.92600  | -1.70300 |
| H  | -0.89900 | -0.81600 | -3.02000 |
| H  | -1.48700 | 0.80000  | -5.16800 |
| H  | -2.54700 | 3.07400  | -3.96600 |
| H  | -4.98800 | 3.82100  | 0.09500  |
| H  | -5.90000 | 2.10200  | 2.08000  |
| H  | -3.99400 | 0.10100  | 2.09100  |
| B  | -2.54500 | 3.07800  | -1.14100 |
| C  | -1.31300 | 0.18800  | -3.01800 |
| C  | -1.62500 | 1.01100  | -4.10900 |
| C  | -2.16400 | 2.15600  | -3.52700 |
| C  | -4.56500 | 2.89300  | 0.47500  |
| C  | -5.00300 | 2.02100  | 1.46800  |
| C  | -4.03600 | 1.00500  | 1.48900  |
| N  | -1.63500 | 0.79600  | -1.86500 |
| N  | -3.08000 | 1.25900  | 0.58200  |
| N  | -2.15600 | 2.00000  | -2.18700 |
| N  | -3.41300 | 2.41500  | -0.04000 |
| Fe | -1.62700 | 0.00000  | 0.00000  |
| H  | -1.20400 | -2.72400 | -1.39400 |
| H  | 0.82900  | -4.04500 | -2.04100 |
| H  | 3.08700  | -3.12100 | -1.55500 |
| H  | 3.08700  | 3.12100  | 1.55500  |
| H  | 0.82900  | 4.04500  | 2.04200  |
| H  | -1.20400 | 2.72400  | 1.39400  |
| C  | -0.20200 | -2.35600 | -1.17900 |
| C  | 0.94100  | -3.07700 | -1.54600 |
| C  | 2.19700  | -2.55600 | -1.27200 |
| C  | 2.31000  | -1.30100 | -0.64000 |
| C  | 1.10300  | -0.65200 | -0.31300 |
| C  | 3.58500  | -0.64800 | -0.31900 |
| C  | -0.20200 | 2.35600  | 1.17900  |
| C  | 0.94100  | 3.07700  | 1.54600  |
| C  | 2.19700  | 2.55600  | 1.27200  |
| C  | 2.31000  | 1.30100  | 0.64000  |
| C  | 1.10300  | 0.65200  | 0.31300  |
| C  | 3.58500  | 0.64800  | 0.31900  |
| N  | -0.12200 | -1.17600 | -0.56500 |
| N  | -0.12200 | 1.17600  | 0.56500  |
| C  | 4.80400  | 1.25000  | 0.61400  |
| H  | 4.82800  | 2.23000  | 1.09400  |
| C  | 4.80400  | -1.25000 | -0.61400 |

|   |         |          |          |
|---|---------|----------|----------|
| H | 4.82800 | -2.23000 | -1.09400 |
| C | 6.04200 | -0.64400 | -0.31600 |
| C | 6.04200 | 0.64400  | 0.31600  |
| C | 8.47600 | -0.63900 | -0.31300 |
| H | 9.42800 | -1.12200 | -0.55000 |
| H | 7.28500 | 2.24600  | 1.10200  |
| C | 8.47600 | 0.63900  | 0.31300  |
| H | 9.42800 | 1.12200  | 0.55000  |
| C | 7.28900 | 1.26400  | 0.62000  |
| C | 7.28900 | -1.26400 | -0.62000 |
| H | 7.28600 | -2.24600 | -1.10200 |

14) Reduced LS configuration for  $N_c = 5$ , Charge = -1,  $S = 1/2$

|    |          |          |          |
|----|----------|----------|----------|
| H  | 1.72600  | -3.67100 | -0.45500 |
| H  | 3.44700  | -3.93200 | -1.50000 |
| H  | 0.70900  | 0.52200  | -3.01100 |
| H  | 1.32600  | -1.20000 | -5.07900 |
| H  | 2.60400  | -3.30100 | -3.77400 |
| H  | 5.15100  | -3.67700 | 0.32200  |
| H  | 5.92100  | -1.86100 | 2.28500  |
| H  | 3.91500  | 0.04100  | 2.18400  |
| B  | 2.69500  | -3.11800 | -0.96500 |
| C  | 1.20500  | -0.44300 | -2.97000 |
| C  | 1.53100  | -1.32100 | -4.01700 |
| C  | 2.17700  | -2.37900 | -3.38400 |
| C  | 4.67500  | -2.76000 | 0.66500  |
| C  | 5.04000  | -1.84200 | 1.64600  |
| C  | 4.02100  | -0.87600 | 1.61000  |
| N  | 1.62300  | -0.94000 | -1.79700 |
| N  | 3.10700  | -1.20100 | 0.68300  |
| N  | 2.21600  | -2.12600 | -2.05800 |
| N  | 3.51600  | -2.35200 | 0.10500  |
| H  | 1.72600  | 3.67100  | 0.45500  |
| H  | 3.44700  | 3.93200  | 1.50000  |
| H  | 0.70900  | -0.52200 | 3.01100  |
| H  | 1.32600  | 1.20000  | 5.07900  |
| H  | 2.60400  | 3.30100  | 3.77400  |
| H  | 5.15100  | 3.67700  | -0.32200 |
| H  | 5.92100  | 1.86100  | -2.28500 |
| H  | 3.91500  | -0.04100 | -2.18400 |
| B  | 2.69500  | 3.11800  | 0.96500  |
| C  | 1.20500  | 0.44300  | 2.97000  |
| C  | 1.53100  | 1.32100  | 4.01700  |
| C  | 2.17700  | 2.37900  | 3.38400  |
| C  | 4.67500  | 2.76000  | -0.66500 |
| C  | 5.04000  | 1.84200  | -1.64600 |
| C  | 4.02100  | 0.87600  | -1.61000 |
| N  | 1.62300  | 0.94000  | 1.79700  |
| N  | 3.10700  | 1.20100  | -0.68300 |
| N  | 2.21600  | 2.12600  | 2.05800  |
| N  | 3.51600  | 2.35200  | -0.10500 |
| Fe | 1.62700  | -0.00000 | 0.00000  |
| H  | 1.18500  | -2.66400 | 1.53800  |
| H  | -0.85600 | -3.93400 | 2.26700  |
| H  | -3.11400 | -3.01200 | 1.72600  |
| H  | -3.11400 | 3.01200  | -1.72600 |
| H  | -0.85600 | 3.93400  | -2.26700 |

|   |          |          |          |
|---|----------|----------|----------|
| H | 1.18500  | 2.66400  | -1.53800 |
| C | 0.18600  | -2.29300 | 1.30800  |
| C | -0.96100 | -2.99400 | 1.72100  |
| C | -2.22000 | -2.46900 | 1.41100  |
| C | -2.33700 | -1.26200 | 0.71100  |
| C | -1.10900 | -0.61500 | 0.33900  |
| C | -3.61000 | -0.63300 | 0.35400  |
| C | 0.18600  | 2.29300  | -1.30800 |
| C | -0.96100 | 2.99400  | -1.72100 |
| C | -2.22000 | 2.46900  | -1.41100 |
| C | -2.33700 | 1.26200  | -0.71100 |
| C | -1.10900 | 0.61500  | -0.33900 |
| C | -3.61000 | 0.63300  | -0.35400 |
| N | 0.12600  | -1.15300 | 0.63800  |
| N | 0.12600  | 1.15300  | -0.63800 |
| C | -4.83800 | 1.21500  | -0.67700 |
| H | -4.86200 | 2.16900  | -1.20700 |
| C | -4.83800 | -1.21500 | 0.67700  |
| H | -4.86200 | -2.16900 | 1.20700  |
| C | -6.08400 | -0.62800 | 0.34900  |
| C | -6.08400 | 0.62800  | -0.34900 |
| C | -8.53000 | -0.61700 | 0.34300  |
| H | -9.47900 | -1.09400 | 0.60800  |
| H | -7.32500 | 2.18300  | -1.21300 |
| C | -8.53000 | 0.61700  | -0.34300 |
| H | -9.47900 | 1.09400  | -0.60800 |
| C | -7.32900 | 1.22600  | -0.68100 |
| C | -7.32900 | -1.22600 | 0.68100  |
| H | -7.32500 | -2.18300 | 1.21300  |

15) Neutral HS configuration for  $N_c = 5$ , Charge = 0,  $S = 2$

|   |         |          |          |
|---|---------|----------|----------|
| H | 1.43300 | 3.50600  | 0.39900  |
| H | 3.04900 | 4.24700  | 1.39200  |
| H | 1.25100 | -0.54800 | 3.25900  |
| H | 1.96200 | 1.25500  | 5.23300  |
| H | 2.76100 | 3.48400  | 3.77700  |
| H | 5.04200 | 4.00900  | -0.12800 |
| H | 6.10100 | 2.27800  | -2.02600 |
| H | 4.19800 | 0.26500  | -2.15600 |
| B | 2.50200 | 3.24700  | 0.94300  |
| C | 1.61000 | 0.47500  | 3.15700  |
| C | 1.98100 | 1.39100  | 4.15400  |
| C | 2.38800 | 2.51800  | 3.44000  |
| C | 4.65200 | 3.07200  | -0.52100 |
| C | 5.16600 | 2.19200  | -1.47500 |
| C | 4.20700 | 1.17200  | -1.55300 |
| N | 1.77500 | 1.01400  | 1.94000  |
| N | 3.19100 | 1.42800  | -0.71500 |
| N | 2.25200 | 2.26500  | 2.12300  |
| N | 3.47300 | 2.59200  | -0.08200 |
| H | 1.43700 | -3.50600 | -0.40000 |
| H | 3.05500 | -4.24600 | -1.39100 |
| H | 1.25400 | 0.54700  | -3.25900 |
| H | 1.96900 | -1.25500 | -5.23400 |
| H | 2.76800 | -3.48300 | -3.77600 |
| H | 5.04600 | -4.00600 | 0.13100  |
| H | 6.10100 | -2.27400 | 2.03100  |

|    |          |          |          |
|----|----------|----------|----------|
| H  | 4.19600  | -0.26300 | 2.15900  |
| B  | 2.50600  | -3.24600 | -0.94300 |
| C  | 1.61400  | -0.47500 | -3.15700 |
| C  | 1.98700  | -1.39100 | -4.15400 |
| C  | 2.39400  | -2.51800 | -3.43900 |
| C  | 4.65500  | -3.06900 | 0.52400  |
| C  | 5.16700  | -2.18900 | 1.47900  |
| C  | 4.20700  | -1.17000 | 1.55600  |
| N  | 1.77800  | -1.01400 | -1.94100 |
| N  | 3.19100  | -1.42700 | 0.71600  |
| N  | 2.25700  | -2.26500 | -2.12300 |
| N  | 3.47600  | -2.59100 | 0.08400  |
| Fe | 1.74800  | -0.00000 | -0.00000 |
| H  | 1.01200  | 2.57800  | -1.70600 |
| H  | -1.04800 | 3.79300  | -2.52100 |
| H  | -3.28400 | 2.89500  | -1.92100 |
| H  | -3.28400 | -2.89600 | 1.92000  |
| H  | -1.04800 | -3.79400 | 2.51900  |
| H  | 1.01200  | -2.57900 | 1.70300  |
| C  | 0.00800  | 2.22000  | -1.47000 |
| C  | -1.14200 | 2.88700  | -1.91800 |
| C  | -2.38600 | 2.37900  | -1.57800 |
| C  | -2.48600 | 1.20700  | -0.79800 |
| C  | -1.26900 | 0.61100  | -0.40200 |
| C  | -3.76200 | 0.60200  | -0.39700 |
| C  | 0.00800  | -2.22100 | 1.46800  |
| C  | -1.14200 | -2.88800 | 1.91700  |
| C  | -2.38600 | -2.38000 | 1.57600  |
| C  | -2.48600 | -1.20800 | 0.79600  |
| C  | -1.26900 | -0.61200 | 0.40000  |
| C  | -3.76200 | -0.60300 | 0.39600  |
| N  | -0.06700 | 1.11900  | -0.73500 |
| N  | -0.06700 | -1.12000 | 0.73300  |
| C  | -4.98200 | -1.16400 | 0.76500  |
| H  | -5.00800 | -2.07500 | 1.36400  |
| C  | -4.98200 | 1.16300  | -0.76600 |
| H  | -5.00800 | 2.07500  | -1.36500 |
| C  | -6.21900 | -0.60000 | 0.39400  |
| C  | -6.21900 | 0.59900  | -0.39400 |
| C  | -8.65400 | 0.59400  | -0.39100 |
| H  | -9.60500 | 1.04500  | -0.68600 |
| C  | -8.65300 | -0.59500 | 0.39100  |
| H  | -9.60500 | -1.04500 | 0.68700  |
| C  | -7.46600 | 1.17600  | -0.77300 |
| C  | -7.46600 | -1.17700 | 0.77300  |
| H  | -7.46300 | 2.09100  | -1.37400 |
| H  | -7.46300 | -2.09100 | 1.37400  |

16) Reduced HS configuration for  $N_c = 5$ , Charge = -1,  $S = 3/2$

|   |         |          |          |
|---|---------|----------|----------|
| H | 1.71000 | 3.58500  | -0.37400 |
| H | 3.39600 | 4.33700  | 0.50200  |
| H | 1.01900 | 0.27700  | 3.24600  |
| H | 1.86100 | 2.39400  | 4.83400  |
| H | 2.94700 | 4.15600  | 2.97600  |
| H | 5.37300 | 3.56300  | -0.82700 |
| H | 6.24200 | 1.38700  | -2.32600 |
| H | 4.10000 | -0.36800 | -2.15500 |

|    |          |          |          |
|----|----------|----------|----------|
| B  | 2.73600  | 3.33100  | 0.24800  |
| C  | 1.50100  | 1.20900  | 2.95600  |
| C  | 1.93600  | 2.28300  | 3.75300  |
| C  | 2.48800  | 3.17900  | 2.83700  |
| C  | 4.87700  | 2.62200  | -1.05700 |
| C  | 5.29300  | 1.52200  | -1.80900 |
| C  | 4.21000  | 0.63100  | -1.73600 |
| N  | 1.76900  | 1.44700  | 1.66700  |
| N  | 3.22100  | 1.16000  | -1.00500 |
| N  | 2.37000  | 2.65300  | 1.60000  |
| N  | 3.63700  | 2.37700  | -0.58900 |
| H  | 1.71100  | -3.58600 | 0.37400  |
| H  | 3.39800  | -4.33700 | -0.50200 |
| H  | 1.01900  | -0.27700 | -3.24600 |
| H  | 1.86100  | -2.39400 | -4.83300 |
| H  | 2.94900  | -4.15600 | -2.97600 |
| H  | 5.37400  | -3.56200 | 0.82700  |
| H  | 6.24200  | -1.38600 | 2.32600  |
| H  | 4.10000  | 0.36900  | 2.15500  |
| B  | 2.73700  | -3.33100 | -0.24800 |
| C  | 1.50100  | -1.20900 | -2.95600 |
| C  | 1.93700  | -2.28300 | -3.75300 |
| C  | 2.48900  | -3.17900 | -2.83700 |
| C  | 4.87800  | -2.62100 | 1.05800  |
| C  | 5.29300  | -1.52200 | 1.80900  |
| C  | 4.21100  | -0.63000 | 1.73600  |
| N  | 1.76900  | -1.44800 | -1.66700 |
| N  | 3.22100  | -1.16000 | 1.00500  |
| N  | 2.37100  | -2.65300 | -1.60000 |
| N  | 3.63700  | -2.37700 | 0.59000  |
| Fe | 1.62600  | -0.00000 | 0.00000  |
| H  | 0.95900  | 2.18800  | -2.20100 |
| H  | -1.09700 | 3.19300  | -3.25500 |
| H  | -3.34400 | 2.41900  | -2.47900 |
| H  | -3.34400 | -2.41900 | 2.47800  |
| H  | -1.09700 | -3.19300 | 3.25500  |
| H  | 0.95900  | -2.18800 | 2.20100  |
| C  | -0.04300 | 1.87200  | -1.89600 |
| C  | -1.18800 | 2.42900  | -2.48000 |
| C  | -2.44400 | 1.98800  | -2.03400 |
| C  | -2.54700 | 1.01600  | -1.03600 |
| C  | -1.31800 | 0.49600  | -0.50200 |
| C  | -3.82200 | 0.50700  | -0.51700 |
| C  | -0.04300 | -1.87300 | 1.89600  |
| C  | -1.18800 | -2.42900 | 2.48000  |
| C  | -2.44400 | -1.98800 | 2.03300  |
| C  | -2.54700 | -1.01700 | 1.03600  |
| C  | -1.31800 | -0.49700 | 0.50200  |
| C  | -3.82200 | -0.50800 | 0.51700  |
| N  | -0.09300 | 0.94500  | -0.95100 |
| N  | -0.09300 | -0.94600 | 0.95100  |
| C  | -5.04900 | -0.97400 | 0.99100  |
| H  | -5.07300 | -1.74000 | 1.76900  |
| C  | -5.04900 | 0.97400  | -0.99100 |
| H  | -5.07300 | 1.74000  | -1.76900 |
| C  | -6.29200 | -0.50300 | 0.51200  |
| C  | -6.29200 | 0.50300  | -0.51200 |
| C  | -8.73500 | 0.49700  | -0.50500 |

|   |          |          |          |
|---|----------|----------|----------|
| H | -9.68600 | 0.87800  | -0.89200 |
| C | -8.73500 | -0.49700 | 0.50500  |
| H | -9.68600 | -0.87800 | 0.89200  |
| C | -7.53900 | 0.98400  | -1.00000 |
| C | -7.53900 | -0.98400 | 1.00000  |
| H | -7.53400 | 1.75200  | -1.78100 |
| H | -7.53400 | -1.75200 | 1.78100  |

17) Neutral LS configuration for  $N_c = 6$ , Charge = 0,  $S = 0$

|    |          |          |          |
|----|----------|----------|----------|
| H  | 2.30300  | -3.49500 | -0.98400 |
| H  | 4.00600  | -3.75400 | -2.04900 |
| H  | 1.67200  | 1.08400  | -2.93500 |
| H  | 2.26300  | -0.33100 | -5.21900 |
| H  | 3.32600  | -2.70300 | -4.22700 |
| H  | 5.76600  | -3.81100 | -0.24800 |
| H  | 6.67400  | -2.27700 | 1.88500  |
| H  | 4.76600  | -0.28700 | 2.07500  |
| B  | 3.32200  | -2.96100 | -1.41400 |
| C  | 2.08700  | 0.08400  | -3.02300 |
| C  | 2.40100  | -0.63700 | -4.18400 |
| C  | 2.94200  | -1.82800 | -3.70600 |
| C  | 5.34100  | -2.92200 | 0.21400  |
| C  | 5.77800  | -2.14200 | 1.28200  |
| C  | 4.81000  | -1.13300 | 1.39300  |
| N  | 2.40900  | -0.62500 | -1.92900 |
| N  | 3.85500  | -1.30600 | 0.46700  |
| N  | 2.93300  | -1.79400 | -2.35800 |
| N  | 4.18900  | -2.40000 | -0.25600 |
| H  | 2.30300  | 3.49500  | 0.98400  |
| H  | 4.00600  | 3.75400  | 2.05000  |
| H  | 1.67200  | -1.08400 | 2.93500  |
| H  | 2.26300  | 0.33100  | 5.21900  |
| H  | 3.32600  | 2.70300  | 4.22700  |
| H  | 5.76600  | 3.81100  | 0.24800  |
| H  | 6.67400  | 2.27700  | -1.88500 |
| H  | 4.76600  | 0.28700  | -2.07400 |
| B  | 3.32200  | 2.96100  | 1.41400  |
| C  | 2.08700  | -0.08400 | 3.02300  |
| C  | 2.40100  | 0.63700  | 4.18400  |
| C  | 2.94200  | 1.82800  | 3.70600  |
| C  | 5.34100  | 2.92200  | -0.21400 |
| C  | 5.77800  | 2.14200  | -1.28200 |
| C  | 4.81000  | 1.13300  | -1.39300 |
| N  | 2.40900  | 0.62500  | 1.92900  |
| N  | 3.85500  | 1.30600  | -0.46700 |
| N  | 2.93200  | 1.79400  | 2.35800  |
| N  | 4.18900  | 2.40000  | 0.25700  |
| Fe | 2.40000  | 0.00000  | 0.00000  |
| H  | 1.98000  | -2.83600 | 1.14300  |
| H  | -0.05100 | -4.21100 | 1.67300  |
| H  | -2.31000 | -3.25000 | 1.27200  |
| H  | -2.31000 | 3.25000  | -1.27200 |
| H  | -0.05100 | 4.21100  | -1.67300 |
| H  | 1.98000  | 2.83600  | -1.14300 |
| C  | 0.97700  | -2.45200 | 0.96300  |
| C  | -0.16400 | -3.20400 | 1.26600  |
| C  | -1.42100 | -2.66100 | 1.04000  |

|   |           |          |          |
|---|-----------|----------|----------|
| C | -1.53600  | -1.35500 | 0.52200  |
| C | -0.33000  | -0.67800 | 0.25400  |
| C | -2.81400  | -0.67800 | 0.26200  |
| C | 0.97700   | 2.45200  | -0.96300 |
| C | -0.16400  | 3.20400  | -1.26600 |
| C | -1.42100  | 2.66100  | -1.04000 |
| C | -1.53600  | 1.35500  | -0.52200 |
| C | -0.33000  | 0.67800  | -0.25400 |
| C | -2.81400  | 0.67800  | -0.26200 |
| N | 0.89500   | -1.22200 | 0.45700  |
| N | 0.89500   | 1.22200  | -0.45700 |
| C | -4.02500  | 1.30300  | -0.50200 |
| H | -4.05000  | 2.32100  | -0.89400 |
| C | -4.02500  | -1.30300 | 0.50200  |
| H | -4.05000  | -2.32100 | 0.89400  |
| C | -5.27300  | -0.67400 | 0.25900  |
| C | -5.27300  | 0.67400  | -0.26000 |
| C | -7.72200  | -0.67600 | 0.26000  |
| H | -6.49900  | 2.33500  | -0.89900 |
| C | -7.72200  | 0.67600  | -0.26000 |
| C | -6.50000  | 1.31400  | -0.50600 |
| C | -6.50000  | -1.31400 | 0.50600  |
| H | -6.49900  | -2.33500 | 0.89900  |
| C | -8.97900  | 1.31600  | -0.50700 |
| C | -8.97900  | -1.31600 | 0.50700  |
| C | -10.16100 | 0.66700  | -0.25600 |
| H | -11.11400 | 1.16800  | -0.44900 |
| C | -10.16100 | -0.66700 | 0.25700  |
| H | -11.11400 | -1.16800 | 0.45000  |
| H | -8.97700  | 2.33700  | -0.90000 |
| H | -8.97700  | -2.33700 | 0.89900  |

18) Reduced LS configuration for  $N_c = 6$ , Charge =  $-1$ ,  $S = 1/2$

|   |         |          |          |
|---|---------|----------|----------|
| H | 2.49900 | -3.60100 | -0.82700 |
| H | 4.22100 | -3.75900 | -1.89000 |
| H | 1.48900 | 0.82900  | -2.94600 |
| H | 2.11100 | -0.67200 | -5.17500 |
| H | 3.38600 | -2.89500 | -4.09000 |
| H | 5.92700 | -3.68800 | -0.05200 |
| H | 6.69600 | -2.07900 | 2.08400  |
| H | 4.69000 | -0.17900 | 2.17800  |
| B | 3.47100 | -3.00200 | -1.27700 |
| C | 1.98400 | -0.13600 | -3.00000 |
| C | 2.31300 | -0.90100 | -4.13000 |
| C | 2.95900 | -2.01800 | -3.60800 |
| C | 5.45000 | -2.81100 | 0.38100  |
| C | 5.81500 | -1.99600 | 1.45100  |
| C | 4.79500 | -1.03200 | 1.51300  |
| N | 2.40000 | -0.75100 | -1.88300 |
| N | 3.88200 | -1.26200 | 0.55800  |
| N | 2.99400 | -1.90300 | -2.26300 |
| N | 4.29100 | -2.34900 | -0.13400 |
| H | 2.49900 | 3.60100  | 0.82700  |
| H | 4.22000 | 3.75900  | 1.89000  |
| H | 1.48900 | -0.82900 | 2.94600  |
| H | 2.11100 | 0.67200  | 5.17500  |
| H | 3.38600 | 2.89500  | 4.09000  |

|    |           |          |          |
|----|-----------|----------|----------|
| H  | 5.92700   | 3.68800  | 0.05200  |
| H  | 6.69600   | 2.07900  | -2.08400 |
| H  | 4.69000   | 0.17900  | -2.17800 |
| B  | 3.47100   | 3.00200  | 1.27700  |
| C  | 1.98400   | 0.13600  | 3.00000  |
| C  | 2.31300   | 0.90100  | 4.13000  |
| C  | 2.95900   | 2.01800  | 3.60800  |
| C  | 5.45000   | 2.81100  | -0.38100 |
| C  | 5.81500   | 1.99600  | -1.45000 |
| C  | 4.79500   | 1.03200  | -1.51300 |
| N  | 2.40000   | 0.75100  | 1.88300  |
| N  | 3.88200   | 1.26200  | -0.55800 |
| N  | 2.99400   | 1.90300  | 2.26300  |
| N  | 4.29100   | 2.34900  | 0.13400  |
| Fe | 2.40400   | 0.00000  | 0.00000  |
| H  | 1.97200   | -2.80200 | 1.25300  |
| H  | -0.07600  | -4.14200 | 1.83900  |
| H  | -2.32600  | -3.17800 | 1.40200  |
| H  | -2.32600  | 3.17800  | -1.40200 |
| H  | -0.07600  | 4.14200  | -1.83900 |
| H  | 1.97200   | 2.80200  | -1.25300 |
| C  | 0.97200   | -2.41300 | 1.06300  |
| C  | -0.18100  | -3.14900 | 1.39500  |
| C  | -1.43200  | -2.60500 | 1.14700  |
| C  | -1.55500  | -1.31900 | 0.57400  |
| C  | -0.32700  | -0.65600 | 0.28000  |
| C  | -2.82400  | -0.66500 | 0.29000  |
| C  | 0.97200   | 2.41300  | -1.06300 |
| C  | -0.18200  | 3.14900  | -1.39500 |
| C  | -1.43200  | 2.60500  | -1.14700 |
| C  | -1.55500  | 1.31900  | -0.57400 |
| C  | -0.32700  | 0.65600  | -0.28000 |
| C  | -2.82400  | 0.66500  | -0.29000 |
| N  | 0.89700   | -1.20700 | 0.51600  |
| N  | 0.89700   | 1.20700  | -0.51600 |
| C  | -4.05200  | 1.27800  | -0.55800 |
| H  | -4.07700  | 2.28000  | -0.99300 |
| C  | -4.05200  | -1.27800 | 0.55800  |
| H  | -4.07700  | -2.28000 | 0.99300  |
| C  | -5.30400  | -0.66500 | 0.29100  |
| C  | -5.30400  | 0.66500  | -0.29100 |
| C  | -7.77200  | -0.66300 | 0.29000  |
| H  | -6.53300  | 2.29100  | -1.00100 |
| C  | -7.77200  | 0.66300  | -0.29000 |
| C  | -6.53300  | 1.28700  | -0.56200 |
| C  | -6.53300  | -1.28700 | 0.56200  |
| H  | -6.53300  | -2.29100 | 1.00100  |
| C  | -9.02300  | 1.28400  | -0.56100 |
| C  | -9.02300  | -1.28400 | 0.56100  |
| C  | -10.22300 | 0.64800  | -0.28300 |
| H  | -11.17200 | 1.14800  | -0.50200 |
| C  | -10.22300 | -0.64800 | 0.28300  |
| H  | -11.17200 | -1.14800 | 0.50200  |
| H  | -9.02000  | 2.28800  | -1.00000 |
| H  | -9.02000  | -2.28800 | 1.00000  |

19) Neutral HS configuration for  $N_c = 6$ , Charge = 0,  $S = 2$



|    |          |          |          |
|----|----------|----------|----------|
| H  | 2.23100  | 3.45400  | 0.74100  |
| H  | 3.85000  | 4.08600  | 1.80300  |
| H  | 2.03200  | -0.86200 | 3.18800  |
| H  | 2.74400  | 0.73800  | 5.33100  |
| H  | 3.55200  | 3.09600  | 4.10100  |
| H  | 5.84300  | 3.99000  | 0.26700  |
| H  | 6.89500  | 2.45200  | -1.79400 |
| H  | 4.98200  | 0.47000  | -2.12200 |
| B  | 3.29900  | 3.13800  | 1.25700  |
| C  | 2.39500  | 0.16500  | 3.18800  |
| C  | 2.76600  | 0.97800  | 4.27000  |
| C  | 3.17700  | 2.16900  | 3.67000  |
| C  | 5.44900  | 3.09900  | -0.21700 |
| C  | 5.95900  | 2.31600  | -1.25400 |
| C  | 4.99500  | 1.31300  | -1.43200 |
| N  | 2.56400  | 0.82000  | 2.03000  |
| N  | 3.98000  | 1.48900  | -0.57200 |
| N  | 3.04400  | 2.04600  | 2.33500  |
| N  | 4.26800  | 2.58300  | 0.17300  |
| H  | 2.22800  | -3.45300 | -0.74000 |
| H  | 3.84500  | -4.08700 | -1.80300 |
| H  | 2.03100  | 0.86200  | -3.18800 |
| H  | 2.74000  | -0.73800 | -5.33100 |
| H  | 3.54600  | -3.09600 | -4.10100 |
| H  | 5.84100  | -3.99200 | -0.27100 |
| H  | 6.89600  | -2.45400 | 1.78800  |
| H  | 4.98500  | -0.47100 | 2.11900  |
| B  | 3.29500  | -3.13800 | -1.25700 |
| C  | 2.39200  | -0.16500 | -3.18800 |
| C  | 2.76200  | -0.97800 | -4.27000 |
| C  | 3.17300  | -2.16900 | -3.67000 |
| C  | 5.44800  | -3.10000 | 0.21400  |
| C  | 5.96000  | -2.31700 | 1.25000  |
| C  | 4.99700  | -1.31400 | 1.42900  |
| N  | 2.56100  | -0.82000 | -2.03000 |
| N  | 3.98000  | -1.49000 | 0.57100  |
| N  | 3.04000  | -2.04600 | -2.33500 |
| N  | 4.26600  | -2.58400 | -0.17400 |
| Fe | 2.53500  | -0.00000 | 0.00000  |
| H  | 1.80200  | 2.73300  | -1.44000 |
| H  | -0.25600 | 4.02600  | -2.13100 |
| H  | -2.49300 | 3.07400  | -1.62400 |
| H  | -2.49300 | -3.07300 | 1.62600  |
| H  | -0.25600 | -4.02400 | 2.13400  |
| H  | 1.80200  | -2.73200 | 1.44300  |
| C  | 0.79700  | 2.35500  | -1.24100 |
| C  | -0.35100 | 3.06400  | -1.62200 |
| C  | -1.59600 | 2.52600  | -1.33300 |
| C  | -1.69900 | 1.28300  | -0.67300 |
| C  | -0.48300 | 0.64900  | -0.33800 |
| C  | -2.97700 | 0.64300  | -0.33600 |
| C  | 0.79700  | -2.35400 | 1.24300  |
| C  | -0.35100 | -3.06300 | 1.62400  |
| C  | -1.59600 | -2.52500 | 1.33500  |
| C  | -1.69900 | -1.28200 | 0.67500  |
| C  | -0.48300 | -0.64800 | 0.34000  |
| C  | -2.97700 | -0.64200 | 0.33800  |
| N  | 0.72000  | 1.18600  | -0.61800 |

|   |           |          |          |
|---|-----------|----------|----------|
| N | 0.72000   | -1.18500 | 0.62000  |
| C | -4.18900  | -1.23600 | 0.64700  |
| H | -4.21600  | -2.20400 | 1.15200  |
| C | -4.18900  | 1.23700  | -0.64600 |
| H | -4.21600  | 2.20400  | -1.15100 |
| C | -5.43800  | -0.64000 | 0.33400  |
| C | -5.43800  | 0.64000  | -0.33400 |
| C | -7.88600  | 0.64300  | -0.33500 |
| C | -7.88600  | -0.64200 | 0.33500  |
| C | -6.66400  | 1.24800  | -0.65100 |
| C | -6.66400  | -1.24800 | 0.65100  |
| H | -6.66300  | 2.21800  | -1.15700 |
| H | -6.66300  | -2.21800 | 1.15800  |
| C | -9.14300  | -1.25000 | 0.65200  |
| C | -9.14300  | 1.25000  | -0.65200 |
| C | -10.32500 | -0.63400 | 0.33000  |
| H | -11.27800 | -1.11000 | 0.57800  |
| C | -10.32500 | 0.63300  | -0.33100 |
| H | -11.27800 | 1.10900  | -0.57900 |
| H | -9.14100  | -2.22100 | 1.15800  |
| H | -9.14100  | 2.22100  | -1.15800 |

20) Reduced HS configuration for  $N_c = 6$ , Charge = -1,  $S = 3/2$

|   |         |          |          |
|---|---------|----------|----------|
| H | 2.48600 | 3.58000  | 0.36500  |
| H | 4.16600 | 4.14500  | 1.37900  |
| H | 1.81400 | -0.40700 | 3.23100  |
| H | 2.66200 | 1.33600  | 5.21500  |
| H | 3.73600 | 3.44700  | 3.75800  |
| H | 6.13700 | 3.69200  | -0.10300 |
| H | 7.01500 | 1.88300  | -2.02400 |
| H | 4.89900 | 0.09800  | -2.19800 |
| B | 3.51400 | 3.21000  | 0.92200  |
| C | 2.29200 | 0.56700  | 3.13600  |
| C | 2.73100 | 1.45200  | 4.13400  |
| C | 3.27700 | 2.52000  | 3.42200  |
| C | 5.65100 | 2.81000  | -0.51600 |
| C | 6.07200 | 1.89400  | -1.48100 |
| C | 5.00300 | 0.99000  | -1.58300 |
| N | 2.55100 | 1.06900  | 1.92200  |
| N | 4.01500 | 1.34500  | -0.74900 |
| N | 3.15200 | 2.26400  | 2.10300  |
| N | 4.42000 | 2.45700  | -0.09600 |
| H | 2.47900 | -3.57900 | -0.36700 |
| H | 4.15700 | -4.14700 | -1.38200 |
| H | 1.81100 | 0.41000  | -3.22900 |
| H | 2.65400 | -1.33300 | -5.21500 |
| H | 3.72700 | -3.44700 | -3.76000 |
| H | 6.13000 | -3.69900 | 0.10000  |
| H | 7.01300 | -1.89200 | 2.02000  |
| H | 4.90100 | -0.10200 | 2.19600  |
| B | 3.50700 | -3.21100 | -0.92400 |
| C | 2.28700 | -0.56500 | -3.13500 |
| C | 2.72400 | -1.45000 | -4.13500 |
| C | 3.26900 | -2.51900 | -3.42300 |
| C | 5.64600 | -2.81600 | 0.51300  |
| C | 6.06900 | -1.90100 | 1.47800  |
| C | 5.00200 | -0.99500 | 1.58100  |

|    |           |          |          |
|----|-----------|----------|----------|
| N  | 2.54600   | -1.06700 | -1.92200 |
| N  | 4.01300   | -1.34700 | 0.74700  |
| N  | 3.14600   | -2.26300 | -2.10500 |
| N  | 4.41500   | -2.46000 | 0.09300  |
| Fe | 2.45800   | 0.00100  | 0.00000  |
| H  | 1.76500   | 2.59800  | -1.69400 |
| H  | -0.30900  | 3.80500  | -2.50400 |
| H  | -2.53800  | 2.88800  | -1.90500 |
| H  | -2.53800  | -2.88700 | 1.90700  |
| H  | -0.30900  | -3.80300 | 2.50700  |
| H  | 1.76500   | -2.59600 | 1.69800  |
| C  | 0.76300   | 2.22900  | -1.46200 |
| C  | -0.39600  | 2.89400  | -1.90600 |
| C  | -1.63600  | 2.37700  | -1.56600 |
| C  | -1.74500  | 1.20100  | -0.78700 |
| C  | -0.50900  | 0.60200  | -0.39200 |
| C  | -3.01600  | 0.60600  | -0.39700 |
| C  | 0.76300   | -2.22700 | 1.46500  |
| C  | -0.39600  | -2.89200 | 1.90900  |
| C  | -1.63600  | -2.37500 | 1.56800  |
| C  | -1.74500  | -1.19900 | 0.79000  |
| C  | -0.50900  | -0.60000 | 0.39500  |
| C  | -3.01600  | -0.60500 | 0.39800  |
| N  | 0.69600   | 1.12600  | -0.73500 |
| N  | 0.69600   | -1.12400 | 0.73800  |
| C  | -4.24400  | -1.16600 | 0.76400  |
| H  | -4.27100  | -2.08000 | 1.36200  |
| C  | -4.24400  | 1.16700  | -0.76300 |
| H  | -4.27100  | 2.08100  | -1.36100 |
| C  | -5.49600  | -0.60700 | 0.39800  |
| C  | -5.49600  | 0.60800  | -0.39700 |
| C  | -7.96400  | 0.60500  | -0.39600 |
| C  | -7.96400  | -0.60500 | 0.39600  |
| C  | -6.72500  | 1.17500  | -0.76800 |
| C  | -6.72500  | -1.17500 | 0.76900  |
| H  | -6.72500  | 2.09300  | -1.36800 |
| H  | -6.72500  | -2.09200 | 1.36800  |
| C  | -9.21400  | -1.17300 | 0.76600  |
| C  | -9.21400  | 1.17300  | -0.76700 |
| C  | -10.41400 | -0.59200 | 0.38700  |
| H  | -11.36400 | -1.04900 | 0.68500  |
| C  | -10.41400 | 0.59200  | -0.38700 |
| H  | -11.36400 | 1.04900  | -0.68600 |
| H  | -9.21100  | -2.09000 | 1.36600  |
| H  | -9.21100  | 2.09000  | -1.36600 |

21) Neutral LS configuration for  $N_c = 7$ , Charge = 0,  $S = 0$

|   |         |          |          |
|---|---------|----------|----------|
| H | 3.15100 | -3.43600 | -1.18300 |
| H | 4.85500 | -3.62600 | -2.26100 |
| H | 2.49600 | 1.24300  | -2.86700 |
| H | 3.09000 | -0.03800 | -5.22800 |
| H | 4.16700 | -2.45700 | -4.37400 |
| H | 6.61100 | -3.78400 | -0.46200 |
| H | 7.51000 | -2.37700 | 1.76100  |
| H | 5.59700 | -0.40600 | 2.06200  |
| B | 4.16800 | -2.87400 | -1.58000 |
| C | 2.91600 | 0.25200  | -3.01200 |

|    |          |          |          |
|----|----------|----------|----------|
| C  | 3.23200  | -0.40100 | -4.21200 |
| C  | 3.78000  | -1.61400 | -3.80400 |
| C  | 6.18300  | -2.92400 | 0.05100  |
| C  | 6.61500  | -2.20900 | 1.16500  |
| C  | 5.64400  | -1.21000 | 1.33200  |
| N  | 3.24500  | -0.51600 | -1.96100 |
| N  | 4.69200  | -1.32900 | 0.39400  |
| N  | 3.77300  | -1.65600 | -2.45600 |
| N  | 5.03100  | -2.37800 | -0.39200 |
| H  | 3.15100  | 3.43600  | 1.18300  |
| H  | 4.85500  | 3.62600  | 2.26100  |
| H  | 2.49600  | -1.24300 | 2.86700  |
| H  | 3.09000  | 0.03800  | 5.22800  |
| H  | 4.16700  | 2.45700  | 4.37400  |
| H  | 6.61100  | 3.78400  | 0.46200  |
| H  | 7.51000  | 2.37700  | -1.76100 |
| H  | 5.59700  | 0.40600  | -2.06200 |
| B  | 4.16800  | 2.87400  | 1.58000  |
| C  | 2.91600  | -0.25200 | 3.01200  |
| C  | 3.23200  | 0.40100  | 4.21200  |
| C  | 3.78000  | 1.61400  | 3.80400  |
| C  | 6.18300  | 2.92400  | -0.05100 |
| C  | 6.61500  | 2.20900  | -1.16500 |
| C  | 5.64400  | 1.21000  | -1.33200 |
| N  | 3.24500  | 0.51600  | 1.96100  |
| N  | 4.69200  | 1.32900  | -0.39400 |
| N  | 3.77300  | 1.65600  | 2.45600  |
| N  | 5.03100  | 2.37800  | 0.39200  |
| Fe | 3.23700  | 0.00000  | 0.00000  |
| H  | 2.81900  | -2.89700 | 0.97500  |
| H  | 0.78800  | -4.30300 | 1.42100  |
| H  | -1.47100 | -3.32100 | 1.07700  |
| H  | -1.47100 | 3.32100  | -1.07700 |
| H  | 0.78800  | 4.30300  | -1.42100 |
| H  | 2.81900  | 2.89700  | -0.97500 |
| C  | 1.81600  | -2.50500 | 0.81800  |
| C  | 0.67500  | -3.27400 | 1.07400  |
| C  | -0.58300 | -2.71900 | 0.88000  |
| C  | -0.69800 | -1.38500 | 0.44100  |
| C  | 0.50700  | -0.69200 | 0.21400  |
| C  | -1.97700 | -0.69500 | 0.22100  |
| C  | 1.81600  | 2.50500  | -0.81800 |
| C  | 0.67500  | 3.27400  | -1.07400 |
| C  | -0.58300 | 2.71900  | -0.88000 |
| C  | -0.69800 | 1.38500  | -0.44100 |
| C  | 0.50700  | 0.69200  | -0.21400 |
| C  | -1.97700 | 0.69500  | -0.22100 |
| N  | 1.73200  | -1.24600 | 0.38500  |
| N  | 1.73200  | 1.24600  | -0.38500 |
| C  | -3.18600 | 1.33300  | -0.42200 |
| H  | -3.21000 | 2.37300  | -0.75000 |
| C  | -3.18600 | -1.33300 | 0.42200  |
| H  | -3.21000 | -2.37300 | 0.75000  |
| C  | -4.43900 | -0.69100 | 0.21800  |
| C  | -4.43900 | 0.69100  | -0.21800 |
| C  | -6.89000 | -0.69400 | 0.21800  |
| H  | -5.65600 | 2.38900  | -0.75200 |
| C  | -6.89000 | 0.69400  | -0.21800 |

|   |           |          |          |
|---|-----------|----------|----------|
| C | -5.65700  | 1.34500  | -0.42300 |
| C | -5.65700  | -1.34500 | 0.42300  |
| H | -5.65600  | -2.38900 | 0.75200  |
| C | -8.12700  | 1.34400  | -0.42200 |
| C | -8.12700  | -1.34400 | 0.42200  |
| C | -9.34300  | 0.69300  | -0.21800 |
| C | -9.34300  | -0.69300 | 0.21800  |
| H | -8.12800  | 2.38800  | -0.75100 |
| H | -8.12800  | -2.38800 | 0.75100  |
| C | -10.60400 | -1.34700 | 0.42300  |
| H | -10.60200 | -2.39100 | 0.75100  |
| C | -10.60400 | 1.34700  | -0.42300 |
| H | -10.60200 | 2.39100  | -0.75100 |
| C | -11.78400 | -0.68300 | 0.21500  |
| H | -12.73800 | -1.19400 | 0.37500  |
| C | -11.78400 | 0.68300  | -0.21500 |
| H | -12.73800 | 1.19400  | -0.37500 |

22) Reduced LS configuration for  $N_c = 7$ , Charge = -1,  $S = 1/2$

|   |         |          |          |
|---|---------|----------|----------|
| H | 3.32100 | 3.52300  | 1.09200  |
| H | 5.04100 | 3.61500  | 2.16400  |
| H | 2.34400 | -1.05800 | 2.87900  |
| H | 2.96400 | 0.27300  | 5.21200  |
| H | 4.22200 | 2.58000  | 4.29500  |
| H | 6.75400 | 3.68300  | 0.33000  |
| H | 7.53400 | 2.23500  | -1.91400 |
| H | 5.53600 | 0.34000  | -2.15100 |
| B | 4.29800 | 2.90000  | 1.49700  |
| C | 2.83200 | -0.09600 | 3.00400  |
| C | 3.16100 | 0.58300  | 4.18800  |
| C | 3.79800 | 1.74000  | 3.74900  |
| C | 6.28100 | 2.83800  | -0.16700 |
| C | 6.65200 | 2.10400  | -1.29000 |
| C | 5.63600 | 1.14400  | -1.42600 |
| N | 3.24000 | 0.60400  | 1.93500  |
| N | 4.71900 | 1.30100  | -0.46000 |
| N | 3.82800 | 1.72800  | 2.40000  |
| N | 5.12200 | 2.33700  | 0.31000  |
| H | 3.32100 | -3.52300 | -1.09200 |
| H | 5.04100 | -3.61500 | -2.16400 |
| H | 2.34400 | 1.05800  | -2.87900 |
| H | 2.96400 | -0.27300 | -5.21200 |
| H | 4.22200 | -2.58000 | -4.29500 |
| H | 6.75400 | -3.68300 | -0.33000 |
| H | 7.53400 | -2.23500 | 1.91400  |
| H | 5.53600 | -0.34000 | 2.15100  |
| B | 4.29800 | -2.90000 | -1.49700 |
| C | 2.83200 | 0.09600  | -3.00400 |
| C | 3.16100 | -0.58300 | -4.18800 |
| C | 3.79800 | -1.74000 | -3.74900 |
| C | 6.28100 | -2.83800 | 0.16700  |
| C | 6.65200 | -2.10400 | 1.29000  |
| C | 5.63600 | -1.14400 | 1.42600  |
| N | 3.24000 | -0.60400 | -1.93500 |
| N | 4.71900 | -1.30100 | 0.46000  |
| N | 3.82800 | -1.72800 | -2.40000 |
| N | 5.12200 | -2.33700 | -0.31000 |

|    |           |          |          |
|----|-----------|----------|----------|
| Fe | 3.24300   | -0.00000 | 0.00000  |
| H  | 2.81600   | 2.88400  | -1.04000 |
| H  | 0.77100   | 4.26800  | -1.52200 |
| H  | -1.48100  | 3.27900  | -1.15800 |
| H  | -1.48100  | -3.27900 | 1.15800  |
| H  | 0.77100   | -4.26800 | 1.52200  |
| H  | 2.81600   | -2.88400 | 1.04000  |
| C  | 1.81400   | 2.48600  | -0.88000 |
| C  | 0.66400   | 3.24400  | -1.15300 |
| C  | -0.58900  | 2.68800  | -0.94700 |
| C  | -0.71100  | 1.36000  | -0.47300 |
| C  | 0.51200   | 0.68000  | -0.23100 |
| C  | -1.97900  | 0.68500  | -0.23800 |
| C  | 1.81400   | -2.48600 | 0.88000  |
| C  | 0.66400   | -3.24400 | 1.15300  |
| C  | -0.58900  | -2.68800 | 0.94700  |
| C  | -0.71100  | -1.36000 | 0.47300  |
| C  | 0.51200   | -0.68000 | 0.23100  |
| C  | -1.97900  | -0.68500 | 0.23800  |
| N  | 1.73500   | 1.24000  | -0.42300 |
| N  | 1.73500   | -1.24000 | 0.42300  |
| C  | -3.20600  | -1.31700 | 0.45800  |
| H  | -3.23000  | -2.34900 | 0.81500  |
| C  | -3.20600  | 1.31700  | -0.45800 |
| H  | -3.23000  | 2.34900  | -0.81500 |
| C  | -4.45600  | 0.68800  | -0.23900 |
| C  | -4.45600  | -0.68800 | 0.23900  |
| C  | -6.92700  | 0.69000  | -0.23900 |
| H  | -5.68200  | -2.36400 | 0.82000  |
| C  | -6.92700  | -0.69000 | 0.23900  |
| C  | -5.68200  | -1.32900 | 0.46100  |
| C  | -5.68200  | 1.32900  | -0.46100 |
| H  | -5.68200  | 2.36400  | -0.82000 |
| C  | -8.16000  | -1.32600 | 0.46000  |
| C  | -8.16000  | 1.32600  | -0.46000 |
| C  | -9.39400  | -0.68400 | 0.23700  |
| C  | -9.39400  | 0.68400  | -0.23700 |
| H  | -8.16100  | -2.36200 | 0.81800  |
| H  | -8.16100  | 2.36200  | -0.81800 |
| C  | -10.64800 | 1.32500  | -0.45900 |
| H  | -10.64500 | 2.36100  | -0.81800 |
| C  | -10.64800 | -1.32500 | 0.45900  |
| H  | -10.64500 | -2.36100 | 0.81800  |
| C  | -11.84300 | 0.67100  | -0.23200 |
| H  | -12.79300 | 1.18500  | -0.41000 |
| C  | -11.84300 | -0.67100 | 0.23200  |
| H  | -12.79300 | -1.18500 | 0.41000  |

23) Neutral HS configuration for  $N_c = 7$ , Charge = 0,  $S = 2$

|   |         |          |          |
|---|---------|----------|----------|
| H | 3.06900 | -3.36700 | -1.05500 |
| H | 4.68600 | -3.90800 | -2.16900 |
| H | 2.89300 | 1.15500  | -3.09700 |
| H | 3.60100 | -0.24500 | -5.37700 |
| H | 4.39600 | -2.70900 | -4.36800 |
| H | 6.68000 | -3.96000 | -0.63300 |
| H | 7.74000 | -2.61800 | 1.55700  |
| H | 5.83500 | -0.66700 | 2.06600  |

|    |          |          |          |
|----|----------|----------|----------|
| B  | 4.13900  | -3.01000 | -1.54000 |
| C  | 3.25100  | 0.13000  | -3.19100 |
| C  | 3.62000  | -0.58100 | -4.34200 |
| C  | 4.02500  | -1.82400 | -3.85400 |
| C  | 6.29000  | -3.11400 | -0.06900 |
| C  | 6.80400  | -2.43000 | 1.03300  |
| C  | 5.84500  | -1.44400 | 1.30300  |
| N  | 3.41500  | -0.62900 | -2.09800 |
| N  | 4.82700  | -1.53800 | 0.43200  |
| N  | 3.89000  | -1.82300 | -2.51300 |
| N  | 5.11000  | -2.56100 | -0.40900 |
| H  | 3.06800  | 3.36700  | 1.05500  |
| H  | 4.68400  | 3.90800  | 2.16900  |
| H  | 2.89300  | -1.15500 | 3.09700  |
| H  | 3.59900  | 0.24400  | 5.37700  |
| H  | 4.39400  | 2.70900  | 4.36800  |
| H  | 6.67900  | 3.96000  | 0.63400  |
| H  | 7.74000  | 2.61900  | -1.55500 |
| H  | 5.83600  | 0.66800  | -2.06600 |
| B  | 4.13700  | 3.01100  | 1.54000  |
| C  | 3.25000  | -0.13100 | 3.19000  |
| C  | 3.61800  | 0.58100  | 4.34200  |
| C  | 4.02300  | 1.82400  | 3.85400  |
| C  | 6.28900  | 3.11500  | 0.07000  |
| C  | 6.80400  | 2.43100  | -1.03200 |
| C  | 5.84500  | 1.44400  | -1.30200 |
| N  | 3.41400  | 0.62900  | 2.09800  |
| N  | 4.82700  | 1.53800  | -0.43200 |
| N  | 3.88800  | 1.82300  | 2.51300  |
| N  | 5.10900  | 2.56100  | 0.41000  |
| Fe | 3.38400  | -0.00000 | -0.00000 |
| H  | 2.65200  | -2.85000 | 1.19000  |
| H  | 0.59500  | -4.19800 | 1.76800  |
| H  | -1.64300 | -3.20600 | 1.34900  |
| H  | -1.64300 | 3.20600  | -1.34900 |
| H  | 0.59500  | 4.19800  | -1.76800 |
| H  | 2.65200  | 2.84900  | -1.19000 |
| C  | 1.64700  | -2.45600 | 1.02700  |
| C  | 0.50000  | -3.19600 | 1.34500  |
| C  | -0.74600 | -2.63400 | 1.10700  |
| C  | -0.84900 | -1.33800 | 0.56000  |
| C  | 0.36600  | -0.67700 | 0.28000  |
| C  | -2.12900 | -0.67200 | 0.28100  |
| C  | 1.64700  | 2.45600  | -1.02700 |
| C  | 0.50000  | 3.19500  | -1.34500 |
| C  | -0.74600 | 2.63400  | -1.10700 |
| C  | -0.84900 | 1.33800  | -0.56000 |
| C  | 0.36600  | 0.67700  | -0.28100 |
| C  | -2.12900 | 0.67100  | -0.28100 |
| N  | 1.56900  | -1.23700 | 0.51000  |
| N  | 1.56900  | 1.23600  | -0.51000 |
| C  | -3.33800 | 1.28900  | -0.54000 |
| H  | -3.36400 | 2.29500  | -0.96000 |
| C  | -3.33800 | -1.28900 | 0.53900  |
| H  | -3.36400 | -2.29600 | 0.96000  |
| C  | -4.59100 | 0.66800  | -0.28000 |
| C  | -4.59100 | -0.66800 | 0.28000  |
| C  | -7.04200 | -0.67100 | 0.28100  |

|   |           |          |          |
|---|-----------|----------|----------|
| C | -7.04200  | 0.67100  | -0.28100 |
| C | -5.80900  | -1.30100 | 0.54400  |
| C | -5.80900  | 1.30100  | -0.54500 |
| H | -5.80800  | -2.31000 | 0.96700  |
| H | -5.80800  | 2.31000  | -0.96700 |
| C | -8.28000  | 1.30000  | -0.54400 |
| C | -8.28000  | -1.30000 | 0.54400  |
| C | -9.49500  | 0.67000  | -0.28100 |
| C | -9.49500  | -0.67100 | 0.28100  |
| H | -8.28000  | 2.30900  | -0.96700 |
| H | -8.28000  | -2.30900 | 0.96700  |
| C | -10.75600 | 1.30200  | -0.54500 |
| H | -10.75400 | 2.31100  | -0.96800 |
| C | -10.75600 | -1.30200 | 0.54500  |
| H | -10.75400 | -2.31100 | 0.96800  |
| C | -11.93600 | 0.66100  | -0.27700 |
| H | -12.89000 | 1.15500  | -0.48400 |
| C | -11.93600 | -0.66100 | 0.27700  |
| H | -12.89000 | -1.15500 | 0.48400  |

24) Reduced HS configuration for  $N_c = 7$ , Charge = -1,  $S = 3/2$

|   |         |          |          |
|---|---------|----------|----------|
| H | 3.29300 | -3.47500 | -0.89300 |
| H | 4.96400 | -3.91600 | -1.97900 |
| H | 2.70200 | 0.90500  | -3.13600 |
| H | 3.52800 | -0.53700 | -5.35600 |
| H | 4.55900 | -2.86200 | -4.22900 |
| H | 6.93600 | -3.73000 | -0.43900 |
| H | 7.84400 | -2.23500 | 1.72300  |
| H | 5.76600 | -0.44800 | 2.15000  |
| B | 4.32800 | -3.04600 | -1.38900 |
| C | 3.16100 | -0.08200 | -3.18600 |
| C | 3.58900 | -0.81500 | -4.30500 |
| C | 4.11300 | -1.98700 | -3.75800 |
| C | 6.46700 | -2.90600 | 0.09500  |
| C | 6.90300 | -2.14800 | 1.18300  |
| C | 5.85400 | -1.24400 | 1.41200  |
| N | 3.40500 | -0.76400 | -2.06000 |
| N | 4.86200 | -1.45300 | 0.53400  |
| N | 3.98600 | -1.92900 | -2.41700 |
| N | 5.24600 | -2.46900 | -0.27200 |
| H | 3.29300 | 3.47500  | 0.89300  |
| H | 4.96400 | 3.91600  | 1.97900  |
| H | 2.70200 | -0.90400 | 3.13700  |
| H | 3.52900 | 0.53800  | 5.35600  |
| H | 4.55900 | 2.86200  | 4.22900  |
| H | 6.93700 | 3.72900  | 0.43900  |
| H | 7.84400 | 2.23500  | -1.72300 |
| H | 5.76600 | 0.44800  | -2.15000 |
| B | 4.32900 | 3.04600  | 1.38900  |
| C | 3.16100 | 0.08200  | 3.18600  |
| C | 3.59000 | 0.81500  | 4.30500  |
| C | 4.11300 | 1.98700  | 3.75800  |
| C | 6.46700 | 2.90500  | -0.09500 |
| C | 6.90300 | 2.14700  | -1.18300 |
| C | 5.85400 | 1.24400  | -1.41200 |
| N | 3.40500 | 0.76400  | 2.06000  |
| N | 4.86200 | 1.45300  | -0.53400 |



|    |           |          |          |
|----|-----------|----------|----------|
| N  | 3.98600   | 1.92900  | 2.41700  |
| N  | 5.24700   | 2.46900  | 0.27200  |
| Fe | 3.32300   | -0.00000 | 0.00000  |
| H  | 2.62700   | -2.81400 | 1.30000  |
| H  | 0.55600   | -4.12600 | 1.92700  |
| H  | -1.67500  | -3.13800 | 1.46900  |
| H  | -1.67600  | 3.13800  | -1.46900 |
| H  | 0.55600   | 4.12600  | -1.92700 |
| H  | 2.62700   | 2.81400  | -1.29900 |
| C  | 1.62300   | -2.41800 | 1.12400  |
| C  | 0.46700   | -3.13900 | 1.46700  |
| C  | -0.77400  | -2.58100 | 1.20700  |
| C  | -0.88300  | -1.30300 | 0.60700  |
| C  | 0.34900   | -0.65800 | 0.30500  |
| C  | -2.15200  | -0.65600 | 0.30600  |
| C  | 1.62300   | 2.41800  | -1.12400 |
| C  | 0.46700   | 3.13900  | -1.46700 |
| C  | -0.77400  | 2.58100  | -1.20700 |
| C  | -0.88300  | 1.30300  | -0.60700 |
| C  | 0.34900   | 0.65800  | -0.30500 |
| C  | -2.15200  | 0.65600  | -0.30600 |
| N  | 1.55100   | -1.21900 | 0.56300  |
| N  | 1.55100   | 1.21900  | -0.56300 |
| C  | -3.37900  | 1.26300  | -0.59000 |
| H  | -3.40500  | 2.25300  | -1.05100 |
| C  | -3.37900  | -1.26300 | 0.59000  |
| H  | -3.40500  | -2.25300 | 1.05100  |
| C  | -4.63000  | 0.65900  | -0.30800 |
| C  | -4.63000  | -0.65900 | 0.30800  |
| C  | -7.10000  | -0.66100 | 0.30900  |
| C  | -7.10000  | 0.66100  | -0.30900 |
| C  | -5.85600  | -1.27400 | 0.59600  |
| C  | -5.85600  | 1.27400  | -0.59600 |
| H  | -5.85500  | -2.26700 | 1.05900  |
| H  | -5.85500  | 2.26700  | -1.05900 |
| C  | -8.33400  | 1.27200  | -0.59500 |
| C  | -8.33400  | -1.27200 | 0.59500  |
| C  | -9.56700  | 0.65600  | -0.30700 |
| C  | -9.56700  | -0.65600 | 0.30700  |
| H  | -8.33500  | 2.26400  | -1.05900 |
| H  | -8.33500  | -2.26400 | 1.05900  |
| C  | -10.82100 | 1.27100  | -0.59400 |
| H  | -10.81800 | 2.26300  | -1.05800 |
| C  | -10.82100 | -1.27100 | 0.59400  |
| H  | -10.81800 | -2.26300 | 1.05800  |
| C  | -12.01600 | 0.64300  | -0.30100 |
| H  | -12.96700 | 1.13600  | -0.53100 |
| C  | -12.01600 | -0.64300 | 0.30100  |
| H  | -12.96700 | -1.13600 | 0.53100  |

25) Neutral gas-phase L ligand of  $N_c = 2$ , Charge = 0,  $S = 0$

|   |             |             |             |
|---|-------------|-------------|-------------|
| H | 0.62669200  | 3.14378900  | -2.13182300 |
| H | 0.04512900  | 4.58496800  | -0.16406200 |
| H | -0.60454300 | 3.45099000  | 2.00017100  |
| H | 0.64065200  | -0.95131800 | 2.07571100  |
| H | -0.64065200 | 0.95131800  | 2.07571100  |
| H | 0.60454300  | -3.45099000 | 2.00017100  |

|   |             |             |             |
|---|-------------|-------------|-------------|
| H | -0.04512900 | -4.58496800 | -0.16406200 |
| H | -0.62669200 | -3.14378900 | -2.13182300 |
| C | 0.34352400  | 2.68636300  | -1.17461100 |
| C | 0.02177700  | 3.49509400  | -0.07771000 |
| C | -0.33196600 | 2.86580900  | 1.11655100  |
| C | -0.34352400 | 1.47138900  | 1.16211400  |
| C | -0.00027100 | 0.74695100  | 0.00643000  |
| C | -0.34352400 | -2.68636300 | -1.17461100 |
| C | -0.02177700 | -3.49509400 | -0.07771000 |
| C | 0.33196600  | -2.86580900 | 1.11655100  |
| C | 0.34352400  | -1.47138900 | 1.16211400  |
| C | 0.00027100  | -0.74695100 | 0.00643000  |
| N | 0.33278800  | 1.35680700  | -1.13952000 |
| N | -0.33278800 | -1.35680700 | -1.13952000 |

26) Reduced gas-phase L ligand of  $N_c = 2$ , Charge =  $-1$ ,  $S = 1/2$

|   |             |             |             |
|---|-------------|-------------|-------------|
| H | 0.00061900  | 3.17252300  | -2.21878700 |
| H | 0.00019000  | 4.62683000  | -0.17228000 |
| H | -0.00083300 | 3.45261100  | 2.10516300  |
| H | 0.00048400  | -0.99913600 | 2.19009000  |
| H | -0.00048400 | 0.99913600  | 2.19009000  |
| H | 0.00083300  | -3.45261100 | 2.10516300  |
| H | -0.00019000 | -4.62683000 | -0.17228000 |
| H | -0.00061900 | -3.17252300 | -2.21878700 |
| C | 0.00042100  | 2.70264200  | -1.21803100 |
| C | -0.00011400 | 3.53596900  | -0.08216000 |
| C | -0.00033300 | 2.87629200  | 1.17067100  |
| C | -0.00030200 | 1.49628100  | 1.21678700  |
| C | 0.00011400  | 0.72053000  | 0.00374000  |
| C | -0.00042100 | -2.70264200 | -1.21803100 |
| C | 0.00011400  | -3.53596900 | -0.08216000 |
| C | 0.00033300  | -2.87629200 | 1.17067100  |
| C | 0.00030200  | -1.49628100 | 1.21678700  |
| C | -0.00011400 | -0.72053000 | 0.00374000  |
| N | 0.00040300  | 1.38474300  | -1.20717600 |
| N | -0.00040300 | -1.38474300 | -1.20717600 |

27) Neutral gas-phase L ligand of  $N_c = 3$ , Charge =  $0$ ,  $S = 0$

|   |             |             |             |
|---|-------------|-------------|-------------|
| H | 0.00007400  | 3.19367100  | -2.53576200 |
| H | -0.00014400 | 4.57611600  | -0.44102200 |
| H | -0.00008900 | 3.39146200  | 1.78274000  |
| H | 0.00002200  | 1.23991400  | 3.04599500  |
| H | -0.00002200 | -1.23991400 | 3.04599500  |
| H | 0.00008900  | -3.39146200 | 1.78274000  |
| H | 0.00014400  | -4.57611600 | -0.44102200 |
| H | -0.00007400 | -3.19367100 | -2.53576200 |
| C | 0.00032300  | 2.70130300  | -1.55370900 |
| C | 0.00000800  | 3.48430900  | -0.37720800 |
| C | -0.00000800 | 2.83280100  | 0.84111700  |
| C | -0.00000800 | 1.41884300  | 0.87216000  |
| C | -0.00017500 | 0.72972100  | -0.37766200 |
| C | 0.00001400  | 0.68187100  | 2.10443900  |
| C | -0.00032300 | -2.70130300 | -1.55370900 |
| C | -0.00000800 | -3.48430900 | -0.37720800 |
| C | 0.00000800  | -2.83280100 | 0.84111700  |
| C | 0.00000800  | -1.41884300 | 0.87216000  |
| C | 0.00017500  | -0.72972100 | -0.37766200 |

|   |             |             |             |
|---|-------------|-------------|-------------|
| C | -0.00001400 | -0.68187100 | 2.10443900  |
| N | 0.00008100  | 1.38237400  | -1.55811100 |
| N | -0.00008100 | -1.38237400 | -1.55811100 |

28) Reduced gas-phase L ligand of  $N_c = 3$ , Charge =  $-1$ ,  $S = 1/2$

|   |             |             |             |
|---|-------------|-------------|-------------|
| H | 0.00000300  | 3.20876300  | -2.55308600 |
| H | -0.00000900 | 4.59868000  | -0.45569900 |
| H | -0.00001800 | 3.43442600  | 1.77428100  |
| H | -0.00001000 | 1.25587100  | 3.05091000  |
| H | 0.00001000  | -1.25587100 | 3.05091000  |
| H | 0.00001800  | -3.43442600 | 1.77428100  |
| H | 0.00000900  | -4.59868000 | -0.45569900 |
| H | -0.00000300 | -3.20876300 | -2.55308600 |
| C | 0.00000200  | 2.72706100  | -1.56420800 |
| C | -0.00000200 | 3.50290600  | -0.39107200 |
| C | -0.00000600 | 2.86365300  | 0.83776900  |
| C | 0.00000200  | 1.43052300  | 0.89736300  |
| C | 0.00002800  | 0.74000500  | -0.37978900 |
| C | -0.00000300 | 0.70392300  | 2.10296300  |
| C | -0.00000200 | -2.72706100 | -1.56420800 |
| C | 0.00000200  | -3.50290600 | -0.39107200 |
| C | 0.00000600  | -2.86365300 | 0.83776900  |
| C | -0.00000200 | -1.43052300 | 0.89736300  |
| C | -0.00002800 | -0.74000500 | -0.37978900 |
| C | 0.00000300  | -0.70392300 | 2.10296300  |
| N | 0.00001400  | 1.38659400  | -1.54779400 |
| N | -0.00001400 | -1.38659400 | -1.54779400 |

29) Neutral gas-phase L ligand of  $N_c = 4$ , Charge =  $0$ ,  $S = 0$

|   |             |             |             |
|---|-------------|-------------|-------------|
| H | 3.47152300  | -3.13965500 | 0.00004100  |
| H | 1.39907300  | -4.56860300 | 0.00009200  |
| H | -0.82074200 | -3.45462700 | 0.00008300  |
| H | -0.82076900 | 3.45462000  | 0.00008400  |
| H | 1.39903700  | 4.56861300  | 0.00005100  |
| H | 3.47149800  | 3.13968300  | -0.00006400 |
| C | 2.47623600  | -2.67519600 | 0.00004900  |
| C | 1.32043800  | -3.47795700 | 0.00005100  |
| C | 0.08717400  | -2.84946100 | 0.00003100  |
| C | 0.01121000  | -1.43876000 | -0.00002400 |
| C | 1.24494600  | -0.73445200 | -0.00003600 |
| C | -1.25973400 | -0.71144600 | -0.00005700 |
| C | 2.47621500  | 2.67521500  | -0.00004400 |
| C | 1.32041000  | 3.47796700  | 0.00003600  |
| C | 0.08715100  | 2.84946100  | 0.00006600  |
| C | 0.01119900  | 1.43876000  | 0.00005300  |
| C | 1.24494100  | 0.73446100  | 0.00002800  |
| C | -1.25973900 | 0.71143600  | 0.00004900  |
| N | 2.43872100  | -1.35631700 | 0.00000800  |
| N | 2.43871100  | 1.35633600  | -0.00003900 |
| C | -2.50038300 | 1.38854700  | 0.00011000  |
| H | -2.52396400 | 2.47902500  | 0.00023300  |
| C | -2.50037300 | -1.38856600 | -0.00017400 |
| H | -2.52394600 | -2.47904400 | -0.00031900 |
| C | -3.70459200 | 0.70185400  | 0.00002700  |
| H | -4.64840500 | 1.25458500  | 0.00008700  |
| C | -3.70458700 | -0.70188200 | -0.00013600 |
| H | -4.64839600 | -1.25461900 | -0.00024200 |

30) Reduced gas-phase L ligand of  $N_c = 4$ , Charge =  $-1$ ,  $S = 1/2$

|   |             |             |             |
|---|-------------|-------------|-------------|
| H | 3.46658900  | 3.17234300  | 0.00019000  |
| H | 1.38941600  | 4.59439600  | -0.00187900 |
| H | -0.83718200 | 3.44003700  | -0.00159700 |
| H | -0.83735500 | -3.43999400 | 0.00053000  |
| H | 1.38918400  | -4.59446300 | 0.00102400  |
| H | 3.46643000  | -3.17251300 | 0.00024300  |
| C | 2.47338900  | 2.68862900  | -0.00010200 |
| C | 1.31729700  | 3.50260500  | -0.00094200 |
| C | 0.07908800  | 2.84275700  | -0.00080700 |
| C | 0.00925300  | 1.44763200  | 0.00009700  |
| C | 1.26104400  | 0.70960100  | 0.00021700  |
| C | -1.26179000 | 0.71522800  | 0.00054700  |
| C | 2.47325500  | -2.68874900 | 0.00028100  |
| C | 1.31711900  | -3.50266900 | 0.00045200  |
| C | 0.07894500  | -2.84276100 | 0.00020300  |
| C | 0.00917900  | -1.44763000 | -0.00025800 |
| C | 1.26100800  | -0.70966100 | 0.00001300  |
| C | -1.26182500 | -0.71516800 | -0.00058200 |
| N | 2.47124800  | 1.37811000  | 0.00041000  |
| N | 2.47117700  | -1.37823200 | 0.00010800  |
| C | -2.50916300 | -1.38256100 | -0.00174300 |
| H | -2.52954400 | -2.47422600 | -0.00340700 |
| C | -2.50909400 | 1.38268200  | 0.00189900  |
| H | -2.52942200 | 2.47434700  | 0.00368400  |
| C | -3.72261200 | -0.69967600 | -0.00092500 |
| H | -4.66511700 | -1.25842100 | -0.00187300 |
| C | -3.72257900 | 0.69985700  | 0.00118200  |
| H | -4.66505600 | 1.25864800  | 0.00227000  |

31) Neutral gas-phase L ligand of  $N_c = 5$ , Charge =  $0$ ,  $S = 0$

|   |             |             |             |
|---|-------------|-------------|-------------|
| H | -4.49323400 | 3.13438400  | -0.00079300 |
| H | -2.42417500 | 4.56983300  | 0.00044100  |
| H | -0.20179500 | 3.46033400  | 0.00085700  |
| H | -0.20179500 | -3.46033400 | -0.00087100 |
| H | -2.42417500 | -4.56983300 | -0.00044900 |
| H | -4.49323400 | -3.13438400 | 0.00080000  |
| C | -3.49599600 | 2.67433100  | -0.00033100 |
| C | -2.34381100 | 3.47936700  | 0.00012200  |
| C | -1.10818900 | 2.85268300  | 0.00033400  |
| C | -1.02847400 | 1.44398400  | 0.00005600  |
| C | -2.25891500 | 0.73671100  | -0.00035100 |
| C | 0.24938300  | 0.72035900  | 0.00004200  |
| C | -3.49599600 | -2.67433100 | 0.00033500  |
| C | -2.34381100 | -3.47936700 | -0.00012600 |
| C | -1.10818900 | -2.85268300 | -0.00034100 |
| C | -1.02847400 | -1.44398400 | -0.00005800 |
| C | -2.25891500 | -0.73671100 | 0.00035400  |
| C | 0.24938300  | -0.72035900 | -0.00004400 |
| N | -3.45306300 | 1.35416700  | -0.00049600 |
| N | -3.45306300 | -1.35416700 | 0.00050200  |
| C | 1.46993000  | -1.39103400 | -0.00003700 |
| H | 1.49701400  | -2.48187300 | 0.00000200  |
| C | 1.46993000  | 1.39103400  | 0.00003600  |
| H | 1.49701400  | 2.48187300  | -0.00000200 |
| C | 2.70802000  | 0.71712300  | 0.00000200  |

|   |            |             |             |
|---|------------|-------------|-------------|
| C | 2.70802000 | -0.71712300 | -0.00000200 |
| C | 5.14345100 | 0.71138300  | -0.00000700 |
| H | 6.09535000 | 1.25045900  | -0.00002300 |
| H | 3.95211200 | -2.50155200 | 0.00002700  |
| C | 5.14345100 | -0.71138300 | 0.00001000  |
| H | 6.09535000 | -1.25045900 | 0.00002600  |
| C | 3.95562900 | -1.40712800 | 0.00001500  |
| C | 3.95562900 | 1.40712800  | -0.00001300 |
| H | 3.95211200 | 2.50155100  | -0.00002500 |

32) Reduced gas-phase L ligand of  $N_c = 5$ , Charge =  $-1$ ,  $S = 1/2$

|   |             |             |             |
|---|-------------|-------------|-------------|
| H | -4.50065500 | 3.15887400  | 0.00033700  |
| H | -2.40953500 | 4.57489500  | 0.00096800  |
| H | -0.20022200 | 3.43867900  | 0.00094300  |
| H | -0.20022200 | -3.43867900 | -0.00096100 |
| H | -2.40953600 | -4.57489500 | -0.00098000 |
| H | -4.50065500 | -3.15887400 | -0.00032900 |
| C | -3.50758600 | 2.68369500  | 0.00036700  |
| C | -2.34006600 | 3.48204200  | 0.00047500  |
| C | -1.11472800 | 2.84215500  | 0.00042700  |
| C | -1.03282600 | 1.42700000  | -0.00004900 |
| C | -2.28938800 | 0.72487100  | 0.00005900  |
| C | 0.23950900  | 0.71979800  | -0.00029900 |
| C | -3.50758600 | -2.68369400 | -0.00036400 |
| C | -2.34006600 | -3.48204200 | -0.00048100 |
| C | -1.11472800 | -2.84215500 | -0.00043600 |
| C | -1.03282600 | -1.42700000 | 0.00004600  |
| C | -2.28938800 | -0.72487100 | -0.00005500 |
| C | 0.23950900  | -0.71979800 | 0.00029800  |
| N | -3.47938900 | 1.36746900  | 0.00021400  |
| N | -3.47938900 | -1.36746900 | -0.00020600 |
| C | 1.47556300  | -1.39301000 | 0.00093000  |
| H | 1.50423200  | -2.48480300 | 0.00182800  |
| C | 1.47556300  | 1.39301000  | -0.00093000 |
| H | 1.50423200  | 2.48480300  | -0.00182500 |
| C | 2.72651600  | 0.72093000  | -0.00055200 |
| C | 2.72651600  | -0.72093000 | 0.00055200  |
| C | 5.18288800  | 0.70129300  | -0.00056400 |
| H | 6.13067800  | 1.25178900  | -0.00101500 |
| H | 3.96792800  | -2.49590200 | 0.00196300  |
| C | 5.18288800  | -0.70129300 | 0.00056600  |
| H | 6.13067800  | -1.25178900 | 0.00101700  |
| C | 3.97066600  | -1.39961700 | 0.00111100  |
| C | 3.97066500  | 1.39961700  | -0.00111000 |
| H | 3.96792800  | 2.49590200  | -0.00196100 |

33) Neutral gas-phase L ligand of  $N_c = 6$ , Charge =  $0$ ,  $S = 0$

|   |            |             |             |
|---|------------|-------------|-------------|
| H | 5.57748300 | 3.13176600  | 0.00125300  |
| H | 3.51021100 | 4.57041100  | -0.00036700 |
| H | 1.28657200 | 3.46343400  | -0.00102200 |
| H | 1.28657200 | -3.46343400 | 0.00103000  |
| H | 3.51021100 | -4.57041100 | 0.00037000  |
| H | 5.57748300 | -3.13176600 | -0.00125900 |
| C | 4.57932500 | 2.67381100  | 0.00059300  |
| C | 3.42882800 | 3.48002400  | -0.00003500 |
| C | 2.19209300 | 2.85444200  | -0.00039300 |
| C | 2.11022200 | 1.44637500  | -0.00010100 |

|   |             |             |             |
|---|-------------|-------------|-------------|
| C | 3.33938800  | 0.73777400  | 0.00038900  |
| C | 0.82954600  | 0.72493200  | -0.00010700 |
| C | 4.57932500  | -2.67381100 | -0.00059600 |
| C | 3.42882800  | -3.48002400 | 0.00003700  |
| C | 2.19209300  | -2.85444200 | 0.00039700  |
| C | 2.11022200  | -1.44637500 | 0.00010200  |
| C | 3.33938800  | -0.73777400 | -0.00039100 |
| C | 0.82954600  | -0.72493200 | 0.00011000  |
| N | 4.53373000  | 1.35309400  | 0.00072300  |
| N | 4.53373000  | -1.35309400 | -0.00072800 |
| C | -0.38363600 | -1.39418100 | 0.00019900  |
| H | -0.41096900 | -2.48494200 | 0.00029100  |
| C | -0.38363600 | 1.39418100  | -0.00019600 |
| H | -0.41096900 | 2.48494200  | -0.00028900 |
| C | -1.63237100 | 0.72153100  | -0.00009300 |
| C | -1.63237100 | -0.72153100 | 0.00009500  |
| C | -4.08131500 | 0.72465500  | -0.00008700 |
| H | -2.85862300 | -2.50176900 | 0.00030700  |
| C | -4.08131500 | -0.72465500 | 0.00008600  |
| C | -2.85943400 | -1.40714000 | 0.00017300  |
| C | -2.85943400 | 1.40714000  | -0.00017100 |
| H | -2.85862300 | 2.50176900  | -0.00030300 |
| C | -5.33919500 | -1.40969400 | 0.00016100  |
| C | -5.33919500 | 1.40969400  | -0.00016300 |
| C | -6.52165500 | -0.71459200 | 0.00007900  |
| H | -7.47474500 | -1.25162900 | 0.00013700  |
| C | -6.52165500 | 0.71459200  | -0.00008100 |
| H | -7.47474500 | 1.25162900  | -0.00014000 |
| H | -5.33682000 | -2.50403500 | 0.00028300  |
| H | -5.33682000 | 2.50403500  | -0.00028700 |

34) Reduced gas-phase L ligand of  $N_c = 6$ , Charge =  $-1$ ,  $S = 1/2$

|   |             |             |             |
|---|-------------|-------------|-------------|
| H | -5.58828000 | -3.15145000 | 0.00022400  |
| H | -3.50459100 | -4.57209700 | -0.00057300 |
| H | -1.28951700 | -3.44470000 | -0.00078800 |
| H | -1.28951700 | 3.44470000  | 0.00078800  |
| H | -3.50459100 | 4.57209700  | 0.00057300  |
| H | -5.58828000 | 3.15145000  | -0.00022400 |
| C | -4.59345600 | -2.68169500 | -0.00003300 |
| C | -3.43168700 | -3.47960100 | -0.00026000 |
| C | -2.20192400 | -2.84585000 | -0.00033700 |
| C | -2.11895700 | -1.43097200 | -0.00001700 |
| C | -3.36745200 | -0.73085900 | 0.00025300  |
| C | -0.84752800 | -0.71992100 | 0.00006200  |
| C | -4.59345600 | 2.68169500  | 0.00003300  |
| C | -3.43168700 | 3.47960100  | 0.00026000  |
| C | -2.20192400 | 2.84585100  | 0.00033700  |
| C | -2.11895700 | 1.43097200  | 0.00001700  |
| C | -3.36745200 | 0.73085900  | -0.00025300 |
| C | -0.84752800 | 0.71992100  | -0.00006300 |
| N | -4.55855900 | -1.36245700 | 0.00018300  |
| N | -4.55855900 | 1.36245700  | -0.00018200 |
| C | 0.38483000  | 1.39223700  | -0.00020800 |
| H | 0.41243100  | 2.48411900  | -0.00046500 |
| C | 0.38483000  | -1.39223700 | 0.00020800  |
| H | 0.41243100  | -2.48411900 | 0.00046500  |
| C | 1.63533900  | -0.72633900 | 0.00013700  |

|   |            |             |             |
|---|------------|-------------|-------------|
| C | 1.63533900 | 0.72633900  | -0.00013700 |
| C | 4.10852500 | -0.72423900 | 0.00016500  |
| H | 2.86795700 | 2.50032200  | -0.00053300 |
| C | 4.10852500 | 0.72423900  | -0.00016500 |
| C | 2.86780300 | 1.40411700  | -0.00030500 |
| C | 2.86780300 | -1.40411700 | 0.00030400  |
| H | 2.86795700 | -2.50032200 | 0.00053300  |
| C | 5.35913100 | 1.39988000  | -0.00032600 |
| C | 5.35913100 | -1.39988000 | 0.00032600  |
| C | 6.56267200 | 0.70602000  | -0.00016500 |
| H | 7.51170400 | 1.25376700  | -0.00029300 |
| C | 6.56267200 | -0.70602000 | 0.00016600  |
| H | 7.51170400 | -1.25376700 | 0.00029500  |
| H | 5.35643800 | 2.49607600  | -0.00058100 |
| H | 5.35643800 | -2.49607600 | 0.00058100  |

35) Neutral gas-phase L ligand of  $N_c = 7$ , Charge = 0,  $S = 0$

|   |             |             |             |
|---|-------------|-------------|-------------|
| H | 6.69963000  | 3.13049800  | 0.00035600  |
| H | 4.63325300  | 4.57073000  | -0.00118100 |
| H | 2.40897600  | 3.46503400  | -0.00141100 |
| H | 2.40897600  | -3.46503400 | 0.00141100  |
| H | 4.63325300  | -4.57073000 | 0.00118100  |
| H | 6.69963000  | -3.13049800 | -0.00035600 |
| C | 5.70101900  | 2.67359200  | -0.00005300 |
| C | 4.55135600  | 3.48038100  | -0.00062800 |
| C | 3.31406100  | 2.85537500  | -0.00071000 |
| C | 3.23110300  | 1.44758200  | -0.00014100 |
| C | 4.45970100  | 0.73831000  | 0.00027200  |
| C | 1.94922000  | 0.72723000  | 0.00005400  |
| C | 5.70101900  | -2.67359200 | 0.00005200  |
| C | 4.55135600  | -3.48038100 | 0.00062800  |
| C | 3.31406100  | -2.85537500 | 0.00071100  |
| C | 3.23110300  | -1.44758200 | 0.00014100  |
| C | 4.45970100  | -0.73831000 | -0.00027200 |
| C | 1.94922000  | -0.72723000 | -0.00005400 |
| N | 5.65410100  | 1.35257400  | 0.00029400  |
| N | 5.65410100  | -1.35257400 | -0.00029400 |
| C | 0.73925800  | -1.39576300 | -0.00034900 |
| H | 0.71202600  | -2.48652800 | -0.00071000 |
| C | 0.73925800  | 1.39576300  | 0.00034900  |
| H | 0.71202600  | 2.48652800  | 0.00071000  |
| C | -0.51450200 | 0.72428400  | 0.00025700  |
| C | -0.51450200 | -0.72428400 | -0.00025700 |
| C | -2.96599400 | 0.72773600  | 0.00029200  |
| H | -1.73205200 | -2.50413500 | -0.00096000 |
| C | -2.96599400 | -0.72773600 | -0.00029200 |
| C | -1.73294000 | -1.40964100 | -0.00054800 |
| C | -1.73294000 | 1.40964100  | 0.00054800  |
| H | -1.73205200 | 2.50413500  | 0.00096000  |
| C | -4.20410600 | -1.40858600 | -0.00057500 |
| C | -4.20410600 | 1.40858600  | 0.00057500  |
| C | -5.41954200 | -0.72687000 | -0.00029900 |
| C | -5.41954200 | 0.72687000  | 0.00029900  |
| H | -4.20436500 | -2.50311600 | -0.00102300 |
| H | -4.20436500 | 2.50311600  | 0.00102300  |
| C | -6.68124000 | 1.41135200  | 0.00058300  |
| H | -6.67900400 | 2.50569200  | 0.00103600  |

|   |             |             |             |
|---|-------------|-------------|-------------|
| C | -6.68124000 | -1.41135200 | -0.00058300 |
| H | -6.67900400 | -2.50569200 | -0.00103600 |
| C | -7.86110600 | 0.71637100  | 0.00029600  |
| H | -8.81490300 | 1.25216900  | 0.00051900  |
| C | -7.86110600 | -0.71637100 | -0.00029600 |
| H | -8.81490300 | -1.25216900 | -0.00051900 |

36) Neutral gas-phase L ligand of  $N_c = 7$ , Charge =  $-1$ ,  $S = 1/2$

|   |             |             |             |
|---|-------------|-------------|-------------|
| H | -6.71363900 | 3.14623700  | -0.00085200 |
| H | -4.63434800 | 4.57135700  | 0.00141200  |
| H | -2.41599700 | 3.44893300  | 0.00192400  |
| H | -2.41599700 | -3.44893300 | -0.00192400 |
| H | -4.63434800 | -4.57135700 | -0.00141200 |
| H | -6.71363900 | -3.14623700 | 0.00085200  |
| C | -5.71743800 | 2.68004000  | -0.00025600 |
| C | -4.55931800 | 3.47924500  | 0.00076600  |
| C | -3.32693900 | 2.84800000  | 0.00109400  |
| C | -3.24291000 | 1.43490700  | 0.00044900  |
| C | -4.48669700 | 0.73341000  | 0.00060100  |
| C | -1.97029000 | 0.72101600  | -0.00002600 |
| C | -5.71743800 | -2.68004000 | 0.00025600  |
| C | -4.55931800 | -3.47924600 | -0.00076600 |
| C | -3.32693900 | -2.84800000 | -0.00109400 |
| C | -3.24291000 | -1.43490700 | -0.00044900 |
| C | -4.48669700 | -0.73341000 | -0.00060100 |
| C | -1.97029000 | -0.72101600 | 0.00002600  |
| N | -5.67902900 | 1.35983200  | -0.00008900 |
| N | -5.67902900 | -1.35983200 | 0.00008900  |
| C | -0.74185700 | -1.39149400 | 0.00047500  |
| H | -0.71460700 | -2.48349100 | 0.00093500  |
| C | -0.74185700 | 1.39149400  | -0.00047500 |
| H | -0.71460700 | 2.48349100  | -0.00093500 |
| C | 0.50758700  | 0.72716900  | -0.00036400 |
| C | 0.50758700  | -0.72716900 | 0.00036400  |
| C | 2.98036600  | 0.73077900  | -0.00043000 |
| H | 1.73689400  | -2.50241400 | 0.00136000  |
| C | 2.98036600  | -0.73077900 | 0.00043000  |
| C | 1.73757700  | -1.40651500 | 0.00078500  |
| C | 1.73757700  | 1.40651500  | -0.00078500 |
| H | 1.73689400  | 2.50241400  | -0.00136000 |
| C | 4.21638100  | -1.40379000 | 0.00084900  |
| C | 4.21638100  | 1.40379000  | -0.00084900 |
| C | 5.45066900  | -0.72459300 | 0.00044200  |
| C | 5.45066900  | 0.72459300  | -0.00044200 |
| H | 4.21766400  | -2.49982300 | 0.00151300  |
| H | 4.21766400  | 2.49982300  | -0.00151300 |
| C | 6.70481300  | 1.40177300  | -0.00086000 |
| H | 6.70166700  | 2.49779100  | -0.00153300 |
| C | 6.70481300  | -1.40177300 | 0.00085900  |
| H | 6.70166700  | -2.49779100 | 0.00153300  |
| C | 7.90193800  | 0.70949100  | -0.00043600 |
| H | 8.85226500  | 1.25443600  | -0.00077300 |
| C | 7.90193800  | -0.70949100 | 0.00043600  |
| H | 8.85226500  | -1.25443600 | 0.00077300  |

37) Neutral gas-phase HS  $\text{Fe}[\text{H}_2\text{B}(\text{Pz})_2]_2$  fragment, Charge =  $0$ ,  $S = 2$

|    |            |            |            |
|----|------------|------------|------------|
| Fe | 0.00000000 | 0.00000000 | 0.22893100 |
|----|------------|------------|------------|



|   |             |             |             |
|---|-------------|-------------|-------------|
| H | -0.45799400 | 2.55358200  | 1.60826200  |
| H | 0.69328300  | 4.17744100  | 1.08266200  |
| H | 3.07863500  | -0.74432700 | 1.40217100  |
| H | 4.78238700  | 1.34980800  | 2.04225000  |
| H | 3.17872200  | 3.58961800  | 1.68893300  |
| H | 0.13507700  | 4.74329700  | -1.42268600 |
| H | -0.84524300 | 3.47706300  | -3.69215500 |
| H | -1.12429200 | 0.84395500  | -2.86454100 |
| B | 0.44027800  | 2.99797200  | 0.89245400  |
| C | 2.88990200  | 0.32923200  | 1.40885300  |
| C | 3.74210500  | 1.39499400  | 1.72661900  |
| C | 2.95100200  | 2.53404300  | 1.55149000  |
| C | -0.12703800 | 3.69950900  | -1.58654900 |
| C | -0.62241100 | 3.04507200  | -2.71862500 |
| C | -0.76954100 | 1.71286400  | -2.31015800 |
| N | 1.67908100  | 0.80179500  | 1.07337600  |
| N | -0.39302000 | 1.58509800  | -1.02738800 |
| N | 1.72391100  | 2.15218000  | 1.15901900  |
| N | 0.00000000  | 2.80475400  | -0.59258500 |
| H | 0.45799400  | -2.55358200 | 1.60826200  |
| H | -0.69328300 | -4.17744100 | 1.08266200  |
| H | -3.07863500 | 0.74432700  | 1.40217100  |
| H | -4.78238700 | -1.34980800 | 2.04225000  |
| H | -3.17872200 | -3.58961800 | 1.68893300  |
| H | -0.13507700 | -4.74329700 | -1.42268600 |
| H | 0.84524300  | -3.47706300 | -3.69215500 |
| H | 1.12429200  | -0.84395500 | -2.86454100 |
| B | -0.44027800 | -2.99797200 | 0.89245400  |
| C | -2.88990200 | -0.32923200 | 1.40885300  |
| C | -3.74210500 | -1.39499400 | 1.72661900  |
| C | -2.95100200 | -2.53404300 | 1.55149000  |
| C | 0.12703800  | -3.69950900 | -1.58654900 |
| C | 0.62241100  | -3.04507200 | -2.71862500 |
| C | 0.76954100  | -1.71286400 | -2.31015800 |
| N | -1.67908100 | -0.80179500 | 1.07337600  |
| N | 0.39302000  | -1.58509800 | -1.02738800 |
| N | -1.72391100 | -2.15218000 | 1.15901900  |
| N | 0.00000000  | -2.80475400 | -0.59258500 |

38) Neutral gas-phase LS  $\text{Fe}[\text{H}_2\text{B}(\text{Pz})_2]_2$  fragment, Charge = 0,  $S = 0$

|    |             |             |             |
|----|-------------|-------------|-------------|
| Fe | 0.00000000  | 0.00000000  | 0.41489700  |
| H  | -0.47584600 | 1.29867000  | 1.70861900  |
| H  | -0.25687600 | 3.32181300  | 2.01834100  |
| H  | 3.47778400  | -0.12145600 | -0.05145200 |
| H  | 4.76700500  | 2.20204300  | 0.76687200  |
| H  | 2.68392300  | 3.80255500  | 1.66348500  |
| H  | -1.15289800 | 4.55922100  | -0.56418200 |
| H  | -1.81788400 | 3.49142600  | -3.03901600 |
| H  | -1.20131500 | 0.79436200  | -2.75501200 |
| B  | 0.00000000  | 2.39698500  | 1.27067100  |
| C  | 3.06123700  | 0.79251900  | 0.37053700  |
| C  | 3.70225900  | 1.97811300  | 0.78726800  |
| C  | 2.67085600  | 2.79788000  | 1.24403100  |
| C  | -1.07875900 | 3.53806500  | -0.93439700 |
| C  | -1.40591900 | 2.98132000  | -2.17051900 |
| C  | -1.09560200 | 1.61083500  | -2.04161900 |
| N  | 1.74753100  | 0.90577500  | 0.57047500  |

|   |             |             |             |
|---|-------------|-------------|-------------|
| N | -0.61838900 | 1.38144100  | -0.81698300 |
| N | 1.51225700  | 2.12222400  | 1.10244400  |
| N | -0.61223600 | 2.54866000  | -0.14543300 |
| H | 0.47584600  | -1.29867000 | 1.70861900  |
| H | 0.25687600  | -3.32181300 | 2.01834100  |
| H | -3.47778400 | 0.12145600  | -0.05145200 |
| H | -4.76700500 | -2.20204300 | 0.76687200  |
| H | -2.68392300 | -3.80255500 | 1.66348500  |
| H | 1.15289800  | -4.55922100 | -0.56418200 |
| H | 1.81788400  | -3.49142600 | -3.03901600 |
| H | 1.20131500  | -0.79436200 | -2.75501200 |
| B | 0.00000000  | -2.39698500 | 1.27067100  |
| C | -3.06123700 | -0.79251900 | 0.37053700  |
| C | -3.70225900 | -1.97811300 | 0.78726800  |
| C | -2.67085600 | -2.79788000 | 1.24403100  |
| C | 1.07875900  | -3.53806500 | -0.93439700 |
| C | 1.40591900  | -2.98132000 | -2.17051900 |
| C | 1.09560200  | -1.61083500 | -2.04161900 |
| N | -1.74753100 | -0.90577500 | 0.57047500  |
| N | 0.61838900  | -1.38144100 | -0.81698300 |
| N | -1.51225700 | -2.12222400 | 1.10244400  |
| N | 0.61223600  | -2.54866000 | -0.14543300 |

39) Another neutral LS complex for  $N_c = 4$ , Charge = 0,  $S = 0$

|   |          |          |          |
|---|----------|----------|----------|
| H | -3.03500 | 0.65100  | 2.00900  |
| H | -2.93700 | 2.35300  | 3.10100  |
| H | 1.91900  | -0.02500 | 2.46800  |
| H | 1.27000  | 0.56900  | 5.07400  |
| H | -1.28200 | 1.65300  | 4.85200  |
| H | -3.53600 | 4.11100  | 1.40100  |
| H | -2.73600 | 5.00500  | -1.10600 |
| H | -0.91100 | 3.08600  | -1.89600 |
| B | -2.38400 | 1.66300  | 2.25300  |
| C | 0.99700  | 0.39800  | 2.85500  |
| C | 0.66600  | 0.71300  | 4.18100  |
| C | -0.61000 | 1.26400  | 4.09000  |
| C | -2.83600 | 3.68100  | 0.68800  |
| C | -2.42500 | 4.11000  | -0.57200 |
| C | -1.50300 | 3.13600  | -0.98600 |
| N | -0.00800 | 0.73000  | 2.03000  |
| N | -1.38300 | 2.18500  | -0.04700 |
| N | -0.98800 | 1.26000  | 2.79500  |
| N | -2.19800 | 2.52700  | 0.97900  |
| H | 3.03500  | 0.65100  | -2.00900 |
| H | 2.93700  | 2.35300  | -3.10100 |
| H | -1.91900 | -0.02500 | -2.46800 |
| H | -1.27000 | 0.56900  | -5.07400 |
| H | 1.28200  | 1.65300  | -4.85200 |
| H | 3.53600  | 4.11100  | -1.40100 |
| H | 2.73600  | 5.00500  | 1.10600  |
| H | 0.91100  | 3.08600  | 1.89600  |
| B | 2.38400  | 1.66300  | -2.25300 |
| C | -0.99700 | 0.39800  | -2.85500 |
| C | -0.66600 | 0.71300  | -4.18100 |
| C | 0.61000  | 1.26400  | -4.09000 |
| C | 2.83600  | 3.68100  | -0.68800 |
| C | 2.42500  | 4.11000  | 0.57200  |

|    |          |          |          |
|----|----------|----------|----------|
| C  | 1.50300  | 3.13600  | 0.98600  |
| N  | 0.00800  | 0.73000  | -2.03000 |
| N  | 1.38300  | 2.18500  | 0.04700  |
| N  | 0.98800  | 1.26000  | -2.79500 |
| N  | 2.19800  | 2.52700  | -0.97900 |
| Fe | -0.00000 | 0.72400  | 0.00000  |
| H  | -3.00400 | 0.35900  | -0.21600 |
| H  | -1.05200 | -4.15700 | -0.03500 |
| H  | 1.05200  | -4.15700 | 0.03500  |
| H  | 3.00400  | 0.35900  | 0.21600  |
| C  | -2.61000 | -0.65500 | -0.15100 |
| C  | -3.49300 | -1.76300 | -0.19000 |
| C  | -2.92600 | -3.07300 | -0.13700 |
| C  | -1.51400 | -3.16900 | -0.06100 |
| C  | -0.73600 | -2.02900 | -0.02700 |
| C  | 0.73600  | -2.02900 | 0.02700  |
| C  | 1.51400  | -3.16900 | 0.06100  |
| C  | 2.92600  | -3.07300 | 0.13700  |
| C  | 3.49300  | -1.76300 | 0.19000  |
| C  | 2.61000  | -0.65500 | 0.15100  |
| N  | -1.30000 | -0.77400 | -0.05800 |
| N  | 1.30000  | -0.77400 | 0.05800  |
| C  | 3.79100  | -4.19800 | 0.17100  |
| H  | 3.36100  | -5.20300 | 0.13100  |
| C  | 4.90000  | -1.60500 | 0.27300  |
| C  | 5.71800  | -2.71600 | 0.30500  |
| C  | 5.15800  | -4.02000 | 0.25400  |
| H  | 5.32000  | -0.59600 | 0.30400  |
| C  | -3.79100 | -4.19800 | -0.17100 |
| H  | -3.36100 | -5.20300 | -0.13100 |
| C  | -4.90000 | -1.60500 | -0.27300 |
| C  | -5.71800 | -2.71600 | -0.30500 |
| C  | -5.15800 | -4.02000 | -0.25400 |
| H  | -5.32000 | -0.59600 | -0.30400 |
| H  | -6.80400 | -2.59800 | -0.36500 |
| H  | -5.82000 | -4.89000 | -0.27900 |
| H  | 5.82000  | -4.89000 | 0.27900  |
| H  | 6.80400  | -2.59800 | 0.36500  |

40) Another reduced LS complex for  $N_c = 4$ , Charge = -1,  $S = 1/2$

|   |          |          |          |
|---|----------|----------|----------|
| H | -3.07600 | 0.85500  | 2.07000  |
| H | -2.80800 | 2.57700  | 3.11100  |
| H | 1.80500  | -0.23600 | 2.45600  |
| H | 1.20900  | 0.39500  | 5.07500  |
| H | -1.23400 | 1.71200  | 4.85500  |
| H | -3.39400 | 4.27600  | 1.36200  |
| H | -2.66800 | 5.01700  | -1.22000 |
| H | -0.95000 | 2.99000  | -1.98300 |
| B | -2.33800 | 1.81400  | 2.26900  |
| C | 0.93200  | 0.27400  | 2.85200  |
| C | 0.62500  | 0.60700  | 4.18200  |
| C | -0.59400 | 1.27400  | 4.09200  |
| C | -2.73900 | 3.78800  | 0.64300  |
| C | -2.36700 | 4.13900  | -0.65300 |
| C | -1.50100 | 3.10800  | -1.05400 |
| N | -0.03300 | 0.70800  | 2.02900  |
| N | -1.37400 | 2.20200  | -0.07300 |

|    |          |          |          |
|----|----------|----------|----------|
| N  | -0.96500 | 1.31700  | 2.79500  |
| N  | -2.13000 | 2.62600  | 0.96300  |
| H  | 3.07600  | 0.85500  | -2.07000 |
| H  | 2.80800  | 2.57700  | -3.11100 |
| H  | -1.80500 | -0.23600 | -2.45600 |
| H  | -1.20900 | 0.39500  | -5.07500 |
| H  | 1.23400  | 1.71200  | -4.85500 |
| H  | 3.39400  | 4.27500  | -1.36200 |
| H  | 2.66800  | 5.01700  | 1.22000  |
| H  | 0.95000  | 2.99000  | 1.98300  |
| B  | 2.33800  | 1.81400  | -2.26900 |
| C  | -0.93200 | 0.27400  | -2.85200 |
| C  | -0.62500 | 0.60700  | -4.18200 |
| C  | 0.59400  | 1.27400  | -4.09200 |
| C  | 2.73900  | 3.78800  | -0.64300 |
| C  | 2.36700  | 4.13900  | 0.65300  |
| C  | 1.50100  | 3.10800  | 1.05400  |
| N  | 0.03300  | 0.70800  | -2.02900 |
| N  | 1.37400  | 2.20200  | 0.07300  |
| N  | 0.96500  | 1.31700  | -2.79500 |
| N  | 2.13000  | 2.62600  | -0.96300 |
| Fe | -0.00000 | 0.71100  | -0.00000 |
| H  | -3.00800 | 0.34300  | -0.16900 |
| H  | -1.06300 | -4.18700 | -0.04200 |
| H  | 1.06300  | -4.18700 | 0.04200  |
| H  | 3.00800  | 0.34300  | 0.16900  |
| C  | -2.61000 | -0.67200 | -0.12500 |
| C  | -3.50800 | -1.78300 | -0.16800 |
| C  | -2.92600 | -3.09800 | -0.13300 |
| C  | -1.52600 | -3.19900 | -0.06200 |
| C  | -0.71600 | -2.04100 | -0.02400 |
| C  | 0.71600  | -2.04100 | 0.02400  |
| C  | 1.52600  | -3.19900 | 0.06200  |
| C  | 2.92600  | -3.09800 | 0.13300  |
| C  | 3.50800  | -1.78300 | 0.16800  |
| C  | 2.61000  | -0.67200 | 0.12500  |
| N  | -1.30400 | -0.78900 | -0.04900 |
| N  | 1.30400  | -0.78900 | 0.04900  |
| C  | 3.81600  | -4.21500 | 0.17900  |
| H  | 3.39500  | -5.22600 | 0.15300  |
| C  | 4.90400  | -1.62200 | 0.24200  |
| C  | 5.74800  | -2.73000 | 0.28500  |
| C  | 5.18600  | -4.02700 | 0.25300  |
| H  | 5.31500  | -0.60700 | 0.25900  |
| C  | -3.81600 | -4.21500 | -0.17900 |
| H  | -3.39500 | -5.22600 | -0.15300 |
| C  | -4.90400 | -1.62200 | -0.24200 |
| C  | -5.74800 | -2.73000 | -0.28500 |
| C  | -5.18600 | -4.02700 | -0.25300 |
| H  | -5.31500 | -0.60700 | -0.25900 |
| H  | -5.84800 | -4.90000 | -0.28600 |
| H  | -6.83300 | -2.60100 | -0.34000 |
| H  | 5.84800  | -4.90000 | 0.28600  |
| H  | 6.83300  | -2.60100 | 0.34000  |

41) Another neutral HS complex for  $N_c = 4$ , Charge = 0,  $S = 2$

|   |          |          |          |
|---|----------|----------|----------|
| H | -2.89300 | -0.55900 | -2.04800 |
|---|----------|----------|----------|

|    |          |          |          |
|----|----------|----------|----------|
| H  | -3.04700 | -2.18500 | -3.26300 |
| H  | 2.03700  | -0.33700 | -2.60000 |
| H  | 1.40900  | -1.05300 | -5.19800 |
| H  | -1.23700 | -1.87600 | -4.99000 |
| H  | -3.55600 | -4.17100 | -1.80500 |
| H  | -2.94900 | -5.20900 | 0.70000  |
| H  | -1.26400 | -3.28500 | 1.77300  |
| B  | -2.39300 | -1.62600 | -2.39200 |
| C  | 1.09400  | -0.70600 | -3.00100 |
| C  | 0.77300  | -1.07900 | -4.31500 |
| C  | -0.55500 | -1.49800 | -4.23100 |
| C  | -2.92900 | -3.77100 | -1.01100 |
| C  | -2.61600 | -4.27400 | 0.25300  |
| C  | -1.76700 | -3.30500 | 0.80700  |
| N  | 0.03900  | -0.88100 | -2.19300 |
| N  | -1.59400 | -2.29300 | -0.05700 |
| N  | -0.96600 | -1.36600 | -2.95400 |
| N  | -2.30500 | -2.58800 | -1.17100 |
| H  | 2.89200  | -0.55500 | 2.04800  |
| H  | 3.04800  | -2.18000 | 3.26500  |
| H  | -2.03700 | -0.33500 | 2.59900  |
| H  | -1.41000 | -1.04900 | 5.19800  |
| H  | 1.23700  | -1.87100 | 4.99100  |
| H  | 3.55800  | -4.16800 | 1.80800  |
| H  | 2.95200  | -5.20800 | -0.69600 |
| H  | 1.26500  | -3.28700 | -1.77100 |
| B  | 2.39300  | -1.62200 | 2.39200  |
| C  | -1.09500 | -0.70300 | 3.00100  |
| C  | -0.77300 | -1.07500 | 4.31500  |
| C  | 0.55500  | -1.49400 | 4.23100  |
| C  | 2.93100  | -3.76800 | 1.01300  |
| C  | 2.61700  | -4.27300 | -0.25000 |
| C  | 1.76800  | -3.30500 | -0.80500 |
| N  | -0.04000 | -0.87900 | 2.19300  |
| N  | 1.59400  | -2.29200 | 0.05900  |
| N  | 0.96600  | -1.36300 | 2.95400  |
| N  | 2.30600  | -2.58600 | 1.17300  |
| Fe | -0.00000 | -0.83900 | -0.00000 |
| H  | -3.03100 | -0.16800 | 0.24100  |
| H  | -1.04100 | 4.33300  | 0.03500  |
| H  | 1.04000  | 4.33300  | -0.03600 |
| H  | 3.03100  | -0.16800 | -0.24300 |
| C  | -2.63100 | 0.84800  | 0.19400  |
| C  | -3.50600 | 1.96400  | 0.23900  |
| C  | -2.91800 | 3.26500  | 0.17900  |
| C  | -1.50700 | 3.34700  | 0.08100  |
| C  | -0.74100 | 2.19500  | 0.04600  |
| C  | 0.74100  | 2.19500  | -0.04700 |
| C  | 1.50600  | 3.34700  | -0.08200 |
| C  | 2.91800  | 3.26500  | -0.18000 |
| C  | 3.50600  | 1.96400  | -0.24100 |
| C  | 2.63100  | 0.84800  | -0.19600 |
| N  | -1.32600 | 0.96000  | 0.09900  |
| N  | 1.32600  | 0.96100  | -0.10100 |
| C  | 3.76900  | 4.40300  | -0.22000 |
| H  | 3.32600  | 5.40200  | -0.17400 |
| C  | 4.91400  | 1.82600  | -0.33600 |
| C  | 5.71600  | 2.94800  | -0.37200 |

|   |          |         |          |
|---|----------|---------|----------|
| C | 5.13600  | 4.24300 | -0.31500 |
| H | 5.34700  | 0.82200 | -0.37200 |
| C | -3.76900 | 4.40300 | 0.21900  |
| H | -3.32600 | 5.40200 | 0.17300  |
| C | -4.91500 | 1.82600 | 0.33400  |
| C | -5.71600 | 2.94800 | 0.37100  |
| C | -5.13700 | 4.24300 | 0.31400  |
| H | -5.34800 | 0.82200 | 0.37100  |
| H | -5.78600 | 5.12300 | 0.34400  |
| H | -6.80300 | 2.84600 | 0.44200  |
| H | 6.80200  | 2.84600 | -0.44300 |
| H | 5.78600  | 5.12300 | -0.34500 |

42) Another reduced HS complex for  $N_c = 4$ , Charge = -1,  $S = 3/2$

|    |          |          |          |
|----|----------|----------|----------|
| H  | 2.85000  | -0.81800 | 2.21400  |
| H  | 2.77300  | -2.50600 | 3.36100  |
| H  | -2.04100 | -0.09300 | 2.53500  |
| H  | -1.62100 | -0.95700 | 5.13800  |
| H  | 0.92900  | -2.06100 | 5.01300  |
| H  | 3.15400  | -4.46900 | 1.85400  |
| H  | 2.63100  | -5.32600 | -0.74100 |
| H  | 1.23300  | -3.18800 | -1.82200 |
| B  | 2.23000  | -1.84000 | 2.48200  |
| C  | -1.17100 | -0.58400 | 2.96800  |
| C  | -0.95200 | -1.03100 | 4.28200  |
| C  | 0.32500  | -1.59100 | 4.24000  |
| C  | 2.63100  | -3.97300 | 1.03800  |
| C  | 2.36300  | -4.38200 | -0.26800 |
| C  | 1.66200  | -3.30200 | -0.82800 |
| N  | -0.10600 | -0.85300 | 2.20200  |
| N  | 1.53000  | -2.31900 | 0.07400  |
| N  | 0.80500  | -1.46800 | 2.98500  |
| N  | 2.12200  | -2.73800 | 1.21400  |
| H  | -2.85000 | -0.81800 | -2.21400 |
| H  | -2.77300 | -2.50600 | -3.36100 |
| H  | 2.04100  | -0.09300 | -2.53500 |
| H  | 1.62100  | -0.95700 | -5.13800 |
| H  | -0.92900 | -2.06200 | -5.01300 |
| H  | -3.15400 | -4.47000 | -1.85300 |
| H  | -2.63100 | -5.32600 | 0.74100  |
| H  | -1.23300 | -3.18800 | 1.82200  |
| B  | -2.23000 | -1.84000 | -2.48200 |
| C  | 1.17100  | -0.58400 | -2.96800 |
| C  | 0.95200  | -1.03100 | -4.28200 |
| C  | -0.32500 | -1.59200 | -4.24000 |
| C  | -2.63100 | -3.97300 | -1.03800 |
| C  | -2.36300 | -4.38200 | 0.26900  |
| C  | -1.66200 | -3.30200 | 0.82800  |
| N  | 0.10600  | -0.85400 | -2.20200 |
| N  | -1.53000 | -2.31900 | -0.07400 |
| N  | -0.80500 | -1.46800 | -2.98500 |
| N  | -2.12200 | -2.73800 | -1.21400 |
| Fe | -0.00000 | -0.73700 | -0.00000 |
| H  | 3.04900  | -0.11600 | -0.08600 |
| H  | 1.04300  | 4.39100  | -0.06600 |
| H  | -1.04300 | 4.39100  | 0.06600  |
| H  | -3.04900 | -0.11600 | 0.08600  |

|   |          |         |          |
|---|----------|---------|----------|
| C | 2.64100  | 0.90000 | -0.08600 |
| C | 3.52700  | 2.02300 | -0.13300 |
| C | 2.91900  | 3.32600 | -0.12600 |
| C | 1.51500  | 3.40700 | -0.07000 |
| C | 0.72200  | 2.23600 | -0.02700 |
| C | -0.72200 | 2.23600 | 0.02700  |
| C | -1.51400 | 3.40800 | 0.07000  |
| C | -2.91900 | 3.32600 | 0.12600  |
| C | -3.52700 | 2.02300 | 0.13300  |
| C | -2.64100 | 0.90000 | 0.08600  |
| N | 1.33500  | 1.00700 | -0.03800 |
| N | -1.33500 | 1.00700 | 0.03800  |
| C | -3.78800 | 4.45900 | 0.17700  |
| H | -3.34700 | 5.46100 | 0.17300  |
| C | -4.92600 | 1.88700 | 0.18400  |
| C | -5.74900 | 3.01200 | 0.23300  |
| C | -5.16400 | 4.29600 | 0.23000  |
| H | -5.35700 | 0.88000 | 0.18100  |
| C | 3.78800  | 4.45900 | -0.17700 |
| H | 3.34700  | 5.46100 | -0.17300 |
| C | 4.92600  | 1.88700 | -0.18400 |
| C | 5.75000  | 3.01200 | -0.23300 |
| C | 5.16400  | 4.29600 | -0.23000 |
| H | 5.35700  | 0.88000 | -0.18200 |
| H | 5.80900  | 5.18100 | -0.26800 |
| H | 6.83700  | 2.90300 | -0.27200 |
| H | -5.80900 | 5.18100 | 0.26800  |
| H | -6.83700 | 2.90300 | 0.27200  |

43) Another neutral LS complex for  $N_c = 6$ , Charge = 0,  $S = 0$

|   |          |          |          |
|---|----------|----------|----------|
| H | -2.98600 | -1.24300 | -2.08800 |
| H | -2.85400 | -2.94500 | -3.17600 |
| H | 1.98000  | -0.55900 | -2.41700 |
| H | 1.39800  | -1.15000 | -5.04000 |
| H | -1.15800 | -2.23800 | -4.88400 |
| H | -3.49500 | -4.70300 | -1.49200 |
| H | -2.76000 | -5.59500 | 1.03600  |
| H | -0.95900 | -3.67200 | 1.87300  |
| B | -2.32500 | -2.25400 | -2.31400 |
| C | 1.06900  | -0.98300 | -2.82900 |
| C | 0.77100  | -1.29600 | -4.16300 |
| C | -0.50600 | -1.84900 | -4.10500 |
| C | -2.81500 | -4.27100 | -0.76000 |
| C | -2.43600 | -4.69900 | 0.51000  |
| C | -1.52700 | -3.72400 | 0.94700  |
| N | 0.04300  | -1.31700 | -2.02900 |
| N | -1.38300 | -2.77300 | 0.01100  |
| N | -0.91600 | -1.84700 | -2.82000 |
| N | -2.17100 | -3.11700 | -1.03500 |
| H | 2.98600  | -1.24300 | 2.08800  |
| H | 2.85400  | -2.94500 | 3.17600  |
| H | -1.98000 | -0.55900 | 2.41700  |
| H | -1.39800 | -1.15000 | 5.04000  |
| H | 1.15800  | -2.23800 | 4.88400  |
| H | 3.49500  | -4.70200 | 1.49200  |
| H | 2.76000  | -5.59400 | -1.03600 |
| H | 0.95900  | -3.67200 | -1.87300 |

|    |          |          |          |
|----|----------|----------|----------|
| B  | 2.32500  | -2.25400 | 2.31400  |
| C  | -1.06900 | -0.98300 | 2.82900  |
| C  | -0.77100 | -1.29700 | 4.16300  |
| C  | 0.50600  | -1.84900 | 4.10500  |
| C  | 2.81500  | -4.27100 | 0.76000  |
| C  | 2.43600  | -4.69900 | -0.51000 |
| C  | 1.52700  | -3.72400 | -0.94700 |
| N  | -0.04300 | -1.31700 | 2.02900  |
| N  | 1.38300  | -2.77300 | -0.01100 |
| N  | 0.91600  | -1.84700 | 2.82000  |
| N  | 2.17100  | -3.11700 | 1.03500  |
| Fe | -0.00000 | -1.31000 | -0.00000 |
| H  | -3.00400 | -0.95300 | 0.13700  |
| H  | -1.05100 | 3.57000  | -0.01200 |
| H  | 1.05100  | 3.57000  | 0.01300  |
| H  | 3.00400  | -0.95300 | -0.13700 |
| C  | -2.60800 | 0.06100  | 0.07600  |
| C  | -3.50300 | 1.17000  | 0.08100  |
| C  | -2.93400 | 2.49000  | 0.03700  |
| C  | -1.51300 | 2.58200  | 0.00400  |
| C  | -0.73600 | 1.44700  | 0.00300  |
| C  | 0.73600  | 1.44700  | -0.00300 |
| C  | 1.51300  | 2.58200  | -0.00400 |
| C  | 2.93400  | 2.49100  | -0.03700 |
| C  | 3.50300  | 1.17000  | -0.08100 |
| C  | 2.60800  | 0.06100  | -0.07600 |
| N  | -1.30300 | 0.18100  | 0.02200  |
| N  | 1.30300  | 0.18100  | -0.02200 |
| C  | 3.78700  | 3.60100  | -0.03600 |
| H  | 3.36100  | 4.60800  | -0.00200 |
| C  | 4.89100  | 1.00400  | -0.12000 |
| C  | 5.75000  | 2.11400  | -0.11800 |
| C  | 5.18200  | 3.44500  | -0.07600 |
| H  | 5.31000  | -0.00600 | -0.14400 |
| C  | -3.78700 | 3.60100  | 0.03600  |
| H  | -3.36100 | 4.60800  | 0.00200  |
| C  | -4.89100 | 1.00400  | 0.12000  |
| C  | -5.75000 | 2.11400  | 0.11800  |
| C  | -5.18200 | 3.44500  | 0.07600  |
| H  | -5.31000 | -0.00600 | 0.14400  |
| C  | 6.07100  | 4.56600  | -0.07500 |
| H  | 5.64200  | 5.57300  | -0.04300 |
| C  | 7.17200  | 1.97300  | -0.15400 |
| C  | 7.99000  | 3.07500  | -0.15100 |
| H  | 9.07700  | 2.95400  | -0.17900 |
| C  | 7.43200  | 4.38800  | -0.11100 |
| H  | 8.09800  | 5.25500  | -0.11000 |
| C  | -6.07100 | 4.56600  | 0.07500  |
| H  | -5.64200 | 5.57300  | 0.04300  |
| C  | -7.17300 | 1.97200  | 0.15400  |
| C  | -7.99000 | 3.07500  | 0.15100  |
| H  | -9.07700 | 2.95400  | 0.17900  |
| C  | -7.43200 | 4.38800  | 0.11200  |
| H  | -8.09800 | 5.25500  | 0.11000  |
| H  | -7.59600 | 0.96400  | 0.18300  |
| H  | 7.59600  | 0.96400  | -0.18300 |

44) Another reduced LS complex for  $N_c = 6$ , Charge = -1,  $S = 1/2$



|    |          |          |          |
|----|----------|----------|----------|
| H  | -2.98500 | 1.40400  | 2.17400  |
| H  | -2.71500 | 3.12500  | 3.21600  |
| H  | 1.92400  | 0.40200  | 2.38700  |
| H  | 1.42100  | 1.03000  | 5.02400  |
| H  | -1.05400 | 2.29900  | 4.89800  |
| H  | -3.37300 | 4.83200  | 1.50000  |
| H  | -2.73000 | 5.60700  | -1.09500 |
| H  | -1.01500 | 3.60400  | -1.92800 |
| B  | -2.25900 | 2.37700  | 2.35500  |
| C  | 1.05700  | 0.89500  | 2.81500  |
| C  | 0.79700  | 1.22700  | 4.15400  |
| C  | -0.43700 | 1.87000  | 4.11200  |
| C  | -2.73500 | 4.35800  | 0.75700  |
| C  | -2.40500 | 4.72500  | -0.54500 |
| C  | -1.54000 | 3.70800  | -0.98200 |
| N  | 0.05100  | 1.30700  | 2.02900  |
| N  | -1.37700 | 2.79300  | -0.01400 |
| N  | -0.86000 | 1.90100  | 2.83000  |
| N  | -2.10700 | 3.20000  | 1.04800  |
| H  | 2.98500  | 1.40500  | -2.17400 |
| H  | 2.71500  | 3.12500  | -3.21600 |
| H  | -1.92400 | 0.40200  | -2.38700 |
| H  | -1.42100 | 1.03000  | -5.02400 |
| H  | 1.05400  | 2.29900  | -4.89800 |
| H  | 3.37300  | 4.83300  | -1.50000 |
| H  | 2.73000  | 5.60700  | 1.09500  |
| H  | 1.01500  | 3.60400  | 1.92800  |
| B  | 2.25900  | 2.37700  | -2.35500 |
| C  | -1.05700 | 0.89500  | -2.81500 |
| C  | -0.79700 | 1.22800  | -4.15400 |
| C  | 0.43700  | 1.87000  | -4.11200 |
| C  | 2.73500  | 4.35800  | -0.75700 |
| C  | 2.40500  | 4.72500  | 0.54500  |
| C  | 1.54000  | 3.70800  | 0.98200  |
| N  | -0.05100 | 1.30700  | -2.02900 |
| N  | 1.37700  | 2.79300  | 0.01400  |
| N  | 0.86000  | 1.90200  | -2.83000 |
| N  | 2.10700  | 3.20000  | -1.04800 |
| Fe | 0.00000  | 1.30800  | 0.00000  |
| H  | -3.01100 | 0.93600  | -0.06500 |
| H  | -1.05200 | -3.58400 | -0.01300 |
| H  | 1.05200  | -3.58400 | 0.01300  |
| H  | 3.01100  | 0.93600  | 0.06500  |
| C  | -2.61100 | -0.07800 | -0.03400 |
| C  | -3.51000 | -1.18700 | -0.04600 |
| C  | -2.93300 | -2.51200 | -0.03400 |
| C  | -1.51900 | -2.59800 | -0.01200 |
| C  | -0.72500 | -1.45000 | -0.00000 |
| C  | 0.72500  | -1.45000 | 0.00000  |
| C  | 1.51900  | -2.59800 | 0.01200  |
| C  | 2.93300  | -2.51200 | 0.03300  |
| C  | 3.51000  | -1.18700 | 0.04600  |
| C  | 2.61100  | -0.07800 | 0.03400  |
| N  | -1.30100 | -0.19500 | -0.00200 |
| N  | 1.30100  | -0.19500 | 0.00200  |
| C  | 3.79900  | -3.62000 | 0.05000  |
| H  | 3.37500  | -4.62900 | 0.04100  |
| C  | 4.89600  | -1.02400 | 0.07200  |

|   |          |          |          |
|---|----------|----------|----------|
| C | 5.76900  | -2.13500 | 0.08800  |
| C | 5.20000  | -3.46600 | 0.07700  |
| H | 5.31400  | -0.01200 | 0.07400  |
| C | -3.79900 | -3.62000 | -0.05000 |
| H | -3.37500 | -4.62900 | -0.04100 |
| C | -4.89600 | -1.02400 | -0.07200 |
| C | -5.76900 | -2.13500 | -0.08800 |
| C | -5.20000 | -3.46600 | -0.07700 |
| H | -5.31400 | -0.01200 | -0.07400 |
| C | 6.09300  | -4.57900 | 0.09500  |
| H | 5.66600  | -5.58700 | 0.08700  |
| C | 7.18400  | -1.99300 | 0.11400  |
| C | 8.01800  | -3.09700 | 0.13000  |
| H | 9.10400  | -2.96600 | 0.14900  |
| C | 7.46300  | -4.40100 | 0.12100  |
| H | 8.12600  | -5.27300 | 0.13300  |
| C | -6.09300 | -4.57900 | -0.09500 |
| H | -5.66600 | -5.58700 | -0.08700 |
| C | -7.18400 | -1.99300 | -0.11400 |
| C | -8.01800 | -3.09700 | -0.13000 |
| H | -9.10400 | -2.96600 | -0.14900 |
| C | -7.46300 | -4.40100 | -0.12100 |
| H | -8.12600 | -5.27300 | -0.13300 |
| H | -7.60400 | -0.98200 | -0.11900 |
| H | 7.60400  | -0.98200 | 0.11900  |

45) Another neutral HS complex for  $N_c = 6$ , Charge = 0,  $S = 2$

|   |          |          |          |
|---|----------|----------|----------|
| H | -2.83900 | -1.19400 | -2.13400 |
| H | -2.94800 | -2.82400 | -3.34800 |
| H | 2.10400  | -0.94400 | -2.54200 |
| H | 1.55500  | -1.66600 | -5.15600 |
| H | -1.09200 | -2.50400 | -5.02300 |
| H | -3.48900 | -4.80800 | -1.90000 |
| H | -2.95100 | -5.83600 | 0.62500  |
| H | -1.30700 | -3.90100 | 1.74100  |
| B | -2.32200 | -2.25800 | -2.45900 |
| C | 1.17600  | -1.31900 | -2.97000 |
| C | 0.89400  | -1.69500 | -4.29200 |
| C | -0.43400 | -2.12200 | -4.24500 |
| C | -2.88800 | -4.40300 | -1.08800 |
| C | -2.60900 | -4.90100 | 0.18500  |
| C | -1.78200 | -3.92600 | 0.76100  |
| N | 0.09900  | -1.50100 | -2.19100 |
| N | -1.58800 | -2.91500 | -0.10100 |
| N | -0.88100 | -1.99200 | -2.98000 |
| N | -2.26500 | -3.21700 | -1.23400 |
| H | 2.84000  | -1.19200 | 2.13300  |
| H | 2.94900  | -2.82100 | 3.34900  |
| H | -2.10300 | -0.94200 | 2.54200  |
| H | -1.55400 | -1.66100 | 5.15700  |
| H | 1.09300  | -2.49900 | 5.02400  |
| H | 3.48900  | -4.80600 | 1.90200  |
| H | 2.95100  | -5.83700 | -0.62100 |
| H | 1.30600  | -3.90300 | -1.73900 |
| B | 2.32300  | -2.25600 | 2.46000  |
| C | -1.17500 | -1.31700 | 2.97000  |
| C | -0.89300 | -1.69100 | 4.29300  |

|    |          |          |          |
|----|----------|----------|----------|
| C  | 0.43500  | -2.11800 | 4.24600  |
| C  | 2.88800  | -4.40200 | 1.09100  |
| C  | 2.60900  | -4.90100 | -0.18300 |
| C  | 1.78200  | -3.92600 | -0.75900 |
| N  | -0.09900 | -1.49900 | 2.19200  |
| N  | 1.58800  | -2.91500 | 0.10200  |
| N  | 0.88200  | -1.99000 | 2.98100  |
| N  | 2.26500  | -3.21600 | 1.23500  |
| Fe | -0.00000 | -1.45500 | -0.00000 |
| H  | -3.02900 | -0.79700 | 0.14700  |
| H  | -1.04200 | 3.71400  | -0.02700 |
| H  | 1.04200  | 3.71400  | 0.02600  |
| H  | 3.02900  | -0.79700 | -0.14800 |
| C  | -2.62900 | 0.22000  | 0.10500  |
| C  | -3.51800 | 1.33600  | 0.10700  |
| C  | -2.92900 | 2.64900  | 0.05600  |
| C  | -1.50800 | 2.72700  | 0.01200  |
| C  | -0.74100 | 1.58300  | 0.01700  |
| C  | 0.74100  | 1.58300  | -0.01700 |
| C  | 1.50700  | 2.72800  | -0.01200 |
| C  | 2.92900  | 2.64900  | -0.05700 |
| C  | 3.51700  | 1.33600  | -0.10800 |
| C  | 2.62900  | 0.22000  | -0.10600 |
| N  | -1.32800 | 0.33600  | 0.05800  |
| N  | 1.32800  | 0.33600  | -0.05900 |
| C  | 3.77000  | 3.77000  | -0.05300 |
| H  | 3.33200  | 4.77200  | -0.01500 |
| C  | 4.90700  | 1.18800  | -0.14900 |
| C  | 5.75200  | 2.30800  | -0.14500 |
| C  | 5.16600  | 3.63100  | -0.09800 |
| H  | 5.33800  | 0.18200  | -0.17800 |
| C  | -3.77000 | 3.77000  | 0.05300  |
| H  | -3.33300 | 4.77200  | 0.01400  |
| C  | -4.90700 | 1.18700  | 0.14800  |
| C  | -5.75200 | 2.30700  | 0.14400  |
| C  | -5.16700 | 3.63100  | 0.09700  |
| H  | -5.33800 | 0.18200  | 0.17700  |
| C  | 6.04100  | 4.76400  | -0.09500 |
| H  | 5.60000  | 5.76400  | -0.05900 |
| C  | 7.17600  | 2.18400  | -0.18500 |
| C  | 7.97900  | 3.29700  | -0.18100 |
| H  | 9.06800  | 3.19000  | -0.21200 |
| C  | 7.40400  | 4.60200  | -0.13600 |
| H  | 8.05900  | 5.47800  | -0.13300 |
| C  | -6.04100 | 4.76300  | 0.09400  |
| H  | -5.60000 | 5.76400  | 0.05900  |
| C  | -7.17600 | 2.18400  | 0.18500  |
| C  | -7.98000 | 3.29700  | 0.18000  |
| H  | -9.06800 | 3.19000  | 0.21100  |
| C  | -7.40400 | 4.60200  | 0.13500  |
| H  | -8.05900 | 5.47800  | 0.13200  |
| H  | -7.61200 | 1.18100  | 0.21800  |
| H  | 7.61200  | 1.18100  | -0.21900 |

46) Another reduced HS complex for  $N_c = 6$ , Charge = -1,  $S = 3/2$

|   |          |          |          |
|---|----------|----------|----------|
| H | -2.72600 | -1.39200 | -2.33700 |
| H | -2.63800 | -3.06800 | -3.50000 |

|    |          |          |          |
|----|----------|----------|----------|
| H  | 2.19300  | -0.78700 | -2.43000 |
| H  | 1.87300  | -1.61500 | -5.05600 |
| H  | -0.70800 | -2.65300 | -5.06300 |
| H  | -3.11700 | -5.04500 | -2.03400 |
| H  | -2.71500 | -5.94300 | 0.56700  |
| H  | -1.32800 | -3.84300 | 1.73400  |
| B  | -2.11900 | -2.42600 | -2.59000 |
| C  | 1.33000  | -1.25000 | -2.90700 |
| C  | 1.16300  | -1.67900 | -4.23400 |
| C  | -0.12900 | -2.20600 | -4.25700 |
| C  | -2.62000 | -4.56700 | -1.19100 |
| C  | -2.41200 | -4.99800 | 0.11900  |
| C  | -1.71700 | -3.93700 | 0.72100  |
| N  | 0.22400  | -1.49700 | -2.19400 |
| N  | -1.53300 | -2.94500 | -0.16100 |
| N  | -0.66400 | -2.08100 | -3.02500 |
| N  | -2.08400 | -3.33900 | -1.33000 |
| H  | 2.72700  | -1.39600 | 2.33700  |
| H  | 2.63700  | -3.07300 | 3.49900  |
| H  | -2.19200 | -0.78800 | 2.43100  |
| H  | -1.87300 | -1.61900 | 5.05700  |
| H  | 0.70800  | -2.65800 | 5.06200  |
| H  | 3.11500  | -5.04900 | 2.03100  |
| H  | 2.71200  | -5.94400 | -0.57200 |
| H  | 1.32700  | -3.84200 | -1.73600 |
| B  | 2.11900  | -2.42900 | 2.59000  |
| C  | -1.33000 | -1.25200 | 2.90700  |
| C  | -1.16200 | -1.68200 | 4.23400  |
| C  | 0.12900  | -2.21000 | 4.25700  |
| C  | 2.61900  | -4.57000 | 1.18900  |
| C  | 2.41000  | -5.00000 | -0.12300 |
| C  | 1.71600  | -3.93700 | -0.72400 |
| N  | -0.22400 | -1.49900 | 2.19400  |
| N  | 1.53200  | -2.94600 | 0.15900  |
| N  | 0.66400  | -2.08400 | 3.02500  |
| N  | 2.08300  | -3.34100 | 1.32900  |
| Fe | 0.00000  | -1.37900 | 0.00000  |
| H  | -3.04600 | -0.76000 | -0.04500 |
| H  | -1.03400 | 3.73800  | 0.06000  |
| H  | 1.03400  | 3.73800  | -0.06000 |
| H  | 3.04700  | -0.76000 | 0.04700  |
| C  | -2.63900 | 0.25500  | -0.02000 |
| C  | -3.52700 | 1.37400  | 0.00800  |
| C  | -2.92700 | 2.68800  | 0.04000  |
| C  | -1.50800 | 2.75600  | 0.03300  |
| C  | -0.73200 | 1.59900  | 0.00300  |
| C  | 0.73300  | 1.59900  | -0.00200 |
| C  | 1.50900  | 2.75600  | -0.03300 |
| C  | 2.92700  | 2.68800  | -0.03900 |
| C  | 3.52700  | 1.37400  | -0.00700 |
| C  | 2.63900  | 0.25500  | 0.02200  |
| N  | -1.32900 | 0.36200  | -0.02100 |
| N  | 1.32900  | 0.36200  | 0.02300  |
| C  | 3.77200  | 3.80900  | -0.07600 |
| H  | 3.33100  | 4.81100  | -0.10100 |
| C  | 4.91600  | 1.23400  | -0.00900 |
| C  | 5.77000  | 2.36000  | -0.04600 |
| C  | 5.17800  | 3.68000  | -0.08100 |

|   |          |         |          |
|---|----------|---------|----------|
| H | 5.35200  | 0.23000 | 0.02200  |
| C | -3.77200 | 3.80900 | 0.07600  |
| H | -3.33000 | 4.81100 | 0.10100  |
| C | -4.91600 | 1.23400 | 0.01000  |
| C | -5.76900 | 2.36000 | 0.04700  |
| C | -5.17700 | 3.68000 | 0.08200  |
| H | -5.35200 | 0.23100 | -0.02000 |
| C | 6.04900  | 4.80800 | -0.12000 |
| H | 5.60400  | 5.80800 | -0.14700 |
| C | 7.18700  | 2.24400 | -0.04900 |
| C | 8.00000  | 3.36200 | -0.08700 |
| H | 9.08900  | 3.25100 | -0.08900 |
| C | 7.42300  | 4.65600 | -0.12300 |
| H | 8.07000  | 5.53800 | -0.15300 |
| C | -6.04900 | 4.80800 | 0.12000  |
| H | -5.60300 | 5.80800 | 0.14700  |
| C | -7.18700 | 2.24400 | 0.05000  |
| C | -8.00000 | 3.36200 | 0.08800  |
| H | -9.08900 | 3.25100 | 0.08900  |
| C | -7.42200 | 4.65600 | 0.12300  |
| H | -8.07000 | 5.53800 | 0.15300  |
| H | -7.62600 | 1.24100 | 0.02200  |
| H | 7.62600  | 1.24100 | -0.02000 |
